# Supplementary material for: Interception of benzyne with thioethers: a facile access to sulfur ylides under mild conditions
Source: Royal Society of Chemistry journal article supplement (doi:10.1039/c3ra47206j), 2014-01-01

# SUPPORTING INFORMATION

## for

### Interception Of Benzyne With Thioethers: A Facile Access To Sulfur Ylides In Mild

#### Conditions

Hua-Dong Xu,<sup>\*,†,‡</sup> Mao-Qiang Cai,<sup>†</sup> Wei-Jie He<sup>†</sup> Wen-Hao Hu<sup>†</sup>, and Mei-Hua Shen<sup>\*,‡</sup>

*huadongxu@gmail.com*

<sup>†</sup> Shanghai Engineering Research Centre of Molecular Therapeutics and New Drug Development, East China Normal University, Shanghai, 200062, China; <sup>‡</sup> School of Pharmaceutical Engineering and Life Science, Changzhou University, Changzhou, Jiangsu Province, 213164, China.

|                                                                                        |       |
|----------------------------------------------------------------------------------------|-------|
| General Information.....                                                               | 2     |
| Preparation of starting materials.....                                                 | 2     |
| General procedure.....                                                                 | 2-3   |
| References.....                                                                        | 3     |
| Analytical Data for the Products.....                                                  | 4-18  |
| NMR spectra for the Products.....                                                      | 19-90 |
| 5-fluoro-1-methyl-3'-((E)-styryl)spiro[indoline-3,2'-oxiran]-2-one(NOESY) :4af.....    | 91-92 |
| 1-methyl-5-nitro-3'-((E)-styryl)spiro[indoline-3,2'-oxiran]-2-one(NOESY):4ag.....      | 93-94 |
| 3'-(4-chlorophenyl)-5-fluoro-1-methylspiro[indoline-3,2'-oxiran]-2-one(NOESY):4ff..... | 95-96 |
| 5-fluoro-1-methyl-3'-vinylspiro[indoline-3,2'-oxiran]-2-one(NOESY):4gf.....            | 97-98 |

## General Information

Unless otherwise stated, all commercial reagents were used without additional purification. CH<sub>3</sub>CN was freshly distilled from calcium hydride prior to use. Benzyne precursors *o*-Trialkylsilylaryl triflates and thioethers were prepared according to literature procedures.<sup>1,2</sup> Isatins were methylated with CH<sub>3</sub>I. All reactions were performed under an argon atmosphere in an oven-dried flask. <sup>1</sup>H NMR spectra were recorded on 500 MHz or 400 MHz spectrometer. <sup>13</sup>C NMR spectra were recorded on 125 MHz or 100 MHz spectrometer. Chemical shifts are reported in ppm with the internal standard tetramethylsilane ( $\delta = 0$  ppm) for <sup>1</sup>H NMR and CDCl<sub>3</sub> ( $\delta = 77.00$  ppm) for <sup>13</sup>C NMR. HRMS: (ESI) Mass Spectra were obtained on a IonSpec FT-ICR mass spectrometer.

### Preparation of starting materials:

Benzyne precursors *o*-Trialkylsilylaryl triflates and thioethers were prepared according to literature procedures.<sup>1,2</sup> Isatins were methylated with CH<sub>3</sub>I.

#### Scheme SI 1: Preparation of *o*-Trialkylsilylaryl triflates

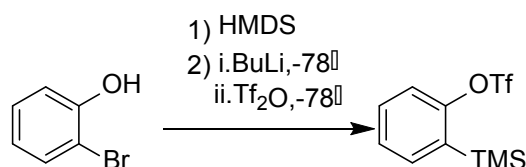

**General procedure for the on pot synthesis of spiro epoxyoxindole:** To a 25 mL flask was introduced *N*-methylisatin (0.25 mmol), thioether (0.38 mmol, 1.5 equiv.), and CsF (0.76 mmol, 3.0 equiv.), The flask was then sealed with a rubber septum, evacuated and backfilled with argon three times. Then anhydrous CH<sub>3</sub>CN (10 mL) was syringed. The mixture was stirred vigorously under 40 °C for 5 min before *o*-Trimethylsilylphenyl triflate (1.2 equiv.) was added in one portion, the reaction mixture was stirred at 40°C overnight. Upon the completion of the reaction (monitored by TLC), the volatiles were removed under reduced pressure. Purification by flash column chromatography on silica gel (15% ethyl acetate in petroleum) gave the spiro epoxyoxindole.

- (1) Peña, D.; Cobas, A.; Pérez, D.; Guitián, E.; *Synthesis*. **2002**, 9, 1454–1458.
- (2) Yu, M.; Xie, Y.; Xie, C.; Zhang, Y. *Org. Lett.* **2012**, 14 (8), 2164–2167.

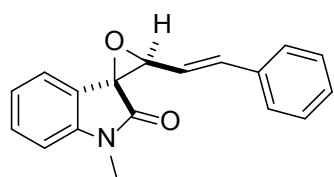

*cis-4aa*

**1-methyl-3'-((E)-styryl)spiro[indoline-3,2'-oxiran]-2-one (*cis-4aa*):**

Yellowish solid. mp:138.4-138.8 °C. <sup>1</sup>H NMR (400 MHz, CDCl<sub>3</sub>) δ ppm 7.49 (dd, *J* = 8.3, 2.0 Hz, 1H), 7.47 – 7.42 (m, 2H), 7.36 – 7.29 (m, 3H), 7.27 (d, *J* = 2.0 Hz, 2H), 6.92 (d, *J* = 16.2 Hz, 1H), 6.80 (dd, *J* = 19.2, 8.4 Hz, 2H), 4.19 (d, *J* = 8.5 Hz, 1H), 3.25 (s, 3H). <sup>13</sup>C NMR (100 MHz, CDCl<sub>3</sub>) δ ppm 170.5, 143.5, 138.5, 135.7, 132.9, 128.7, 127.0, 125.4, 124.9, 121.2, 115.5, 110.1, 67.4, 61.8, 26.7. HRMS calcd for C<sub>18</sub>H<sub>15</sub>NO<sub>2</sub>Na [M+Na]<sup>+</sup> 300.1000, found 300.0990.

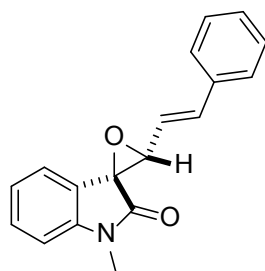

*trans-4aa*

**1-methyl-3'-((E)-styryl)spiro[indoline-3,2'-oxiran]-2-one (*trans-4aa*):**

Yellowish solid. mp:141.2-143.3 °C. <sup>1</sup>H NMR (400 MHz, CDCl<sub>3</sub>) δ ppm 7.50 (dd, *J* = 8.3, 1.9 Hz, 1H), 7.44 – 7.40 (m, 2H), 7.37 (dd, *J* = 7.6, 2.2 Hz, 3H), 7.35 – 7.27 (m, 2H), 7.00 (d, *J* = 16.0 Hz, 1H), 6.79 (d, *J* = 8.3 Hz, 1H), 6.21 (dd, *J* = 16.0, 7.5 Hz, 1H), 4.30 (d, *J* = 7.5 Hz, 1H), 3.26 (s, 3H). <sup>13</sup>C NMR (100 MHz, CDCl<sub>3</sub>) δ ppm 171.3, 144.3, 138.6, 135.4, 132.9, 128.9, 128.8, 127.1, 126.8, 123.5, 120.4, 115.4, 110.3, 65.8, 62.0, 26.8. HRMS: calcd for C<sub>18</sub>H<sub>15</sub>NO<sub>2</sub>Na [M+Na]<sup>+</sup>: 300.0995, found 300.1019.

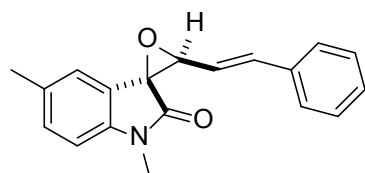

*cis-4ab*

**1,5-dimethyl-3'-((E)-styryl)spiro[indoline-3,2'-oxiran]-2-one (*cis-4ab*):**

Yellowish semisolid. <sup>1</sup>H NMR (400 MHz, CDCl<sub>3</sub>): δ ppm 7.46 (d, *J* = 7.2 Hz, 2H),

7.34-7.26 (m, 3H), 7.17 (d,  $J = 8.0$  Hz, 1H), 6.98 (s, 1H), 6.92-6.82 (m, 2H), 6.79 (d,  $J = 8.0$  Hz, 1H), 4.18 (dd,  $J = 6.8, 1.2$  Hz, 1H), 3.24 (s, 3H), 2.35 (s, 3H).  $^{13}\text{C}$  NMR (100 MHz,  $\text{CDCl}_3$ ):  $\delta$  ppm 171.1, 142.2, 137.9, 135.9, 132.5, 130.4, 128.6, 128.5, 126.9, 123.3, 122.4, 121.9, 108.5, 67.1, 62.3, 26.6, 21.0. HRMS: calcd for  $\text{C}_{19}\text{H}_{17}\text{NO}_2\text{Na}$   $[\text{M}+\text{Na}]^+$ : 314.1151, found 314.1145.

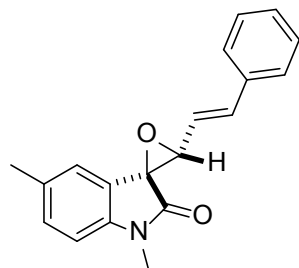

*trans-4ab*

**1,5-dimethyl-3'-((E)-styryl)spiro[indoline-3,2'-oxiran]-2-one (*trans-4ab*):**

Yellowish semisolid.  $^1\text{H}$  NMR (400 MHz,  $\text{CDCl}_3$ ):  $\delta$  ppm 7.42-7.40 (m, 2H), 7.37-7.29 (m, 3H), 7.18 (d,  $J = 7.6$  Hz, 1H), 7.07 (s, 1H), 7.00 (d,  $J = 16$  Hz, 1H), 6.82 (d,  $J = 8.0$  Hz, 1H), 6.31 (dd,  $J = 16.0, 7.6$  Hz, 1H), 4.29 (d,  $J = 7.6$  Hz, 1H), 3.26 (s, 3H), 2.34 (s, 3H).  $^{13}\text{C}$  NMR (100 MHz,  $\text{CDCl}_3$ ):  $\delta$  ppm 171.8, 143.0, 138.0, 135.7, 132.3, 130.4, 128.8, 128.7, 126.7, 124.8, 121.4, 121.3, 108.7, 65.5, 62.4, 26.7, 21.2. HRMS: calcd for  $\text{C}_{19}\text{H}_{17}\text{NO}_2\text{Na}$   $[\text{M}+\text{Na}]^+$ : 314.1151, found 314.1153.

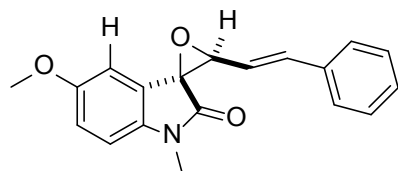

*cis-4ac*

**5-methoxy-1-methyl-3'-((E)-styryl)spiro[indoline-3,2'-oxiran]-2-one (*cis-4ac*):**

Yellowish semisolid.  $^1\text{H}$  NMR (400 MHz,  $\text{CDCl}_3$ )  $\delta$  ppm 7.46 (d,  $J = 7.2$  Hz, 2H), 7.32 (dd,  $J = 14.9, 7.4$  Hz, 4H), 6.89 (d,  $J = 2.7$  Hz, 2H), 6.87 – 6.75 (m, 2H), 4.17 (d,  $J = 7.6$  Hz, 1H), 3.81 (s, 3H), 3.25 (d,  $J = 4.2$  Hz, 3H);  $^{13}\text{C}$  NMR (100 MHz,  $\text{CDCl}_3$ )  $\delta$  ppm 170.9, 156.4, 138.1, 137.9, 135.8, 128.6, 128.5, 127.0, 124.3, 121.7, 114.9, 109.3, 108.6, 67.3, 62.4, 55.9, 26.7. HRMS: calcd for  $\text{C}_{19}\text{H}_{17}\text{NO}_3\text{Na}$   $[\text{M}+\text{Na}]^+$ : 330.1106, found 330.1101.

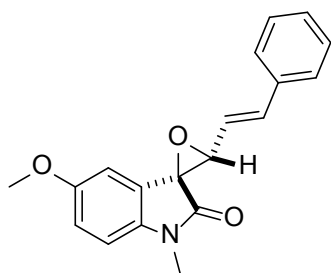

*trans-4ac*

**5-methoxy-1-methyl-3'-((E)-styryl)spiro[indoline-3,2'-oxiran]-2-one (*trans-4ac*):**

Yellowish semisolid.  $^1\text{H}$  NMR (400 MHz,  $\text{CDCl}_3$ )  $\delta$  ppm 7.41 (d,  $J = 7.7$  Hz, 2H), 7.37 – 7.28 (m, 3H), 6.99 (d,  $J = 15.9$  Hz, 1H), 6.89 (d,  $J = 11.1$  Hz, 2H), 6.82 (d,  $J = 8.3$  Hz, 1H), 6.40 – 6.10 (m, 1H), 4.30 (d,  $J = 7.3$  Hz, 1H), 3.76 (s, 3H), 3.33 – 3.18 (m, 3H).  $^{13}\text{C}$  NMR (100 MHz,  $\text{CDCl}_3$ )  $\delta$  ppm 171.5, 155.9, 138.7, 137.9, 135.6, 128.8, 128.7, 126.7, 122.6, 120.9, 114.4, 111.6, 109.3, 65.4, 62.5, 55.9, 26.8. HRMS: calcd for  $\text{C}_{19}\text{H}_{17}\text{NO}_3\text{Na}$   $[\text{M}+\text{Na}]^+$  : 330.1106, found 330.1107.

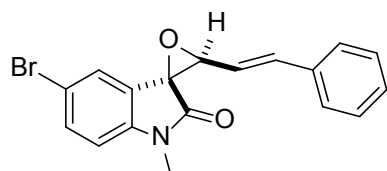

*cis-4ad*

**5-bromo-1-methyl-3'-((E)-styryl)spiro[indoline-3,2'-oxiran]-2-one (*cis-4ad*):**

Yellowish semisolid.  $^1\text{H}$  NMR (400 MHz,  $\text{CDCl}_3$ )  $\delta$  ppm 7.72 (s, 1H), 7.58 – 7.41 (m, 4H), 7.33 (s, 2H), 6.92 (d,  $J = 16.1$  Hz, 1H), 6.80 (dd,  $J = 17.0, 8.1$  Hz, 2H), 4.37 (d,  $J = 5.8$  Hz, 1H), 3.25 (s, 3H).  $^{13}\text{C}$  NMR (100 MHz,  $\text{CDCl}_3$ )  $\delta$  ppm 170.4, 150.1, 143.5, 138.5, 135.7, 135.6, 132.9, 132.1, 128.7, 127.0, 121.2, 116.2, 115.5, 110.1, 67.4, 62.7, 61.6, 26.7. HRMS: calcd for  $\text{C}_{18}\text{H}_{14}\text{BrNO}_2\text{Na}$   $[\text{M}+\text{Na}]^+$  : 378.0100; found 378.0103.

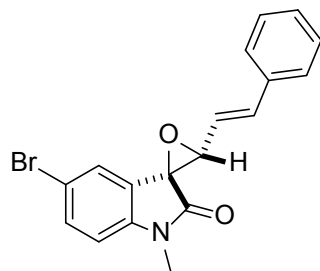

*trans-4ad*

**5-bromo-1-methyl-3'-((E)-styryl)spiro[indoline-3,2'-oxiran]-2-one (*trans-4ad*):**

Yellowish semisolid.  $^1\text{H}$  NMR (400 MHz,  $\text{CDCl}_3$ )  $\delta$  ppm 7.51 (d,  $J = 8.0$  Hz, 1H),

7.42 (d,  $J = 6.5$  Hz, 2H), 7.36 (s, 4H), 7.00 (d,  $J = 15.9$  Hz, 1H), 6.80 (d,  $J = 8.2$  Hz, 1H), 6.21 (dd,  $J = 15.9, 7.1$  Hz, 1H), 4.30 (d,  $J = 6.8$  Hz, 1H), 3.27 (s, 3H).  $^{13}\text{C}$  NMR (100 MHz,  $\text{CDCl}_3$ )  $\delta$  ppm 171.3, 144.3, 138.6, 135.4, 132.9, 128.9, 128.8, 127.1, 126.8, 123.5, 120.4, 115.4, 110.3, 65.8, 61.9, 53.2, 26.8. HRMS: calcd for  $\text{C}_{18}\text{H}_{14}\text{BrNO}_2\text{Na}$   $[\text{M}+\text{Na}]^+$  : 378.0106, found 378.0119.

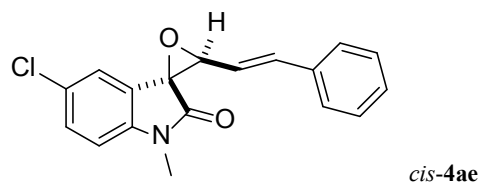

**5-chloro-1-methyl-3'-((E)-styryl)spiro[indoline-3,2'-oxiran]-2-one (*cis-4ae*):**

Yellowish solid. mp:118.4-119.2 °C.  $^1\text{H}$  NMR (400 MHz,  $\text{CDCl}_3$ ):  $\delta$  ppm 7.38 (d,  $J = 7.2$  Hz, 2H), 7.27-7.18 (m, 4H), 7.05 (s, 1H), 6.86 (d,  $J = 16.0$  Hz, 1H), 6.76 (dd,  $J = 14.8, 7.2$  Hz, 2H), 4.12 (d, 8.4 Hz, 1H), 3.17 (s, 3H).  $^{13}\text{C}$  NMR (100 MHz,  $\text{CDCl}_3$ ):  $\delta$  ppm 170.6, 143.0, 138.5, 135.7, 130.0, 128.7, 128.4, 127.0, 125.1, 122.2, 121.2, 109.7, 67.4, 61.9, 26.8. HRMS: calcd for  $\text{C}_{18}\text{H}_{14}\text{ClNO}_2\text{Na}$   $[\text{M}+\text{Na}]^+$  : 334.0605, found 334.0608.

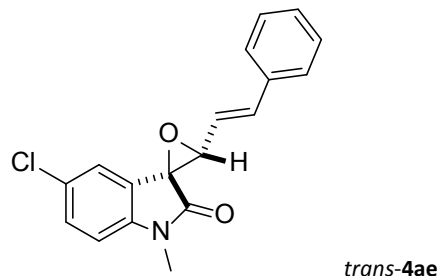

**5-chloro-1-methyl-3'-((E)-styryl)spiro[indoline-3,2'-oxiran]-2-one (*trans-4ae*):**

Yellowish solid. mp:123.1-123.8 °C.  $^1\text{H}$  NMR (400 MHz,  $\text{CDCl}_3$ ):  $\delta$  ppm 7.42-7.40 (m, 2H), 7.37-7.30 (m, 3H), 7.17 (d,  $J = 7.6$  Hz, 1H), 7.07 (dd,  $J = 1.6, 8.0$  Hz, 1H), 7.01 (d,  $J = 15.6$  Hz, 1H), 6.93 (d,  $J = 1.6$  Hz, 1H), 6.26 (dd,  $J = 15.6, 7.2$  Hz, 1H), 4.31 (dd,  $J = 7.2, 0.4$  Hz, 1H), 3.27 (s, 3H).  $^{13}\text{C}$  NMR (100 MHz,  $\text{CDCl}_3$ ):  $\delta$  ppm 171.4, 143.8, 138.6, 135.4, 130.0, 128.9, 128.8, 128.2, 126.8, 124.3, 120.4, 109.8, 65.8, 62.1, 26.8. HRMS: calcd for  $\text{C}_{18}\text{H}_{14}\text{ClNO}_2\text{Na}$   $[\text{M}+\text{Na}]^+$  : 334.0605, found 334.0622.

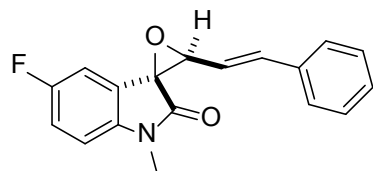

*cis-4af*

**5-fluoro-1-methyl-3'-((E)-styryl)spiro[indoline-3,2'-oxiran]-2-one (*cis-4af*):**

Yellowish semisolid.  $^1\text{H}$  NMR (400 MHz,  $\text{CDCl}_3$ )  $\delta$  ppm 7.37 (d,  $J = 7.3$  Hz, 2H), 7.25 – 7.16 (m, 3H), 6.99 (t,  $J = 8.8$  Hz, 1H), 6.89 – 6.79 (m, 2H), 6.75 (dd,  $J = 15.2$ , 8.8 Hz, 2H), 4.09 (d,  $J = 8.2$  Hz, 1H), 3.17 (s, 3H).  $^{13}\text{C}$  NMR (100 MHz,  $\text{CDCl}_3$ )  $\delta$  ppm 170.7, 160.5, 158.1, 140.4, 138.4, 135.7, 128.6, 126.9, 125.0 (d,  $J = 8.4$  Hz), 121.2, 116.4 (d,  $J = 23.6$  Hz), 109.6 (dd,  $J = 49.7$ , 16.8 Hz), 67.3, 62.1, 26.7. HRMS: calcd for  $\text{C}_{18}\text{H}_{14}\text{NO}_2\text{Na}$   $[\text{M}+\text{Na}]^+$  : 318.0901, found 318.0902.

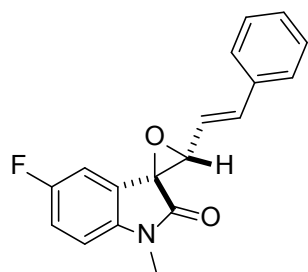

*trans-4af*

**5-fluoro-1-methyl-3'-((E)-styryl)spiro[indoline-3,2'-oxiran]-2-one (*trans-4af*):**

Yellowish semisolid.  $^1\text{H}$  NMR (400 MHz,  $\text{CDCl}_3$ )  $\delta$  ppm 7.42 (d,  $J = 7.6$  Hz, 2H), 7.39 – 7.27 (m, 3H), 7.08 (t,  $J = 8.8$  Hz, 1H), 7.04 – 6.95 (m, 2H), 6.84 (dd,  $J = 8.4$ , 3.9 Hz, 1H), 6.22 (dd,  $J = 15.9$ , 7.3 Hz, 1H), 4.31 (d,  $J = 7.3$  Hz, 1H), 3.27 (s, 3H).  $^{13}\text{C}$  NMR (100 MHz,  $\text{CDCl}_3$ )  $\delta$  ppm 171.7, 160.3, 157.9, 141.4, 138.5, 135.5, 129.0, 129.0, 126.9, 123.2 (d,  $J = 8.5$  Hz), 120.6, 116.6 (d,  $J = 23.7$  Hz), 112.4, 112.2, 109.6 (d,  $J = 8.1$  Hz), 65.8, 62.4, 26.8. HRMS: calcd for  $\text{C}_{18}\text{H}_{14}\text{NO}_2\text{Na}$   $[\text{M}+\text{Na}]^+$  : 318.0901, found 318.0908.

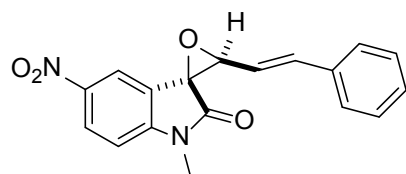

*cis-4ag*

**1-methyl-5-nitro-3'-((E)-styryl)spiro[indoline-3,2'-oxiran]-2-one (*cis-4ag*):**

Yellowish solid. mp: 147.3–148.0 °C.  $^1\text{H}$  NMR (400 MHz,  $\text{CDCl}_3$ )  $\delta$  ppm 8.33 (d,  $J = 8.6$  Hz, 1H), 8.04 (s, 1H), 7.45 (d,  $J = 7.2$  Hz, 2H), 7.37 – 7.28 (m, 3H), 7.02 – 6.92



(m, 2H), 6.76 (dd,  $J = 16.1, 8.7$  Hz, 1H), 4.32 (d,  $J = 8.6$  Hz, 1H), 3.33 (s, 3H).  $^{13}\text{C}$  NMR (100 MHz,  $\text{CDCl}_3$ )  $\delta$  ppm 171.2, 149.7, 143.6, 139.2, 135.5, 128.9, 128.7, 127.0, 124.4, 120.4, 117.6, 108.4, 67.7, 61.5, 29.7, 27.1. HRMS: calcd for  $\text{C}_{18}\text{H}_{14}\text{N}_2\text{O}_4\text{Na}$   $[\text{M}+\text{Na}]^+$ : 345.0846, found 345.0843.

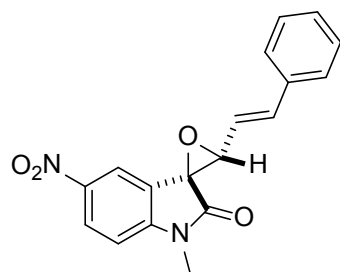

*trans-4ag*

**1-methyl-5-nitro-3'-((E)-styryl)spiro[indoline-3,2'-oxiran]-2-one (*trans-4ag*):**

Yellowish semisolid.  $^1\text{H}$  NMR (400 MHz, DMSO):  $\delta$  ppm 8.38 (d,  $J = 8.8$  Hz, 1H), 8.24 (s, 1H), 7.58 (d,  $J = 7.6$  Hz, 2H), 7.40-7.32 (m, 4H), 7.17 (d,  $J = 16$  Hz, 1H), 6.62 (dd,  $J = 15.6, 6.8$  Hz, 1H), 4.37 (d,  $J = 7.2$  Hz, 1H), 3.28 (s, 3H).  $^{13}\text{C}$  NMR (100 MHz, DMSO):  $\delta$  ppm 171.3, 151.2, 142.7, 138.0, 135.3, 128.7, 128.6, 127.1, 126.9, 121.9, 121.0, 119.0, 109.7, 65.7, 61.4, 27.0. HRMS: calcd for  $\text{C}_{18}\text{H}_{14}\text{N}_2\text{O}_4\text{Na}$   $[\text{M}+\text{Na}]^+$ : 345.0846, found 345.0845.

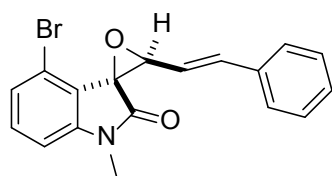

*cis-4ah*

**4-bromo-1-methyl-3'-((E)-styryl)spiro[indoline-3,2'-oxiran]-2-one (*cis-4ah*):**

Yellowish semisolid.  $^1\text{H}$  NMR (400 MHz,  $\text{CDCl}_3$ ):  $\delta$  ppm 7.47-7.45 (m, 2H), 7.34-7.27 (m, 3H), 7.22-7.17 (m, 2H), 6.98-6.86 (m, 2H), 6.84 (dd,  $J = 6.4, 2.4$  Hz, 1H), 5.00 (d,  $J = 8.0$  Hz, 1H), 3.24 (s, 3H).  $^{13}\text{C}$  NMR (100 MHz,  $\text{CDCl}_3$ ):  $\delta$  ppm 169.5, 145.4, 137.5, 134.9, 130.1, 127.6, 127.5, 126.3, 125.9, 120.1, 119.7, 116.6, 106.7, 62.2, 61.0, 25.7. HRMS: calcd for  $\text{C}_{18}\text{H}_{14}\text{BrNO}_2\text{Na}$   $[\text{M}+\text{Na}]^+$ : 378.0100, found 378.0100.

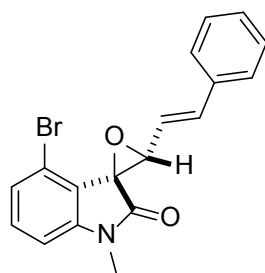

*trans-4ah*

**4-bromo-1-methyl-3'-((E)-styryl)spiro[indoline-3,2'-oxiran]-2-one (*trans-4ah*):**

Yellowish semisolid.  $^1\text{H}$  NMR (400 MHz,  $\text{CDCl}_3$ ):  $\delta$  ppm 7.41-7.39 (m, 2H), 7.35-7.28 (m, 3H), 7.25-7.20 (m, 2H), 7.08 (dd,  $J = 16, 8.8$  Hz, 1H), 6.92-6.86 (m, 2H), 4.22 (d,  $J = 9.2$  Hz, 1H), 3.26 (s, 3H).  $^{13}\text{C}$  NMR (100 MHz,  $\text{CDCl}_3$ ):  $\delta$  ppm 171.8, 146.9, 139.0, 135.6, 131.1, 128.7, 128.2, 126.7, 122.8, 120.4, 117.9, 108.0, 69.2, 64.6, 26.8. HRMS: calcd for  $\text{C}_{18}\text{H}_{14}\text{BrNO}_2\text{Na}$   $[\text{M}+\text{Na}]^+$  : 378.0100, found 378.0097.

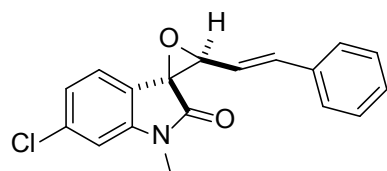

*cis-4ai*

**6-chloro-1-methyl-3'-((E)-styryl)spiro[indoline-3,2'-oxiran]-2-one (*cis-4ai*):**

Yellowish solid. mp:140.7-141.2 °C.  $^1\text{H}$  NMR (400 MHz,  $\text{CDCl}_3$ ):  $\delta$  ppm 7.39 (d,  $J = 7.2$  Hz, 2H), 7.27-7.20 (m, 3H), 7.00 (s, 2H), 6.86-6.82 (m, 2H), 6.77 (dd,  $J = 16.4, 8.4$  Hz, 1H), 4.12 (d,  $J = 8.4$  Hz, 1H), 3.17 (s, 3H).  $^{13}\text{C}$  NMR (100 MHz,  $\text{CDCl}_3$ ):  $\delta$  ppm 171.2, 145.7, 138.3, 136.0, 135.5, 128.6, 126.9, 122.6, 122.5, 121.6, 121.2, 109.5, 67.2, 62.0, 26.7. HRMS: calcd for  $\text{C}_{18}\text{H}_{14}\text{ClNO}_2\text{Na}$   $[\text{M}+\text{Na}]^+$  : 334.0605, found 334.0602.

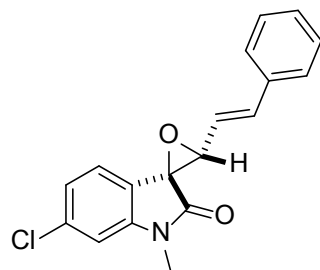

*trans-4ai*

**6-chloro-1-methyl-3'-((E)-styryl)spiro[indoline-3,2'-oxiran]-2-one (*trans-4ai*):**

Yellowish solid. mp:138.8-139.6 °C.  $^1\text{H}$  NMR (400 MHz,  $\text{CDCl}_3$ ):  $\delta$  ppm 7.42 (d,  $J = 7.2$  Hz, 2H), 7.37-7.31 (m, 3H), 7.17 (d,  $J = 8.0$  Hz, 1H), 7.07 (dd,  $J = 8.0, 1.6$  Hz, 1H),

7.01 (d,  $J = 15.6$  Hz, 1H), 6.93 (d,  $J = 1.6$  Hz, 1H), 6.26 (dd,  $J = 16.0, 7.2$  Hz, 1H), 4.31 (d,  $J = 7.2$  Hz, 1H), 3.27 (s, 3H).  $^{13}\text{C}$  NMR (100 MHz,  $\text{CDCl}_3$ ):  $\delta$  ppm 172.0, 146.6, 138.2, 136.4, 135.6, 129.0, 128.9, 126.9, 124.9, 122.7, 120.8, 109.9, 65.6, 62.2, 26.9. HRMS: calcd for  $\text{C}_{18}\text{H}_{14}\text{ClNO}_2\text{Na}$   $[\text{M}+\text{Na}]^+$  : 334.0605, found 334.0615.

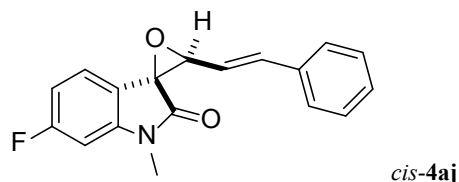

**6-fluoro-1-methyl-3'-((E)-styryl)spiro[indoline-3,2'-oxiran]-2-one (*cis-4aj*):**

Yellowish semisolid.  $^1\text{H}$  NMR (400 MHz,  $\text{CDCl}_3$ ):  $\delta$  ppm 7.39 (d,  $J = 6.4$  Hz, 2H), 7.28-7.19 (m, 3H), 7.03 (d,  $J = 4.0$  Hz, 1H), 6.86 (d,  $J = 16.4$  Hz, 1H), 6.72-6.68 (m, 2H), 6.59 (d,  $J = 8.8$  Hz, 1H), 4.12 (d,  $J = 8.0$  Hz, 1H), 3.18 (s, 3H);  $^{13}\text{C}$  NMR (100 MHz,  $\text{CDCl}_3$ ):  $\delta$  ppm  $^{13}\text{C}$  NMR (100 MHz,  $\text{CDCl}_3$ )  $\delta$  171.4, 165.6, 163.2, 146.1, 138.3, 135.8, 130.9, 128.7, 126.9, 123.0 (d,  $J = 10.1$  Hz), 121.4, 109.0 (d,  $J = 22.7$  Hz), 97.8 (d,  $J = 27.8$  Hz), 67.1, 61.9, 26.8. HRMS: calcd for  $\text{C}_{18}\text{H}_{14}\text{FNO}_2\text{Na}$   $[\text{M}+\text{Na}]^+$  : 318.0901; found 318.0917.

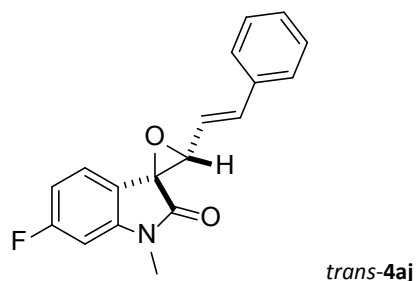

**6-fluoro-1-methyl-3'-((E)-styryl)spiro[indoline-3,2'-oxiran]-2-one (*trans-4aj*):**

Yellowish semisolid.  $^1\text{H}$  NMR (400 MHz,  $\text{CDCl}_3$ ):  $\delta$  ppm 7.35 (d,  $J = 6.4$  Hz, 2H), 7.30-7.24 (m, 3H), 7.14 (dd,  $J = 7.2, 4.0$  Hz, 1H), 6.94 (d,  $J = 16.0$  Hz, 1H), 6.70 (t,  $J = 8.4$  Hz, 1H), 6.61 (d,  $J = 8.4$  Hz, 1H), 6.20 (dd,  $J = 16.0, 6.8$  Hz), 4.23 (d,  $J = 6.8$  Hz, 1H), 3.19 (s, 3H);  $^{13}\text{C}$  NMR (100 MHz,  $\text{CDCl}_3$ ):  $\delta$  ppm 172.2, 165.6, 163.2, 147.0, 138.0, 135.5, 128.8, 126.8, 125.3 (d,  $J = 10.0$  Hz), 120.8, 116.7, 109.0 (d,  $J = 22.7$  Hz), 98.0 (d,  $J = 27.8$  Hz), 65.3, 62.0, 26.8. HRMS: calcd for  $\text{C}_{18}\text{H}_{14}\text{FNO}_2\text{Na}$   $[\text{M}+\text{Na}]^+$  : 318.0901, found 318.0921.

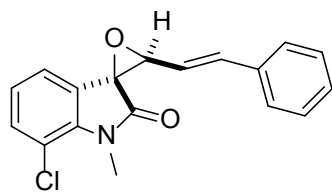

*cis-4ak*

**7-chloro-1-methyl-3'-((E)-styryl)spiro[indoline-3,2'-oxiran]-2-one (*cis-4ak*):**

Yellowish solid. mp:146.0-148.0 °C. <sup>1</sup>H NMR (400 MHz, CDCl<sub>3</sub>): δ ppm 7.46-7.44 (d, *J* = 8.0 Hz, 2H), 7.35-7.30 (m, 3H), 7.28 (d, *J* = 8.4 Hz, 1H), 7.04-6.98 (m, 2H), 6.93 (d, *J* = 16 Hz, 1H), 6.83 (dd, *J* = 16.4, 8.4 Hz, 1H), 4.16 (d, *J* = 8.4 Hz, 1H), 3.63 (s, 3H). <sup>13</sup>C NMR (100 MHz, CDCl<sub>3</sub>): δ ppm 171.3, 140.2, 138.5, 135.7, 132.4, 128.7, 127.0, 126.2, 123.6, 121.2, 120.0, 116.3, 67.8, 61.7, 29.9. HRMS: calcd for C<sub>18</sub>H<sub>14</sub>ClNO<sub>2</sub>Na [M+Na]<sup>+</sup> : 334.0605, found 334.0607.

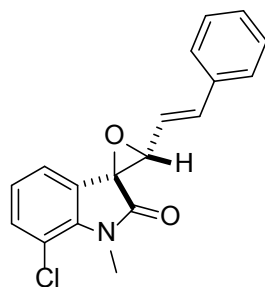

*trans-4ak*

**7-chloro-1-methyl-3'-((E)-styryl)spiro[indoline-3,2'-oxiran]-2-one (*trans-4ak*):**

Yellowish semisolid. <sup>1</sup>H NMR (400 MHz, CDCl<sub>3</sub>): δ ppm 7.40 (d, *J* = 6.8 Hz, 2H), 7.36-7.28 (m, 4H), 7.14 (d, *J* = 7.2 Hz, 1H), 7.00-6.96 (m, 2H), 6.26 (dd, *J* = 16.0, 7.6 Hz, 1H), 4.31 (d, *J* = 7.2 Hz, 1H), 3.64 (s, 3H). <sup>13</sup>C NMR (100 MHz, CDCl<sub>3</sub>): δ ppm 172.2, 141.0, 138.4, 135.5, 132.4, 128.8, 126.8, 124.3, 123.4, 122.4, 120.4, 116.5, 66.2, 61.8, 30.2. HRMS: calcd for C<sub>18</sub>H<sub>14</sub>ClNO<sub>2</sub>Na [M+Na]<sup>+</sup> : 334.0605, found 334.0615.

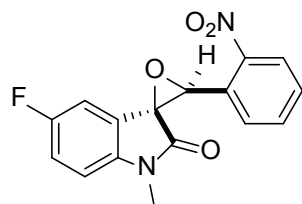

*cis-4bf*

**5-fluoro-1-methyl-3'-(2-nitrophenyl)spiro[indoline-3,2'-oxiran]-2-one (*cis-4bf*):**

Yellowish semisolid. <sup>1</sup>H NMR (400 MHz, CDCl<sub>3</sub>) δ 8.23 (d, *J* = 4.6 Hz, 1H), 8.00 (s, 1H), 7.79 (t, *J* = 7.6 Hz, 1H), 7.56 (t, *J* = 7.8 Hz, 1H), 7.12 (dd, *J* = 12.2, 5.4 Hz, 1H),

7.07 – 7.01 (m, 1H), 6.83 (dd,  $J = 8.4, 3.8$  Hz, 1H), 5.06 (s, 1H), 3.11 (s, 3H).  $^{13}\text{C}$  NMR (100 MHz,  $\text{CDCl}_3$ ): ppm 169.4, 160.6, 158.3, 146.5, 140.8, 133.8, 130.4, 129.7, 124.5, 121.9, 117.0, 116.8, 110.5, 110.2, 109.6, 109.5, 62.3, 65.1, 26.7. HRMS: calcd for  $\text{C}_{16}\text{H}_{11}\text{FN}_2\text{O}_4\text{Na}$   $[\text{M}+\text{Na}]^+$  : 337.0601 ,found 337.0617.

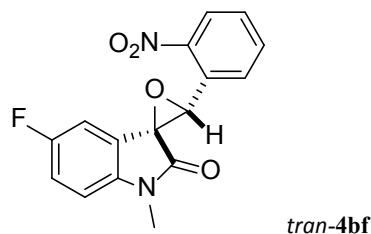

**5-fluoro-1-methyl-3'-(2-nitrophenyl)spiro[indoline-3,2'-oxiran]-2-one (*trans-4bf*):**

Yellowish semisolid.  $^1\text{H}$  NMR (400 MHz,  $\text{CDCl}_3$ )  $\delta$  8.20 (d,  $J = 10.7$  Hz, 1H), 8.07 – 8.01 (m, 1H), 7.87 (t,  $J = 7.5$  Hz, 1H), 7.65 (t,  $J = 7.8$  Hz, 1H), 7.00 – 6.91 (m, 1H), 5.82 – 5.71 (m, 1H), 5.16 (s, 1H), 3.31 (s, 3H).  $^{13}\text{C}$  NMR (100 MHz,  $\text{CDCl}_3$ ):  $\delta$  ppm 170.7, 159.7, 157.3, 146.8, 141.5, 134.5, 130.4, 129.5, 125.1, 122.0, 116.9, 116.7, 110.7, 110.4, 109.6, 109.5, 64.4, 61.7, 26.9. HRMS: calcd for  $\text{C}_{16}\text{H}_{11}\text{FN}_2\text{O}_4\text{Na}$   $[\text{M}+\text{Na}]^+$  : 337.0601 ,found 337.0617.

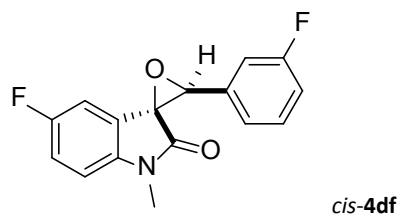

**5-fluoro-3'-(3-fluorophenyl)-1-methylspiro[indoline-3,2'-oxiran]-2-one (*cis-4df*):**

Yellowish solid. mp:158.0-158.6 °C.  $^1\text{H}$  NMR (400 MHz,  $\text{CDCl}_3$ ):  $\delta$  ppm 7.34 (s, 3H), 7.12-7.03 (m, 2H), 6.97-6.95 (m, 1H), 6.83 (dd,  $J = 8.4, 3.6$  Hz, 1H), 4.60 (s, 1H), 3.14 (s, 3H).  $^{13}\text{C}$  NMR (100 MHz,  $\text{CDCl}_3$ ):  $\delta$  ppm 169.3, 163.6, 160.8(d,  $J = 62.4$  Hz), 158.1, 140.5, 133.9 (d,  $J = 7.7$  Hz), 129.3 (d,  $J = 8.1$  Hz), 124.9 (d,  $J = 8.4$  Hz), 123.1 (d,  $J = 2.9$  Hz), 116.3 (dd,  $J = 70.8, 22.4$  Hz), 114.7(d,  $J = 23.1$  Hz), 109.6 (dd,  $J = 53.4, 16.7$  Hz), 66.8, 61.8, 26.6. HRMS: calcd for  $\text{C}_{16}\text{H}_{11}\text{NO}_2\text{F}_2\text{Na}$   $[\text{M}+\text{Na}]^+$  : 310.0656 ,found 310.0654 .

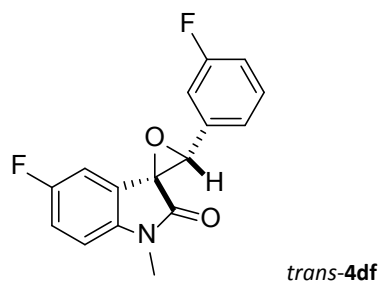

**5-fluoro-3'-(3-fluorophenyl)-1-methylspiro[indoline-3,2'-oxiran]-2-one (*trans-4df*):**

Yellowish semisolid.  $^1\text{H}$  NMR (400 MHz,  $\text{CDCl}_3$ ):  $\delta$  ppm 7.43 (dd,  $J = 13.6, 7.6$  Hz, 1H), 7.24 (d,  $J = 7.6$  Hz, 1H), 7.16 (d,  $J = 9.2$  Hz, 1H), 7.12 (t,  $J = 8.4$  Hz, 1H), 7.02-6.97 (m, 1H), 6.82 (dd,  $J = 8.4, 3.6$  Hz, 1H), 6.23 (dd,  $J = 8.0, 2.0$  Hz, 1H), 4.80 (s, 1H), 3.29 (s, 3H).  $^{13}\text{C}$  NMR (100 MHz,  $\text{CDCl}_3$ ):  $\delta$  ppm 171.0, 164.1, 161.6, 159.9, 157.5, 141.3, 135.4, 135.3, 130.5 (d,  $J = 8.4$  Hz), 122.3 (t,  $J = 5.3$  Hz), 116.4 (dd,  $J = 58.0, 22.4$  Hz), 113.8 (d,  $J = 23.1$  Hz), 111.8 (d,  $J = 26.4$  Hz), 109.3 (d,  $J = 8.1$  Hz), 64.5 (d,  $J = 2.6$  Hz), 61.5, 26.8. HRMS: calcd for  $\text{C}_{16}\text{H}_{11}\text{NO}_2\text{F}_2\text{Na}$   $[\text{M}+\text{Na}]^+$  : 310.0656, found 310.0659.

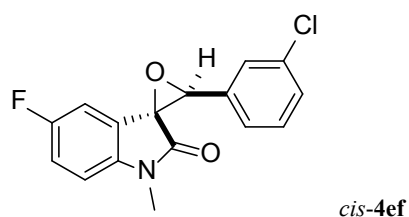

**3'-(3-chlorophenyl)-5-fluoro-1-methylspiro[indoline-3,2'-oxiran]-2-one (*cis-4ef*):**

Yellowish solid. mp: 179.8-180.5 °C.  $^1\text{H}$  NMR (400 MHz,  $\text{CDCl}_3$ ):  $\delta$  ppm 7.57 (s, 1H), 7.49 (d,  $J = 3.2$  Hz, 1H), 7.32 (d,  $J = 4.4$  Hz, 2H), 7.12 (td,  $J = 8.8, 2.0$  Hz, 1H), 6.97 (dd,  $J = 7.2, 2.4$  Hz, 1H), 6.83 (dd,  $J = 8.4, 3.6$  Hz, 1H), 4.58 (s, 1H), 3.14 (s, 3H).  $^{13}\text{C}$  NMR (100 MHz,  $\text{CDCl}_3$ ):  $\delta$  ppm 169.3, 160.5, 158.1, 140.5, 133.8, 133.4, 129.1 (d,  $J = 6.6$  Hz), 127.6, 125.6, 124.8 (d,  $J = 8.1$  Hz), 116.7 (d,  $J = 23.8$  Hz), 109.9 (d,  $J = 25.7$  Hz), 109.4 (d,  $J = 8.1$  Hz), 66.7, 61.8, 26.7. HRMS: calcd for  $\text{C}_{16}\text{H}_{11}\text{NO}_2\text{FCINa}$   $[\text{M}+\text{Na}]^+$  : 326.0360, found 326.0352.

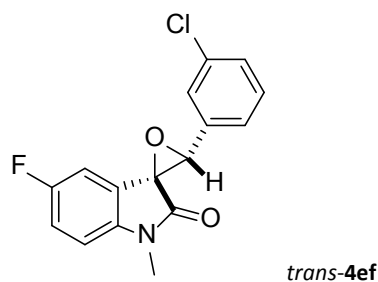

**3'-(3-chlorophenyl)-5-fluoro-1-methylspiro[indoline-3,2'-oxiran]-2-one(*trans-4ef*):**

Yellowish semisolid.  $^1\text{H}$  NMR (400 MHz,  $\text{CDCl}_3$ ):  $\delta$  ppm 7.44 (s, 1H), 7.38-7.32 (m, 3H), 7.03 (td,  $J = 8.8, 2.4$  Hz, 1H), 6.82 (dd,  $J = 8.4, 4.0$  Hz, 1H), 6.23 (dd,  $J = 8.0, 2.8$  Hz, 1H), 4.78 (s, 1H), 3.29 (s, 3H).  $^{13}\text{C}$  NMR (100 MHz,  $\text{CDCl}_3$ ):  $\delta$  ppm 171.0, 159.9, 157.5, 141.3, 134.8, 130.0, 129.3, 126.8, 124.7, 122.2 (d,  $J = 8.8$  Hz), 116.7 (d,  $J = 23.5$  Hz), 111.8 (d,  $J = 26.4$  Hz), 109.3 (d,  $J = 8.1$  Hz), 64.4, 61.5, 26.8. HRMS: calcd for  $\text{C}_{16}\text{H}_{11}\text{NO}_2\text{FCINa}$   $[\text{M}+\text{Na}]^+$  : 326.0360 , found 326.0351 .

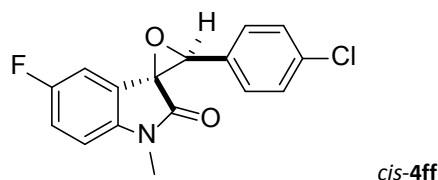

**3'-(4-chlorophenyl)-5-fluoro-1-methylspiro[indoline-3,2'-oxiran]-2-one (*cis-4ff*):**

Yellowish semisolid.  $^1\text{H}$  NMR (400 MHz,  $\text{CDCl}_3$ ):  $\delta$  ppm 7.54 (d,  $J = 8.0$  Hz, 2H), 7.36 (d,  $J = 8.0$  Hz, 2H), 7.11 (t,  $J = 8.0$  Hz, 1H), 6.97 (d,  $J = 6.0$  Hz, 1H), 6.83 (dd,  $J = 8.0, 3.2$  Hz, 1H), 4.58 (s, 1H), 3.14 (s, 3H).  $^{13}\text{C}$  NMR (100 MHz,  $\text{CDCl}_3$ ):  $\delta$  ppm 169.4, 160.5, 158.1, 140.5 (d,  $J = 1.8$  Hz), 134.9, 129.8, 128.9, 128.0, 124.93 (d,  $J = 8.1$  Hz), 116.58 (d,  $J = 23.5$  Hz), 110.0, 109.37 (d,  $J = 7.7$  Hz), 67.0, 61.8, 26.6. HRMS: calcd for  $\text{C}_{16}\text{H}_{11}\text{NO}_2\text{FCINa}$   $[\text{M}+\text{Na}]^+$  : 326.0360, found 326.0368 .

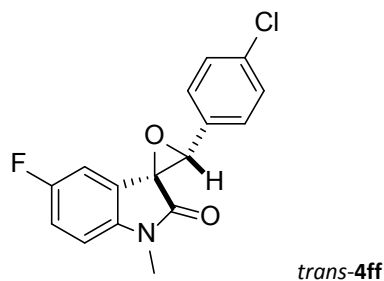

**3'-(4-chlorophenyl)-5-fluoro-1-methylspiro[indoline-3,2'-oxiran]-2-one(*trans-4ff*)**

Yellowish semisolid.  $^1\text{H}$  NMR (400 MHz,  $\text{CDCl}_3$ ):  $\delta$  ppm 7.42-7.37 (m, 4H), 7.02 (t,  $J = 8.4$  Hz, 1H), 6.81 (dd,  $J = 8.4, 4.0$  Hz, 1H), 6.22 (d,  $J = 7.6$  Hz, 1H), 4.78 (s, 1H),

3.28 (s, 3H).  $^{13}\text{C}$  NMR (100 MHz,  $\text{CDCl}_3$ ):  $\delta$  ppm 171.1, 159.9, 157.5, 141.2, 135.0, 131.3, 129.0, 128.0, 122.3 (d,  $J = 8.8$  Hz), 116.6 (d,  $J = 23.8$  Hz), 111.8 (d,  $J = 26.4$  Hz), 109.3 (d,  $J = 8.1$  Hz), 64.6, 61.5, 26.8. HRMS: calcd for  $\text{C}_{16}\text{H}_{11}\text{NO}_2\text{FCINa}$   $[\text{M}+\text{Na}]^+$  : 326.0360, found 326.0353.

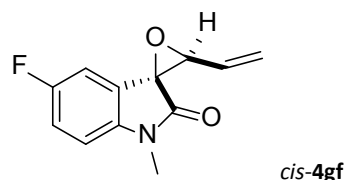

**5-fluoro-1-methyl-3'-vinylspiro[indoline-3,2'-oxiran]-2-one (*cis-4gf*):**

Yellowish semisolid.  $^1\text{H}$  NMR (400 MHz,  $\text{CDCl}_3$ ):  $\delta$  ppm 7.09 (t,  $J = 8.4$  Hz, 1H), 6.88 (d,  $J = 0.8$  Hz, 1H), 6.84 (dd,  $J = 8.4, 3.6$  Hz, 1H), 6.50-6.41 (m, 1H), 5.69 (d,  $J = 17.6$  Hz, 1H), 5.55 (d,  $J = 10.4$  Hz, 1H), 4.01 (d,  $J = 8.4$  Hz, 1H), 3.25 (s, 3H).  $^{13}\text{C}$  NMR (100 MHz,  $\text{CDCl}_3$ ):  $\delta$  ppm 170.7, 160.5, 158.1, 140.4, 130.6, 124.9 (d,  $J = 8.4$  Hz), 123.8, 116.4 (d,  $J = 23.5$  Hz), 109.9 (d,  $J = 25.7$  Hz), 109.4 (d,  $J = 8.1$  Hz), 67.0, 61.7, 16.8. HRMS: calcd for  $\text{C}_{12}\text{H}_{10}\text{FNO}_2\text{Na}$   $[\text{M}+\text{Na}]^+$  : 242.0593, found 242.0599.

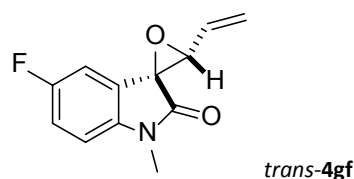

**5-fluoro-1-methyl-3'-vinylspiro[indoline-3,2'-oxiran]-2-one (*trans-4gf*):**

Yellowish solid. mp: 137.0-137.3 °C.  $^1\text{H}$  NMR (400 MHz,  $\text{CDCl}_3$ ):  $\delta$  ppm 7.12 (t,  $J = 8.8$  Hz, 1H), 6.96 (d,  $J = 7.6$  Hz, 1H), 6.86 (dd,  $J = 8.4, 3.6$  Hz, 1H), 5.98 (ddd,  $J = 17.3, 10.4, 7.0$  Hz, 1H), 5.76 (d,  $J = 17.2$  Hz, 1H), 5.62 (d,  $J = 10.8$  Hz, 1H), 4.16 (d,  $J = 6.8$  Hz, 1H), 3.27 (s, 3H).  $^{13}\text{C}$  NMR (100 MHz,  $\text{CDCl}_3$ ):  $\delta$  ppm 171.5, 160.1, 157.7, 141.2, 129.9, 123.6, 122.9, 122.8, 116.4 (d,  $J = 23.5$  Hz), 112.3 (d,  $J = 26.4$  Hz), 109.4 (d,  $J = 8.1$  Hz), 65.2, 61.6, 26.8. HRMS: calcd for  $\text{C}_{12}\text{H}_{10}\text{FNO}_2\text{Na}$   $[\text{M}+\text{Na}]^+$  : 242.0593, found 242.0592.

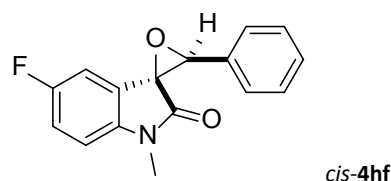

**5-fluoro-1-methyl-3'-phenylspiro[indoline-3,2'-oxiran]-2-one (*cis-4hf*):**



Yellowish semisolid.  $^1\text{H}$  NMR (400 MHz,  $\text{CDCl}_3$ ):  $\delta$  ppm 7.61 (d,  $J = 7.2\text{Hz}$ , 2H), 7.42-7.36 (m, 3H), 7.12 (t,  $J = 8.4\text{ Hz}$ , 1H), 7.00 (d,  $J = 7.2\text{ Hz}$ , 1H), 6.83-6.81 (m, 1H), 4.64 (s, 1H), 3.15 (s, 3H).  $^{13}\text{C}$  NMR (100 MHz,  $\text{CDCl}_3$ ):  $\delta$  ppm 169.6, 160.5, 158.1, 140.5, 131.3, 129.0, 127.6 (d,  $J = 30.0\text{ Hz}$ ), 125.3 (d,  $J = 8.4\text{ Hz}$ ), 116.4 (d,  $J = 23.6\text{ Hz}$ ), 109.9 (d,  $J = 25.4\text{ Hz}$ ), 109.3 (d,  $J = 7.9\text{ Hz}$ ), 67.7, 61.9, 26.6. HRMS: calcd for  $\text{C}_{16}\text{H}_{12}\text{FNO}_2\text{Na}$   $[\text{M}+\text{Na}]^+$  : 292.0744, found 292.0764.

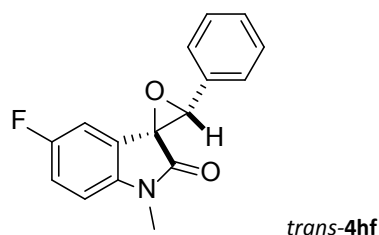

**5-fluoro-1-methyl-3'-phenylspiro[indoline-3,2'-oxiran]-2-one (*trans-4hf*):**

Yellowish semisolid.  $^1\text{H}$  NMR (400 MHz,  $\text{CDCl}_3$ ):  $\delta$  ppm 7.43-7.40 (m, 5H), 7.00 (t,  $J = 8.4\text{ Hz}$ , 1H), 6.80-6.78 (m, 1H), 6.22 (d,  $J = 8.0\text{ Hz}$ , 1H), 4.84 (s, 1H), 3.29 (s, 3H).  $^{13}\text{C}$  NMR (100 MHz,  $\text{CDCl}_3$ ):  $\delta$  ppm 171.4, 159.9, 157.5, 141.2, 132.7, 128.8 (d,  $J = 36.2\text{ Hz}$ ), 122.7 (d,  $J = 8.8\text{ Hz}$ ), 122.7, 122.6, 116.4 (d,  $J = 23.8\text{ Hz}$ ), 111.9 (d,  $J = 26.3\text{ Hz}$ ), 109.1 (d,  $J = 8.1\text{ Hz}$ ), 65.2, 61.5, 26.8. HRMS: calcd for  $\text{C}_{16}\text{H}_{12}\text{NO}_2\text{FNa}$   $[\text{M}+\text{Na}]^+$  : 292.0750, found 292.0733.

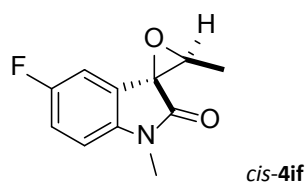

**5-fluoro-1,3'-dimethylspiro[indoline-3,2'-oxiran]-2-one (*cis-4if*):**

Yellowish solid. mp: 143.5-143.9 °C.  $^1\text{H}$  NMR (400 MHz,  $\text{CDCl}_3$ ):  $\delta$  ppm 7.07 (t,  $J = 8.8\text{ Hz}$ , 1H), 6.82 (d,  $J = 7.6\text{ Hz}$ , 2H), 3.71-3.68 (m, 1H), 3.25 (s, 3H), 1.73 (d,  $J = 4.0\text{ Hz}$ , 3H).  $^{13}\text{C}$  NMR (100 MHz,  $\text{CDCl}_3$ ):  $\delta$  ppm 171.4, 160.5, 158.1, 140.3, 125.88 (d,  $J = 8.4\text{ Hz}$ ), 116.1 (d,  $J = 23.8\text{ Hz}$ ), 109.5 (dd,  $J = 61.3, 16.9\text{ Hz}$ ), 63.4, 59.6, 26.7, 12.2. HRMS: calcd for  $\text{C}_{11}\text{H}_{10}\text{FNO}_2\text{Na}$   $[\text{M}+\text{Na}]^+$  : 230.0588, found 230.0604.

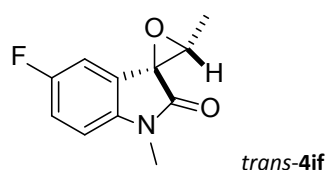

**5-fluoro-1,3'-dimethylspiro[indoline-3,2'-oxiran]-2-one (*trans*-4if):**

Yellowish semisolid. <sup>1</sup>H NMR (400 MHz, CDCl<sub>3</sub>): δ ppm 7.12 (t, *J* = 8.8 Hz, 1H), 6.95 (d, *J* = 7.6 Hz, 1H), 6.88-6.85 (m, 1H), 3.79 (q, *J* = 5.2 Hz, 1H), 3.26 (s, 3H), 1.59 (d, *J* = 5.2 Hz, 3H). <sup>13</sup>C NMR (100 MHz, CDCl<sub>3</sub>): δ ppm 172.3, 160.2, 157.8, 141.3, 123.6 (d, *J* = 8.4 Hz), 116.2 (d, *J* = 23.8 Hz), 112.2 (d, *J* = 25.7 Hz), 109.3 (d, *J* = 8.1 Hz), 61.5, 60.5, 26.7, 13.6. HRMS: calcd for C<sub>11</sub>H<sub>10</sub>FNO<sub>2</sub>Na [M+Na]<sup>+</sup> : 230.0588, found 230.0593.

cmq-3214  
boss HWH  
cmq-3214

7.507  
7.503  
7.487  
7.482  
7.463  
7.459  
7.442  
7.346  
7.329  
7.325  
7.310  
7.294  
7.273  
7.268  
7.259  
6.937  
6.896  
6.835  
6.814  
6.787  
6.766

4.197  
4.176

3.248

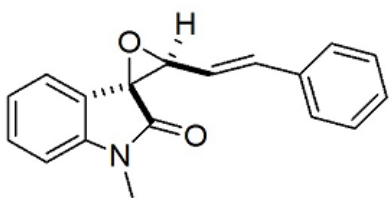

**cis-4aa**

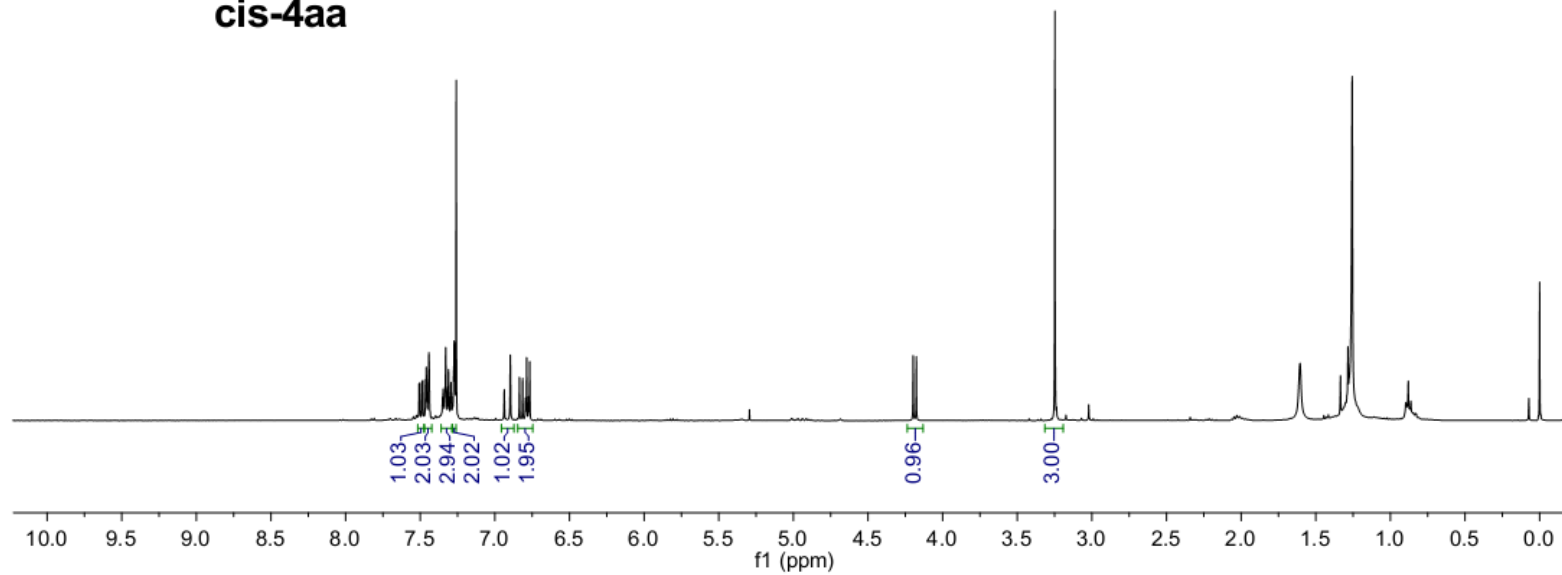

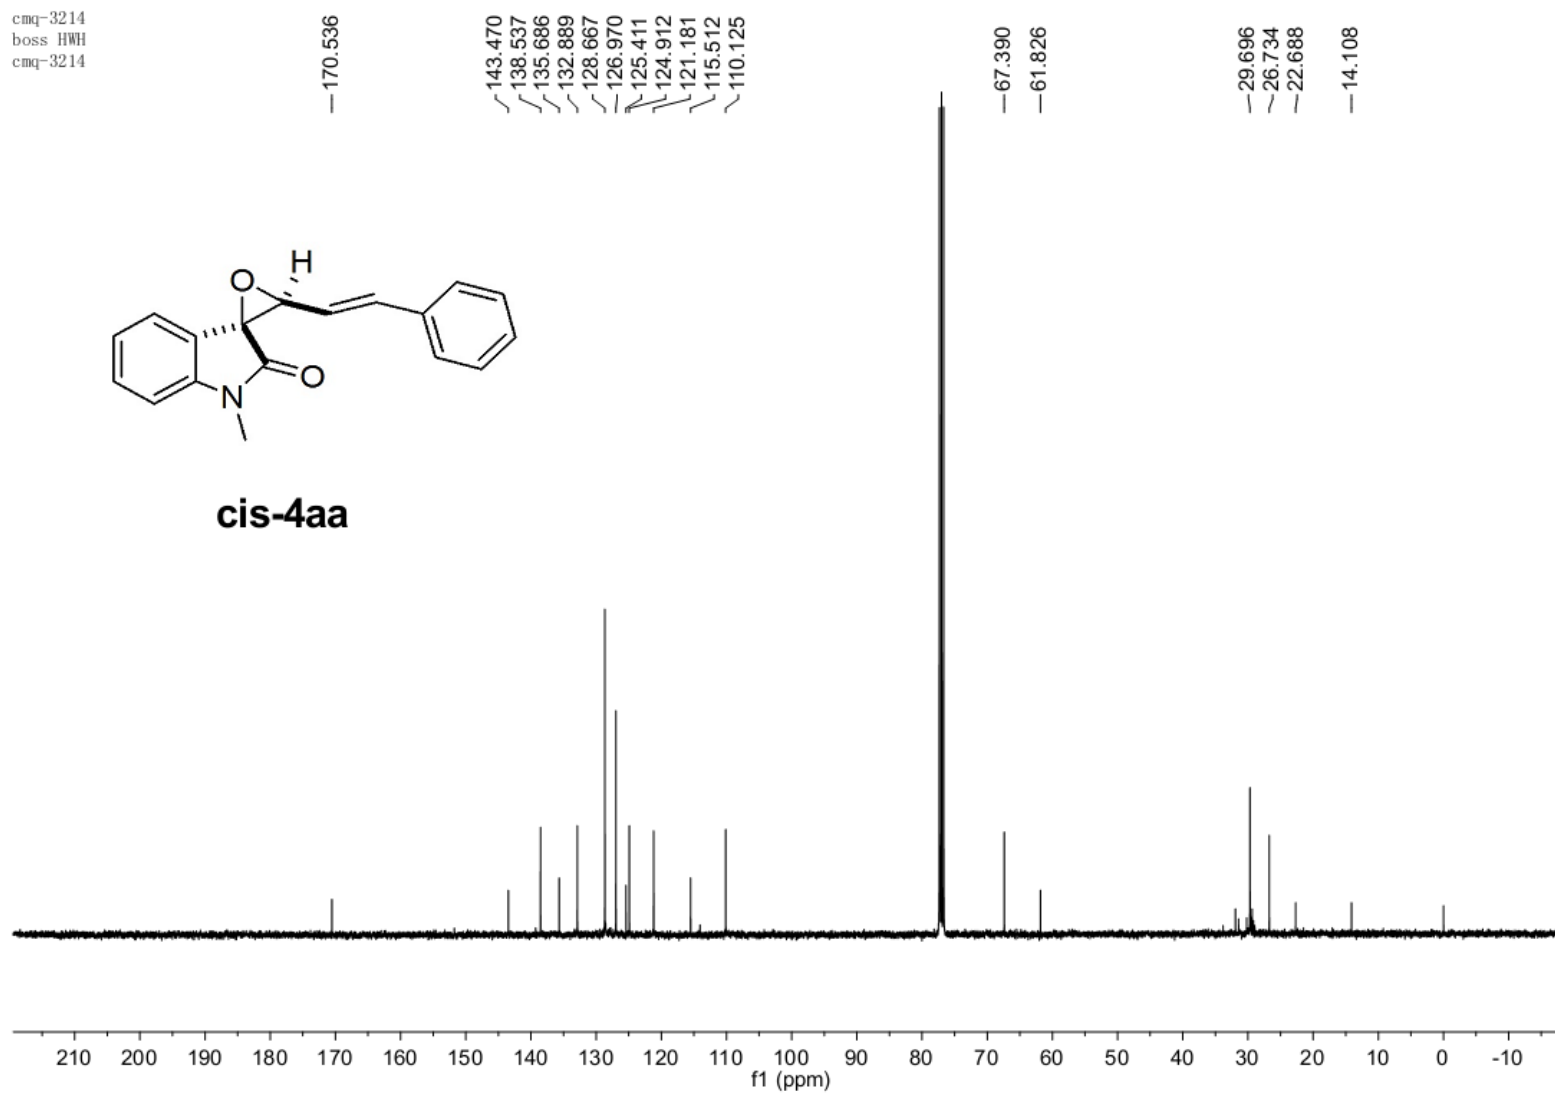

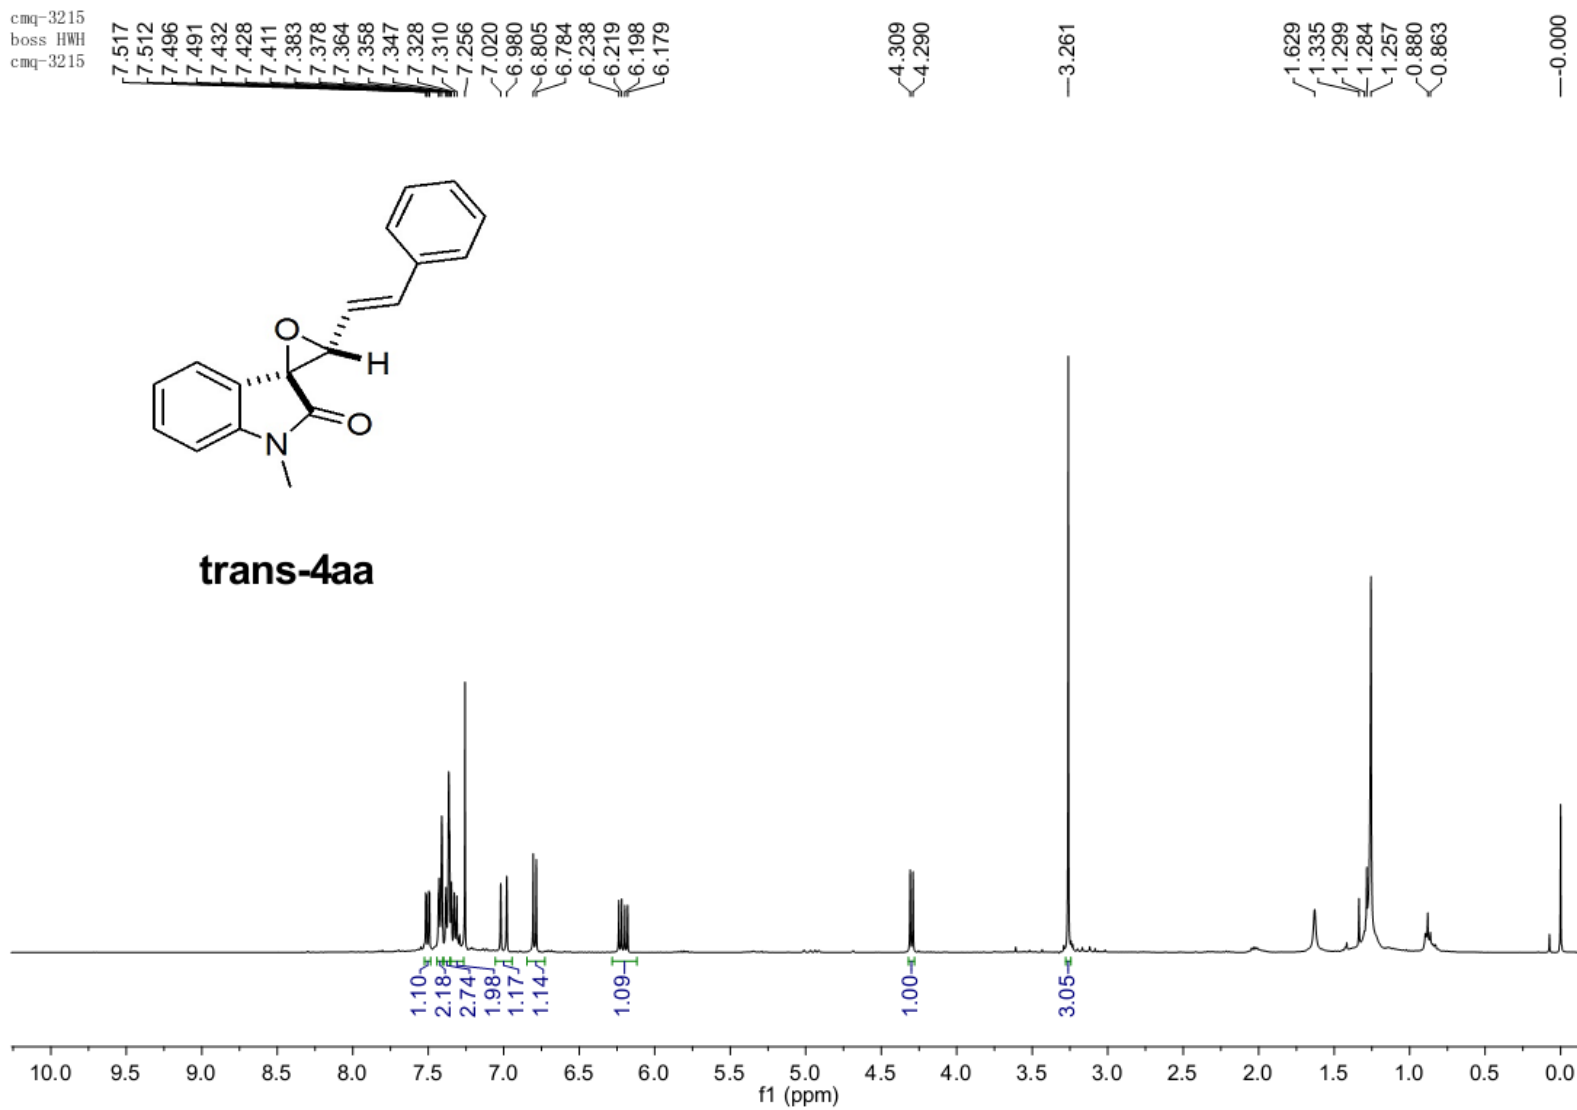

cmq-3215  
boss HWH  
cmq-3215

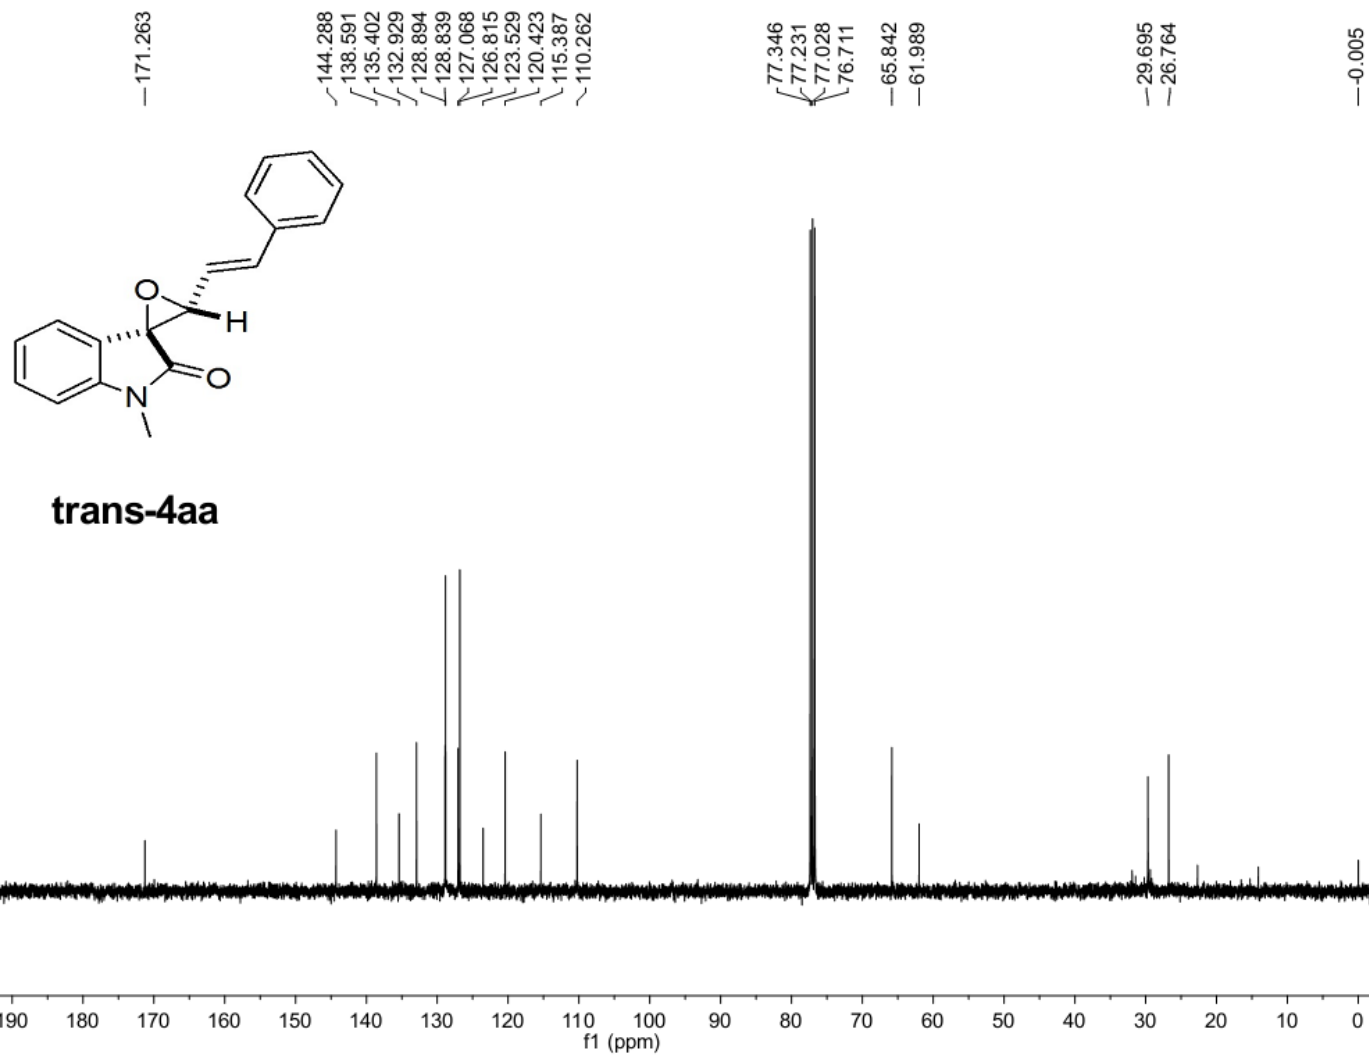

cmq353-2  
boss HWH  
cmq313-2

7.460  
7.442  
7.337  
7.319  
7.300  
7.280  
7.268  
7.262  
7.255  
7.174  
7.154  
6.976  
6.920  
6.881  
6.864  
6.823  
6.793  
6.773

4.184  
4.181  
4.167  
4.164

—3.240

—2.347

—1.256

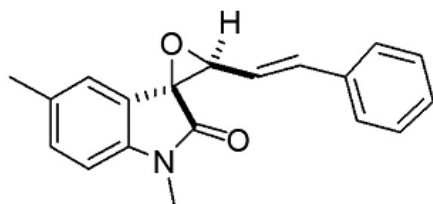

**cis-4ab**

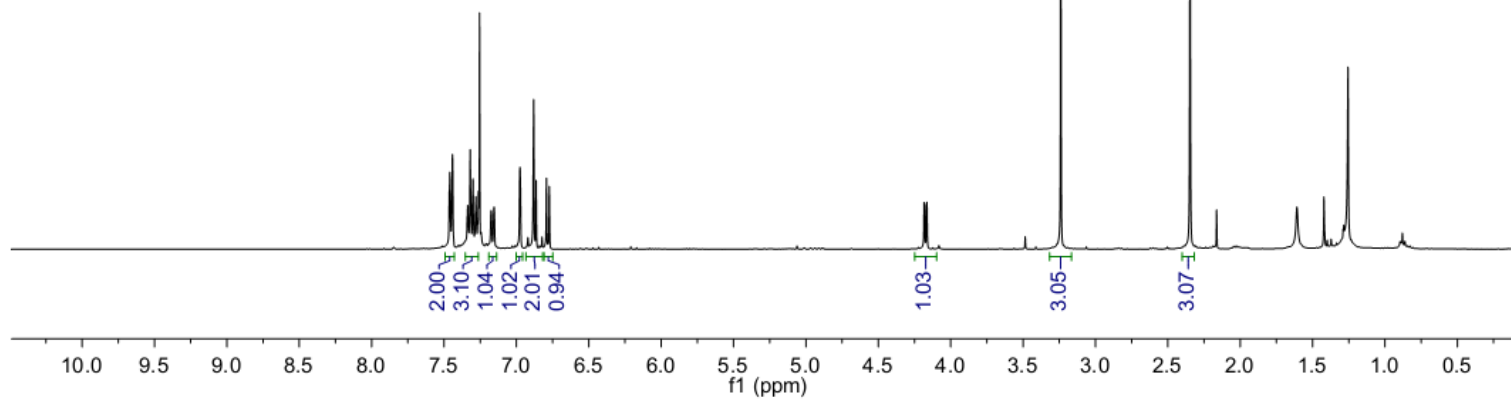

cmq353-2  
boss HWH  
cmq313-2

— 171.076  
— 142.186  
— 137.942  
— 135.879  
— 132.495  
— 130.398  
— 128.624  
— 128.493  
— 126.937  
— 123.277  
— 122.380  
— 121.907  
— 108.471

— 77.346  
— 77.231  
— 77.029  
— 76.711  
— 67.135  
— 62.277

— 29.700  
— 26.647  
— 21.020

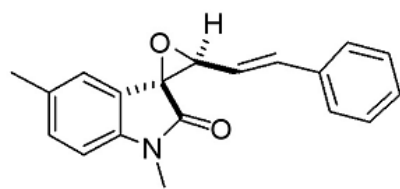

**cis-4ab**

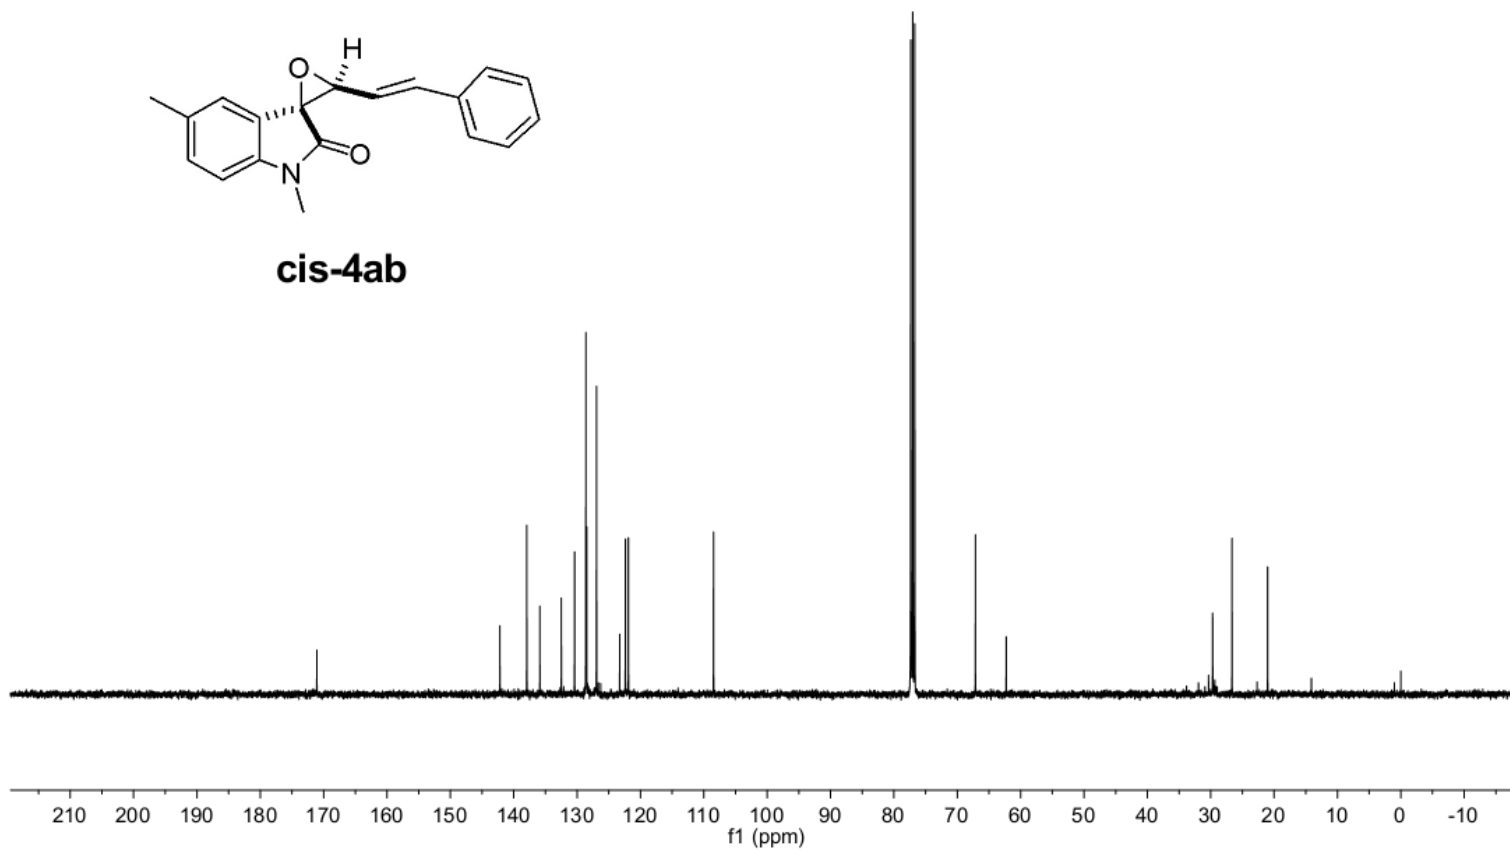



cmq353-3  
boss HWH  
cmq313-3

7.423  
7.420  
7.402  
7.370  
7.352  
7.333  
7.312  
7.294  
7.254  
7.184  
7.165  
7.103  
7.003  
6.963  
6.817  
6.797  
6.311  
6.292  
6.271  
6.252

4.293  
4.274

3.255

2.341

1.256

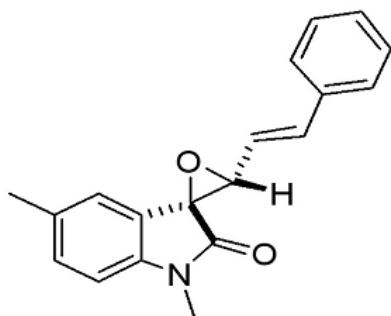

**trans-4ab**

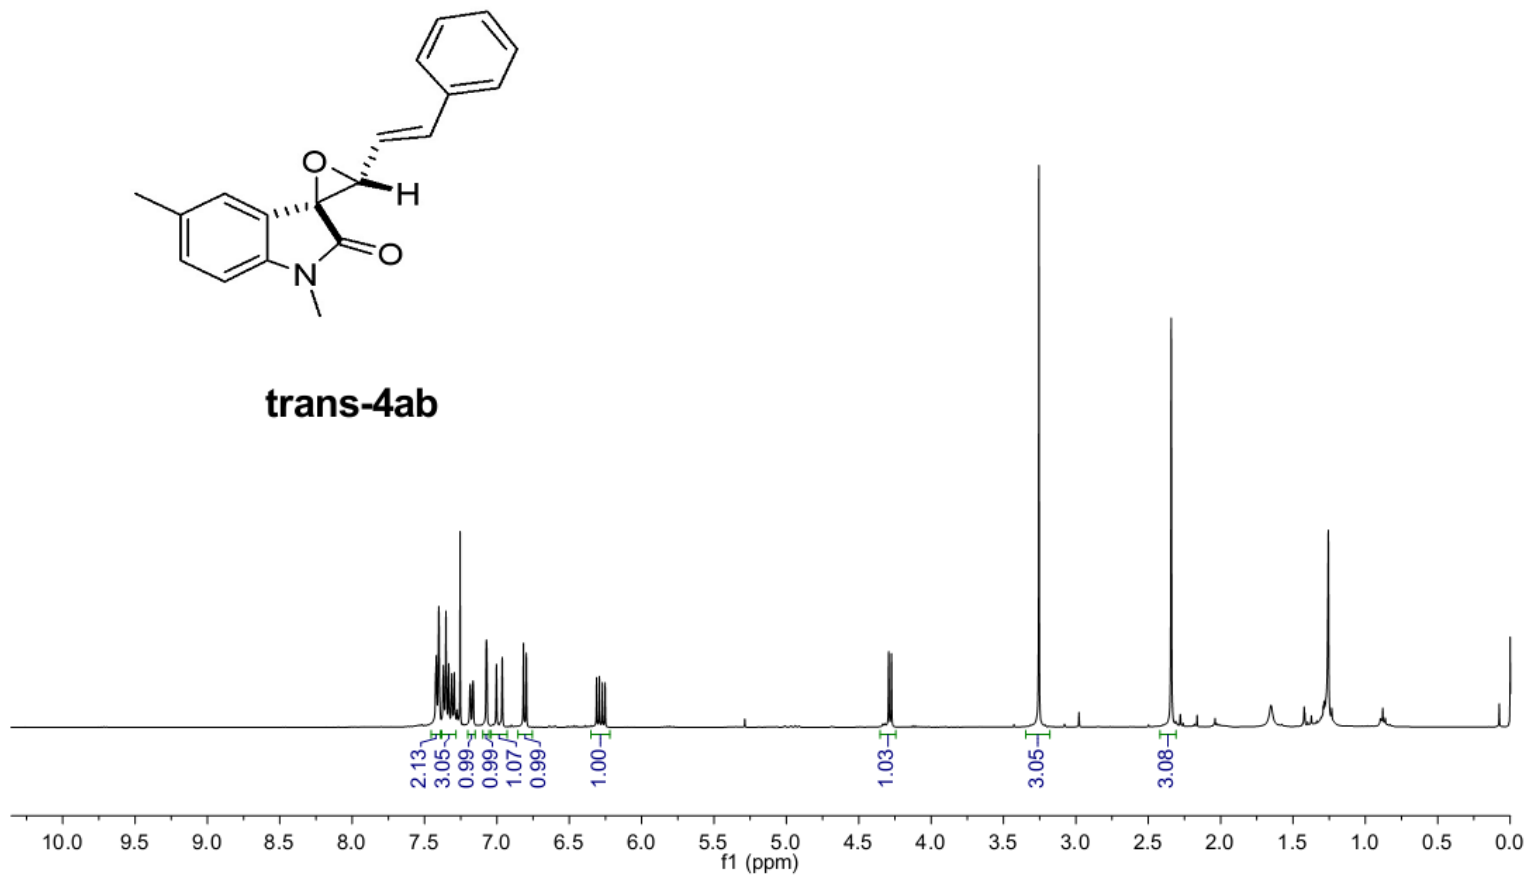

cmq353-3  
boss HWH  
cmq313-3

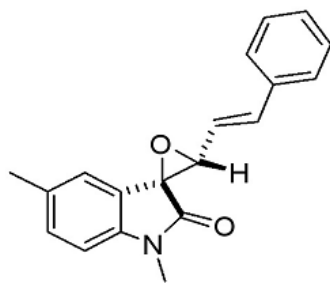

**trans-4ab**

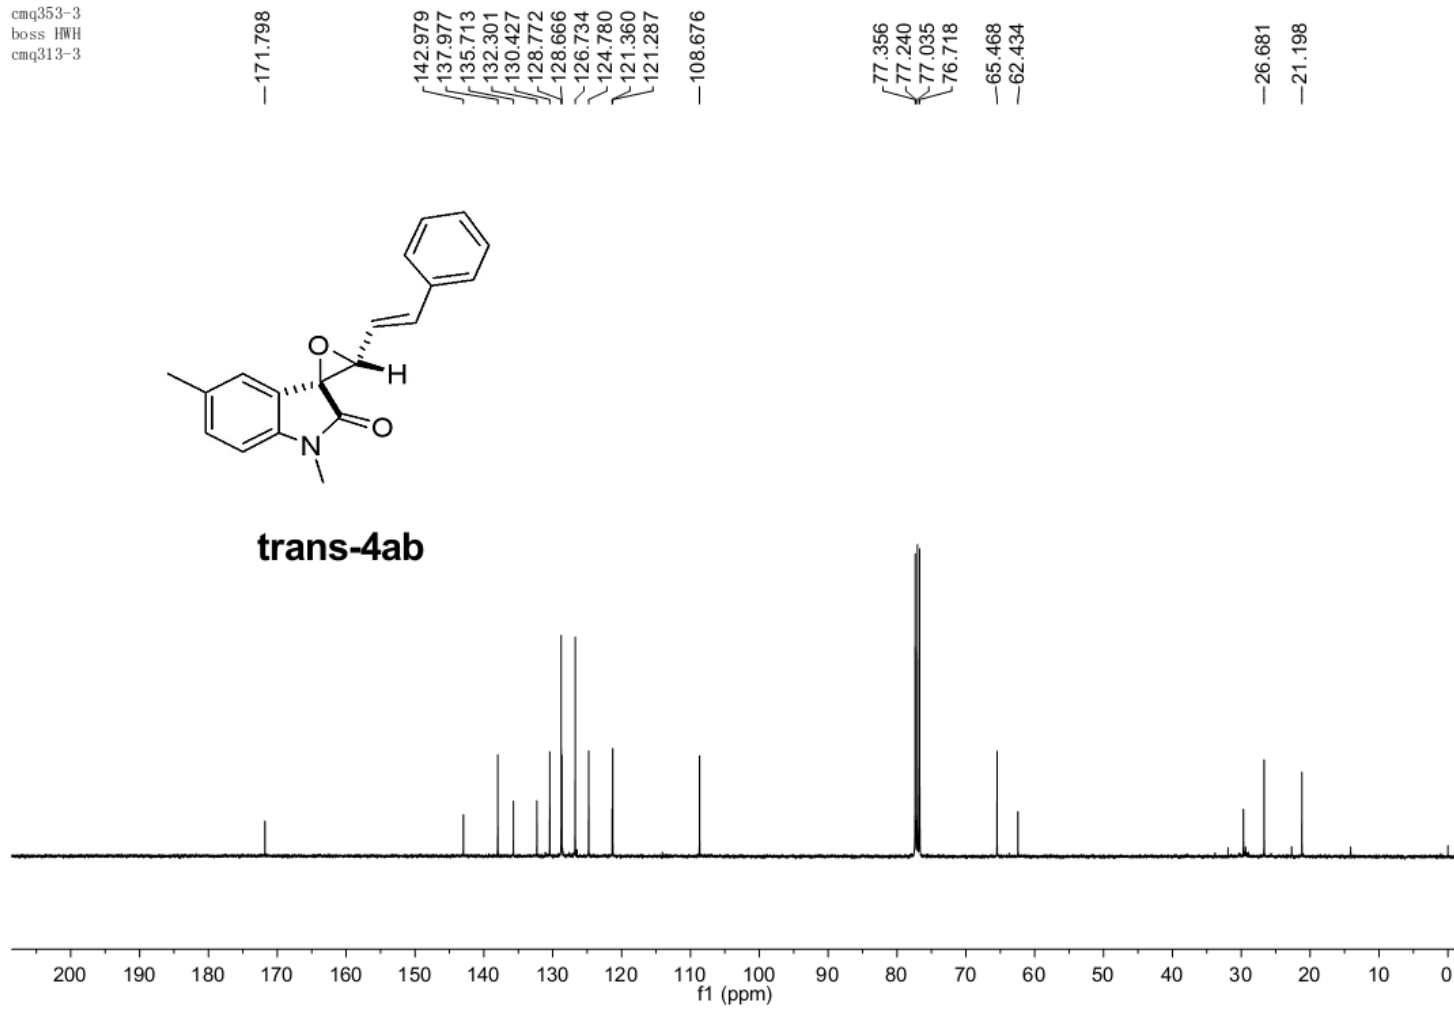

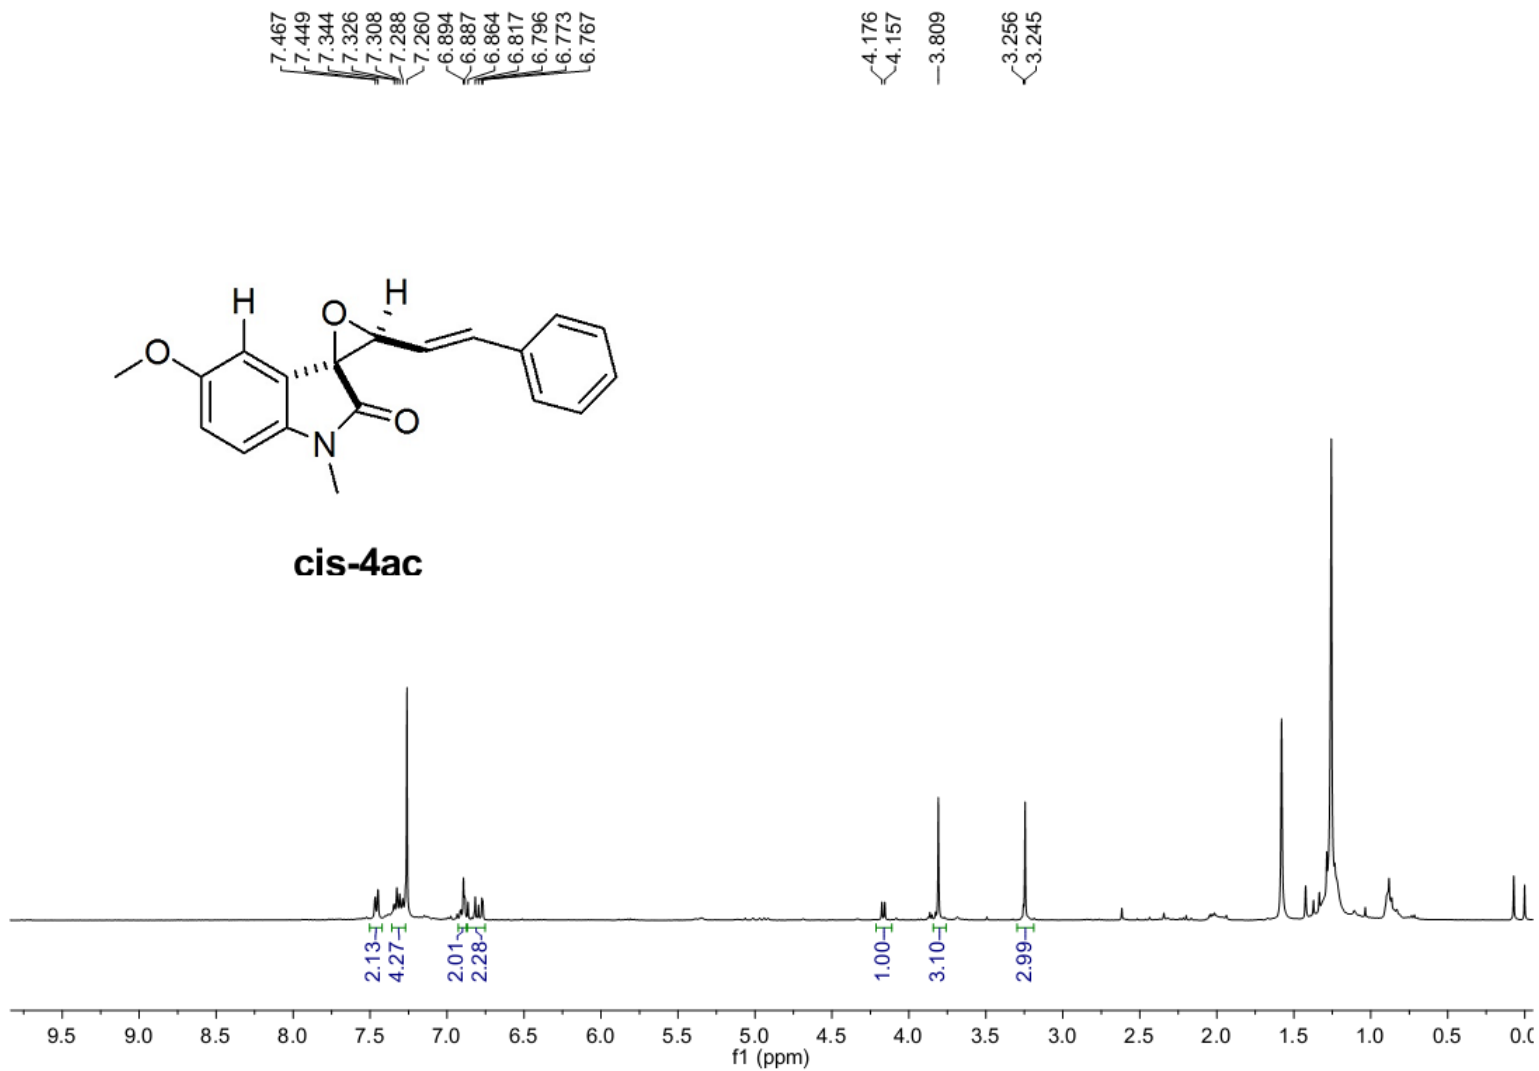

CMQ-5-OCH3-A  
boss boss a  
CMQ-5-OCH3-A

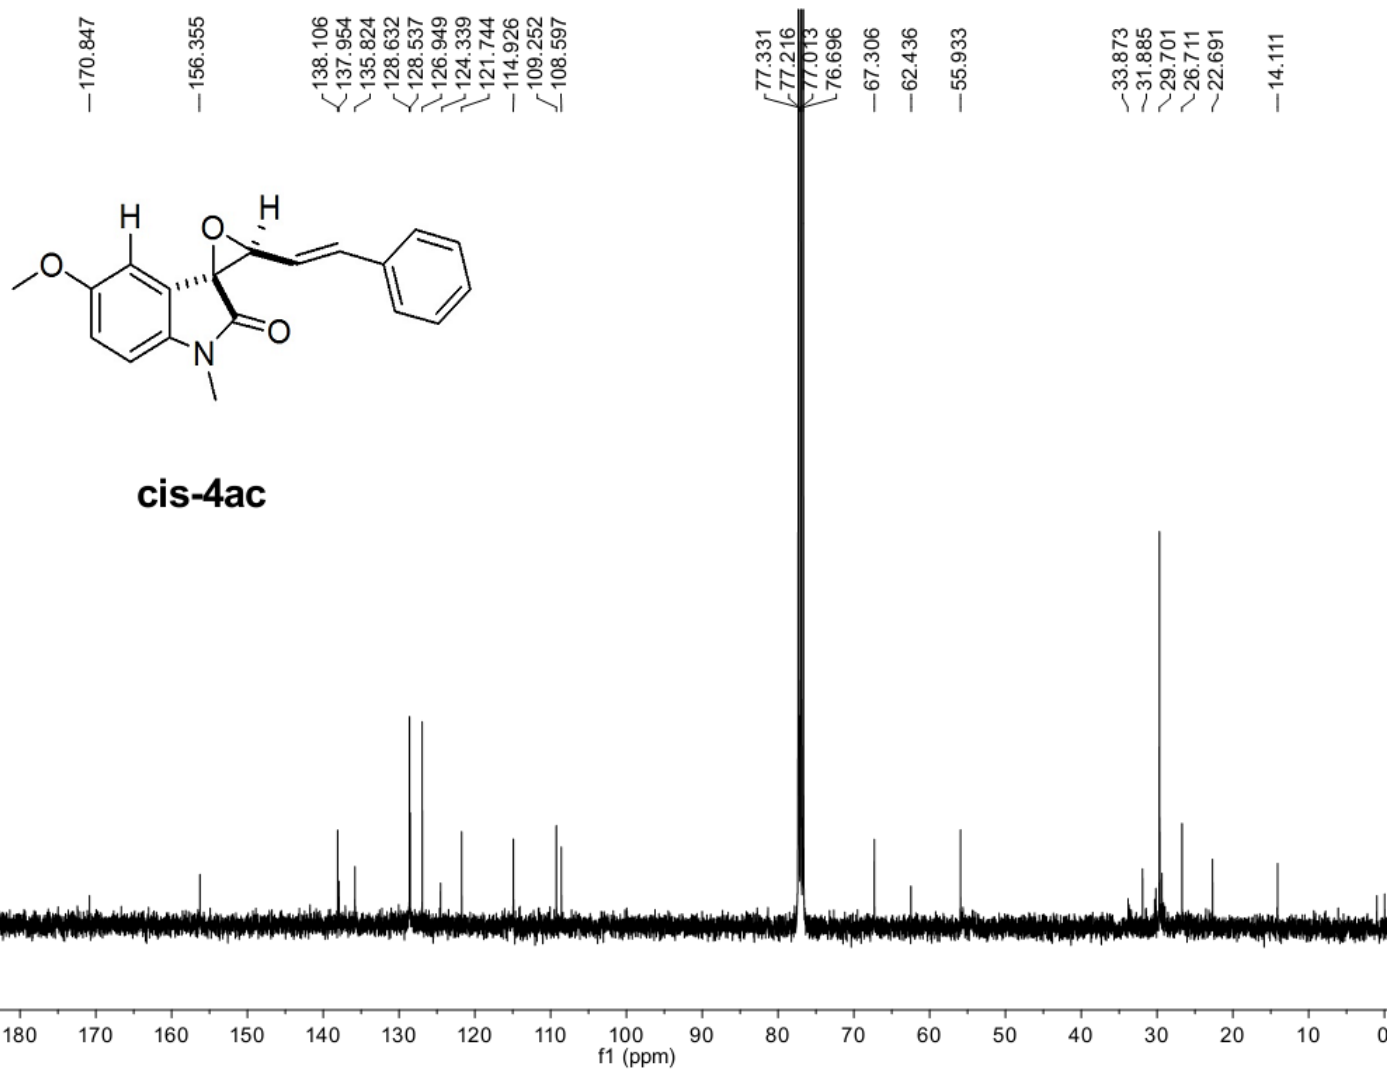

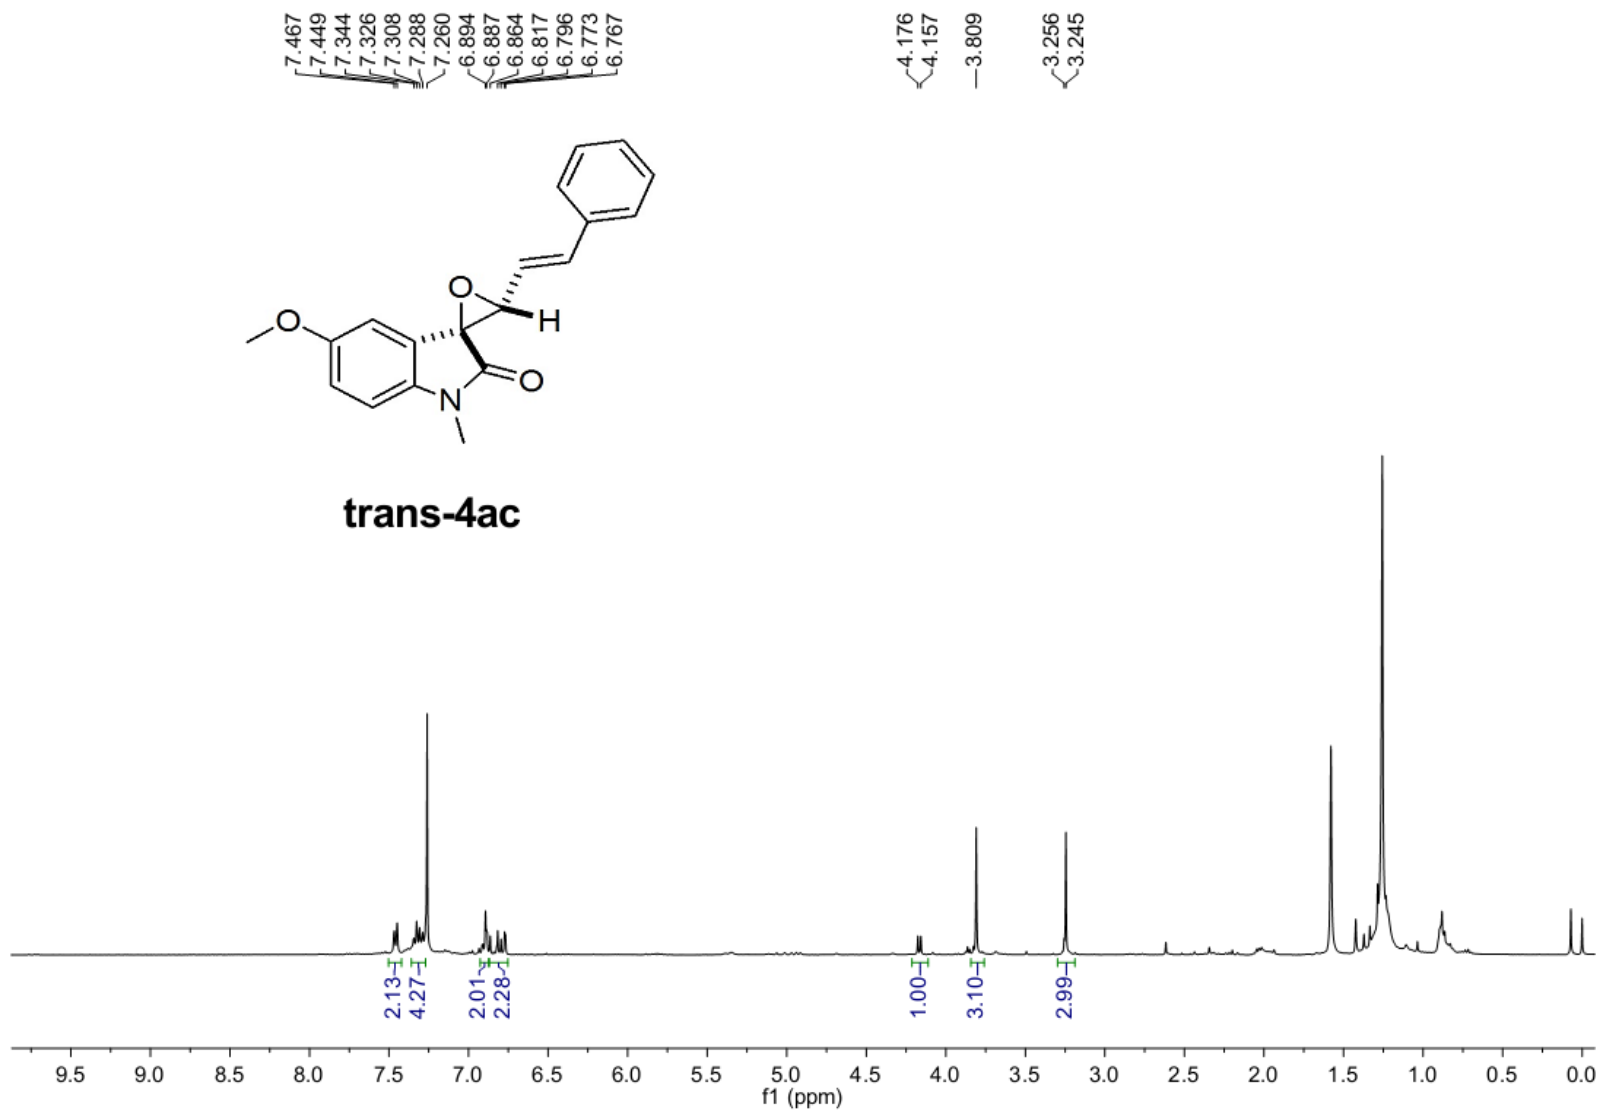

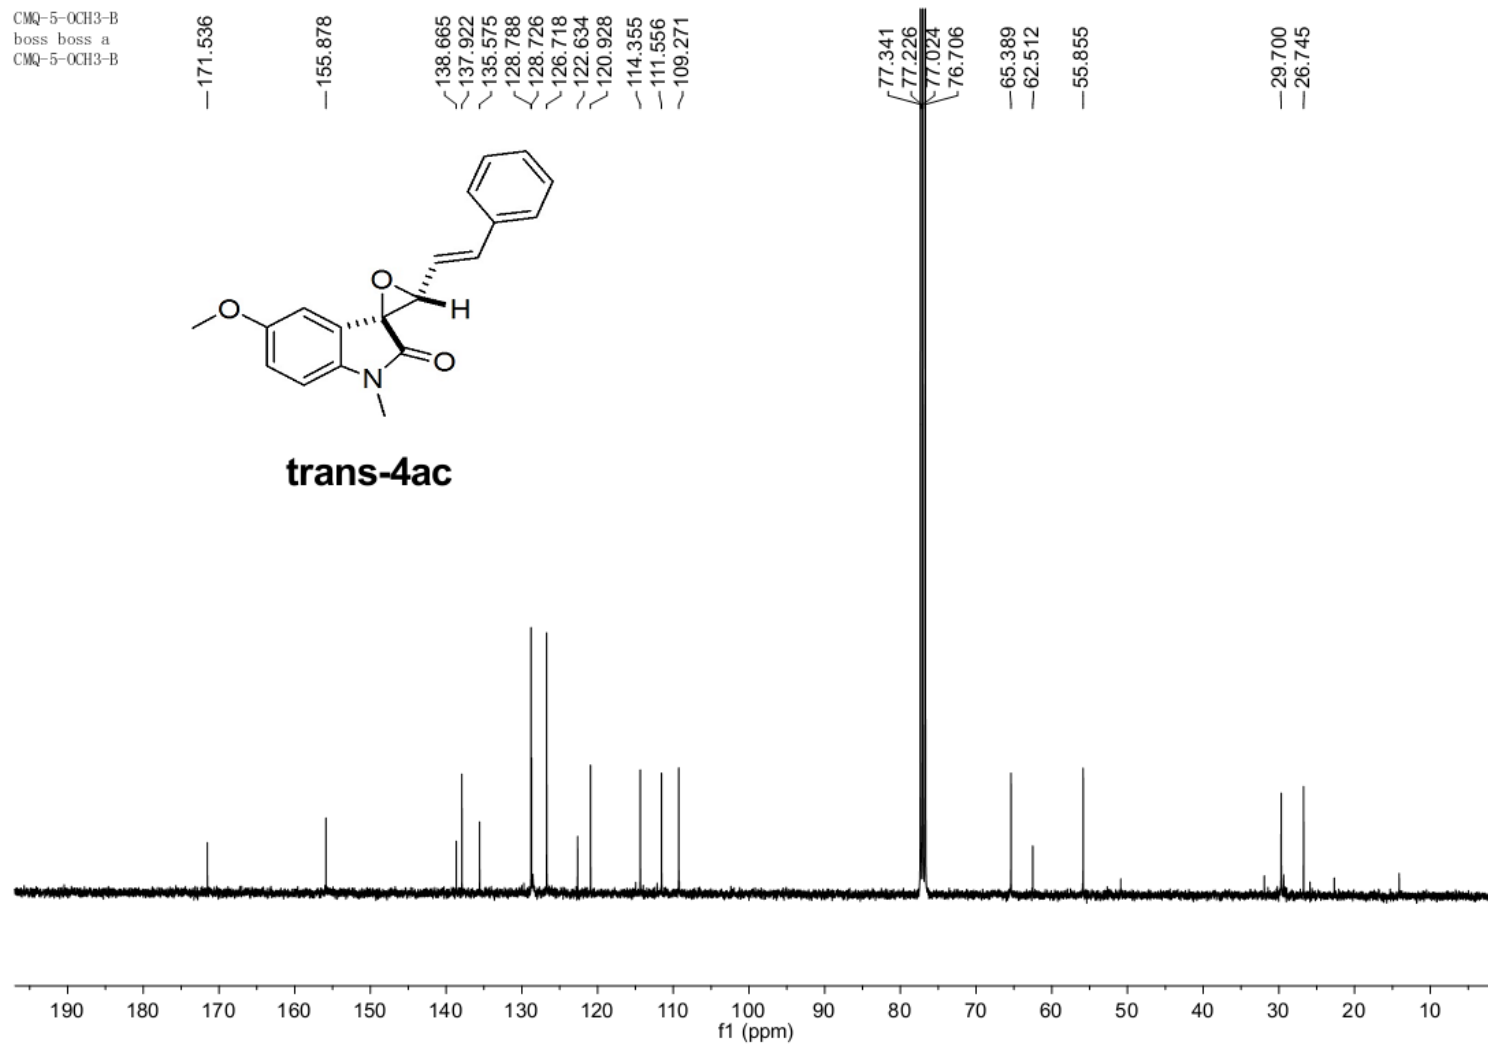

CMQ3412  
boss HWH  
CMQ3412

7.723  
7.510  
7.490  
7.447  
7.331  
7.314  
7.262  
6.940  
6.900  
6.836  
6.815  
6.792  
6.774

4.379  
4.364

3.252

1.567  
1.258

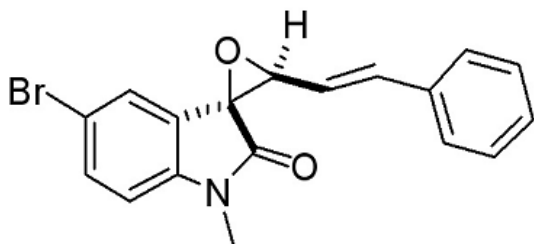

**cis-4ad**

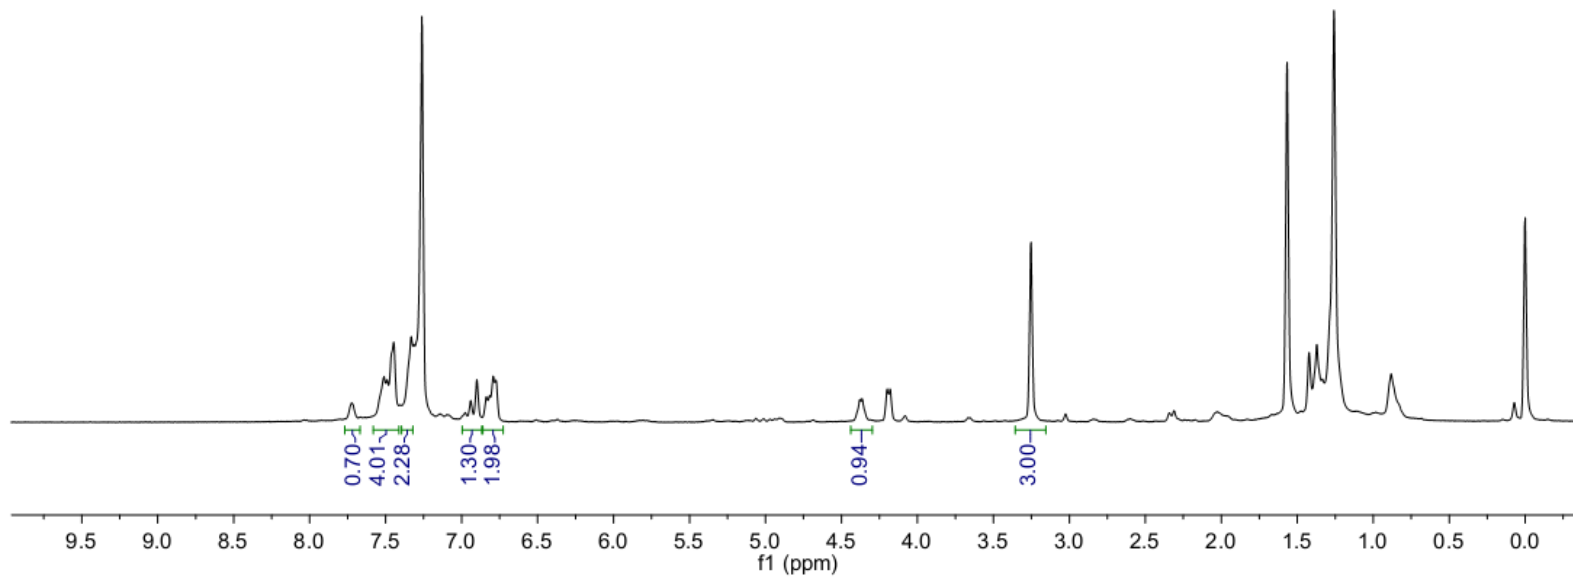

CMQ3412  
boss HWH  
CMQ3412

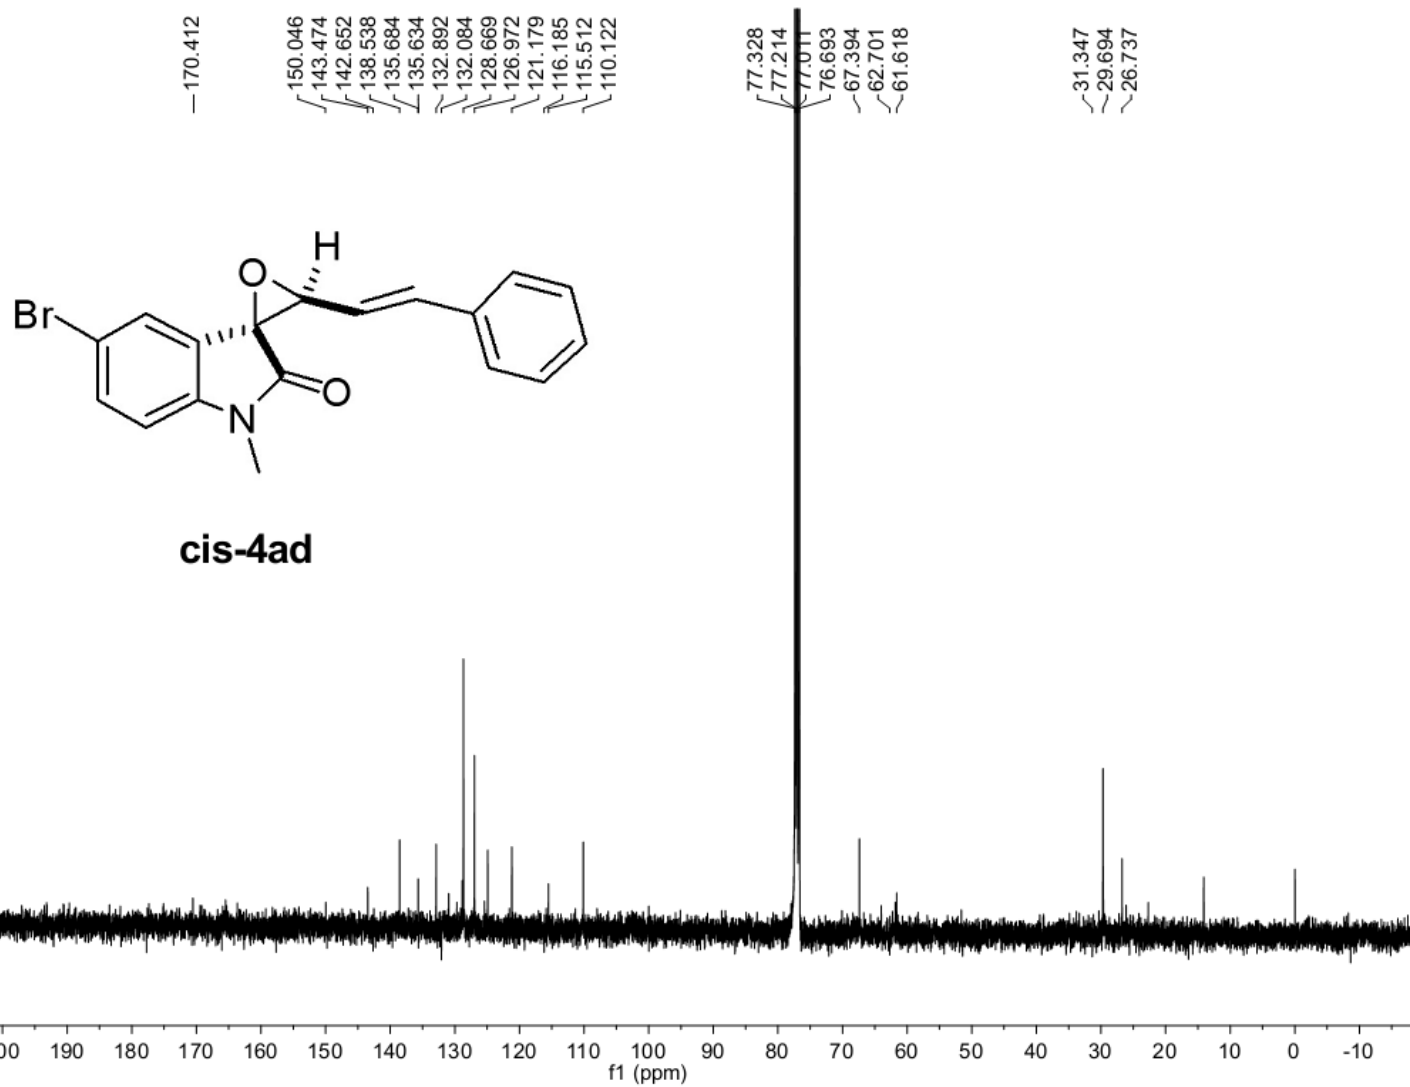



CMQ3413  
boss boss hwh  
cmq3413

7.520  
7.500  
7.429  
7.413  
7.365  
7.260  
7.024  
6.984  
6.811  
6.790  
6.240  
6.223  
6.201  
6.183

—5.294

4.310  
4.293

—3.266

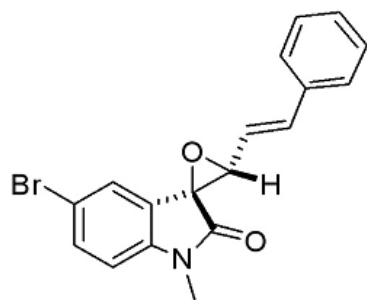

**trans-4ad**

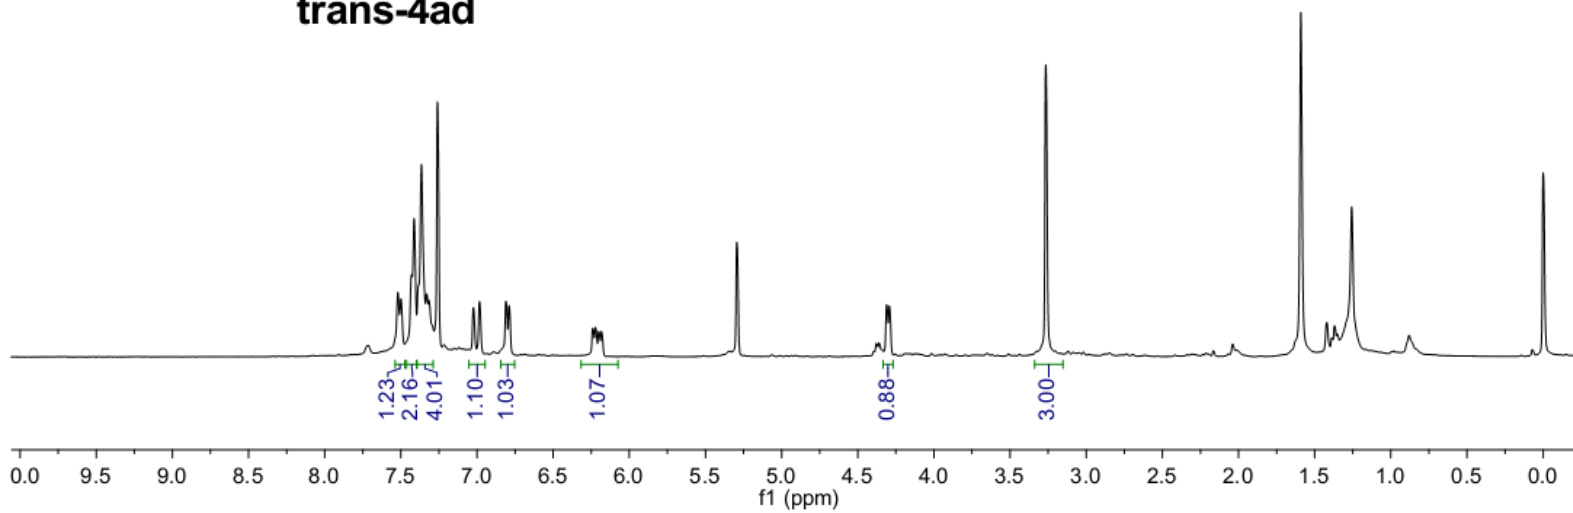

CMQ3413  
boss boss hwh  
cmq3413

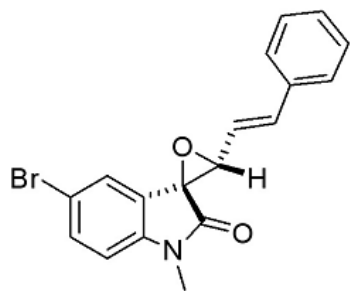

**trans-4ad**

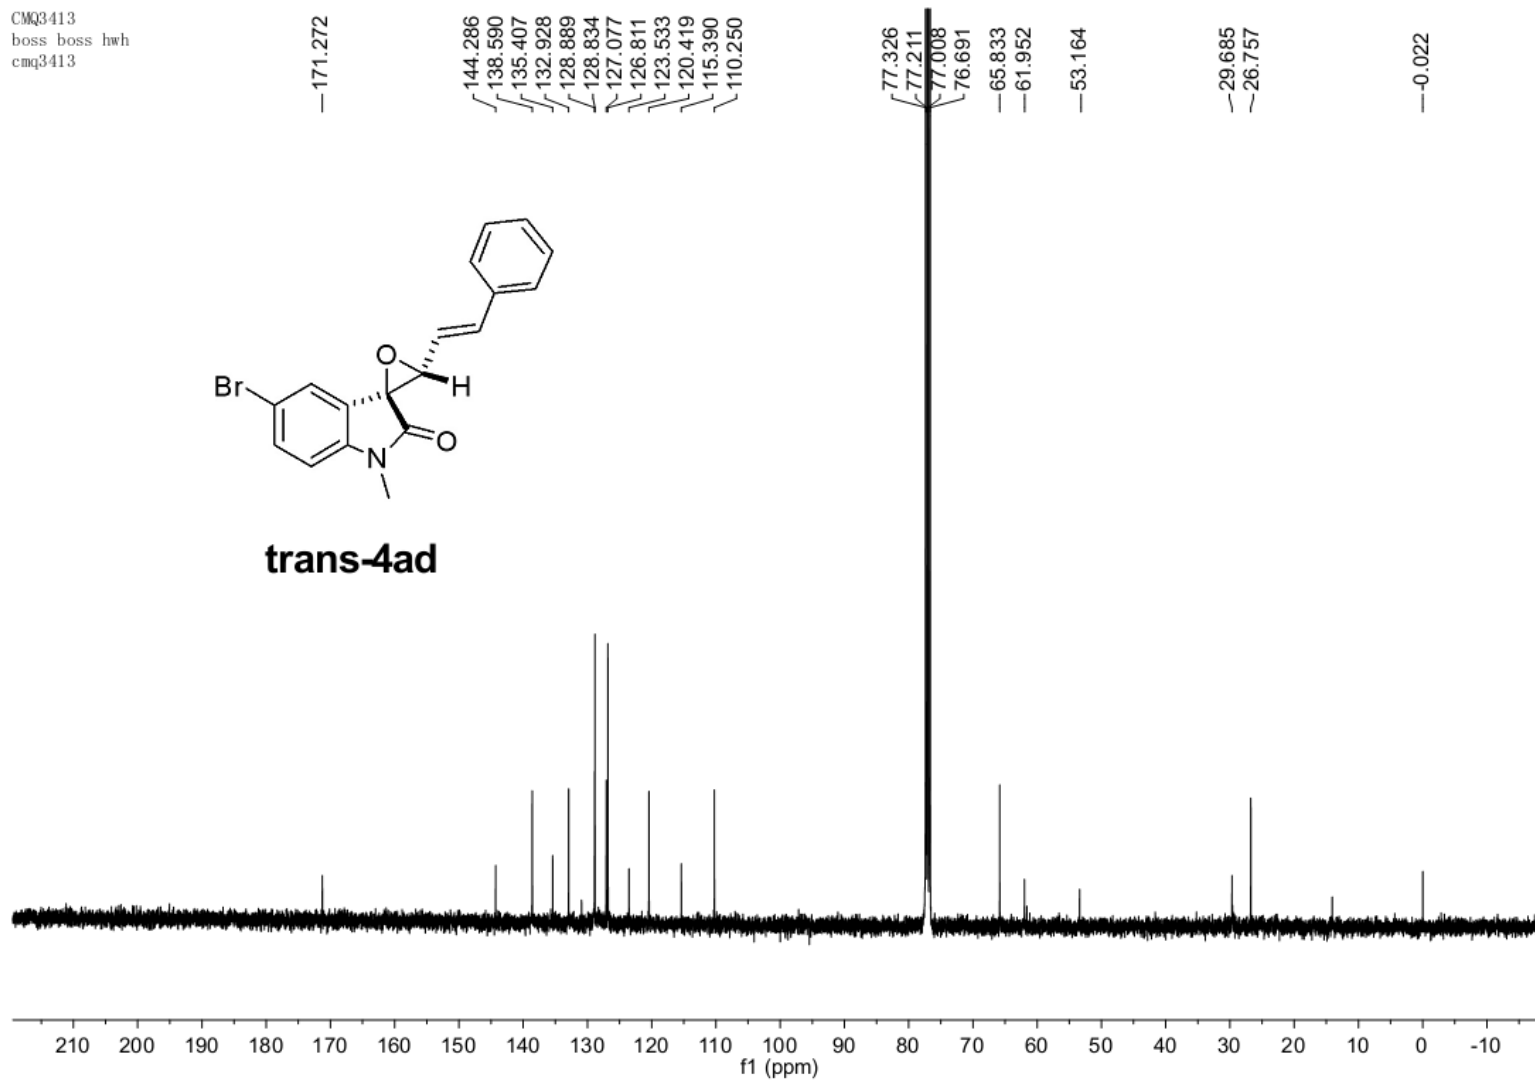

cmq-3343  
boss HWH  
cmq-3342

7.381  
7.363  
7.270  
7.250  
7.231  
7.214  
7.198  
7.180  
7.054  
6.858  
6.818  
6.763  
6.745  
6.726  
6.703  
5.972

4.117  
4.096

3.170

1.529

1.181

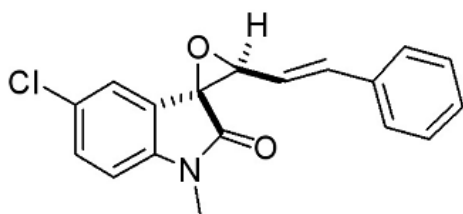

**cis-4ae**

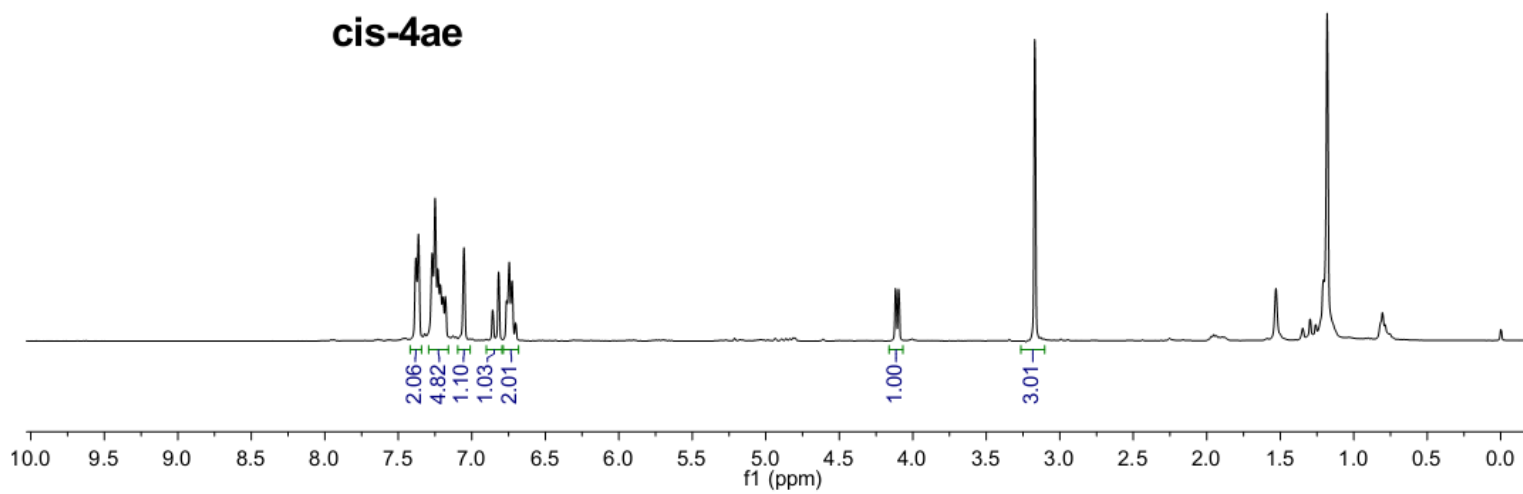

cmq-3342  
boss boss a  
CMQ-3342 CDCL3 13C

—170.650  
142.983  
138.517  
135.694  
129.987  
128.666  
128.403  
126.969  
125.070  
122.164  
121.212  
—109.663

77.349  
77.031  
76.714  
—67.363  
—61.920

—29.700  
—26.752

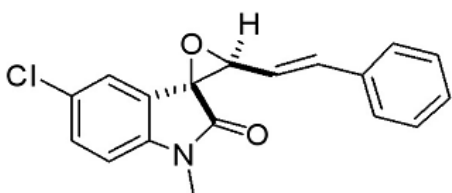

**cis-4ae**

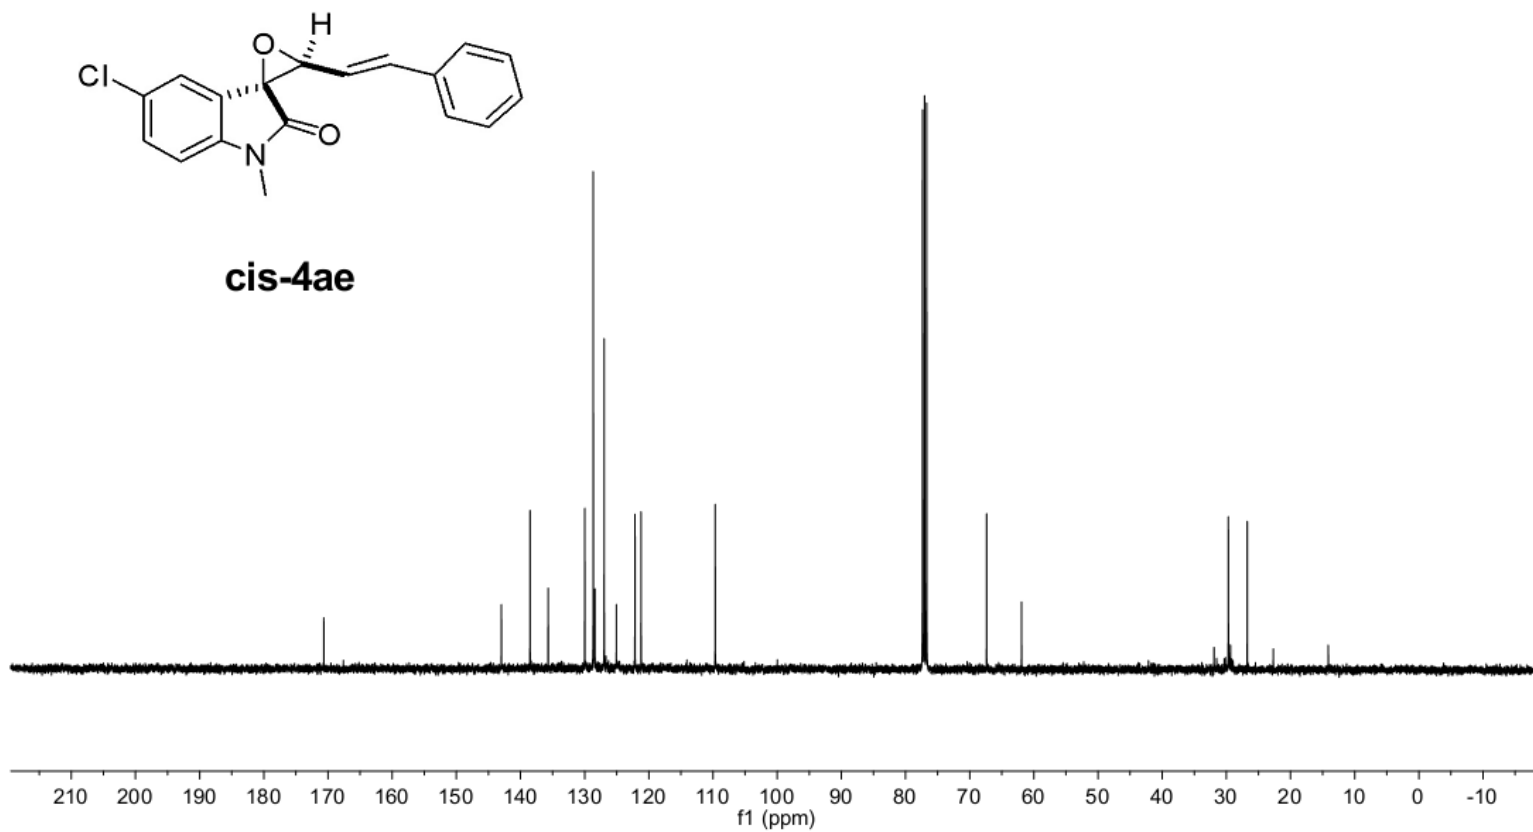

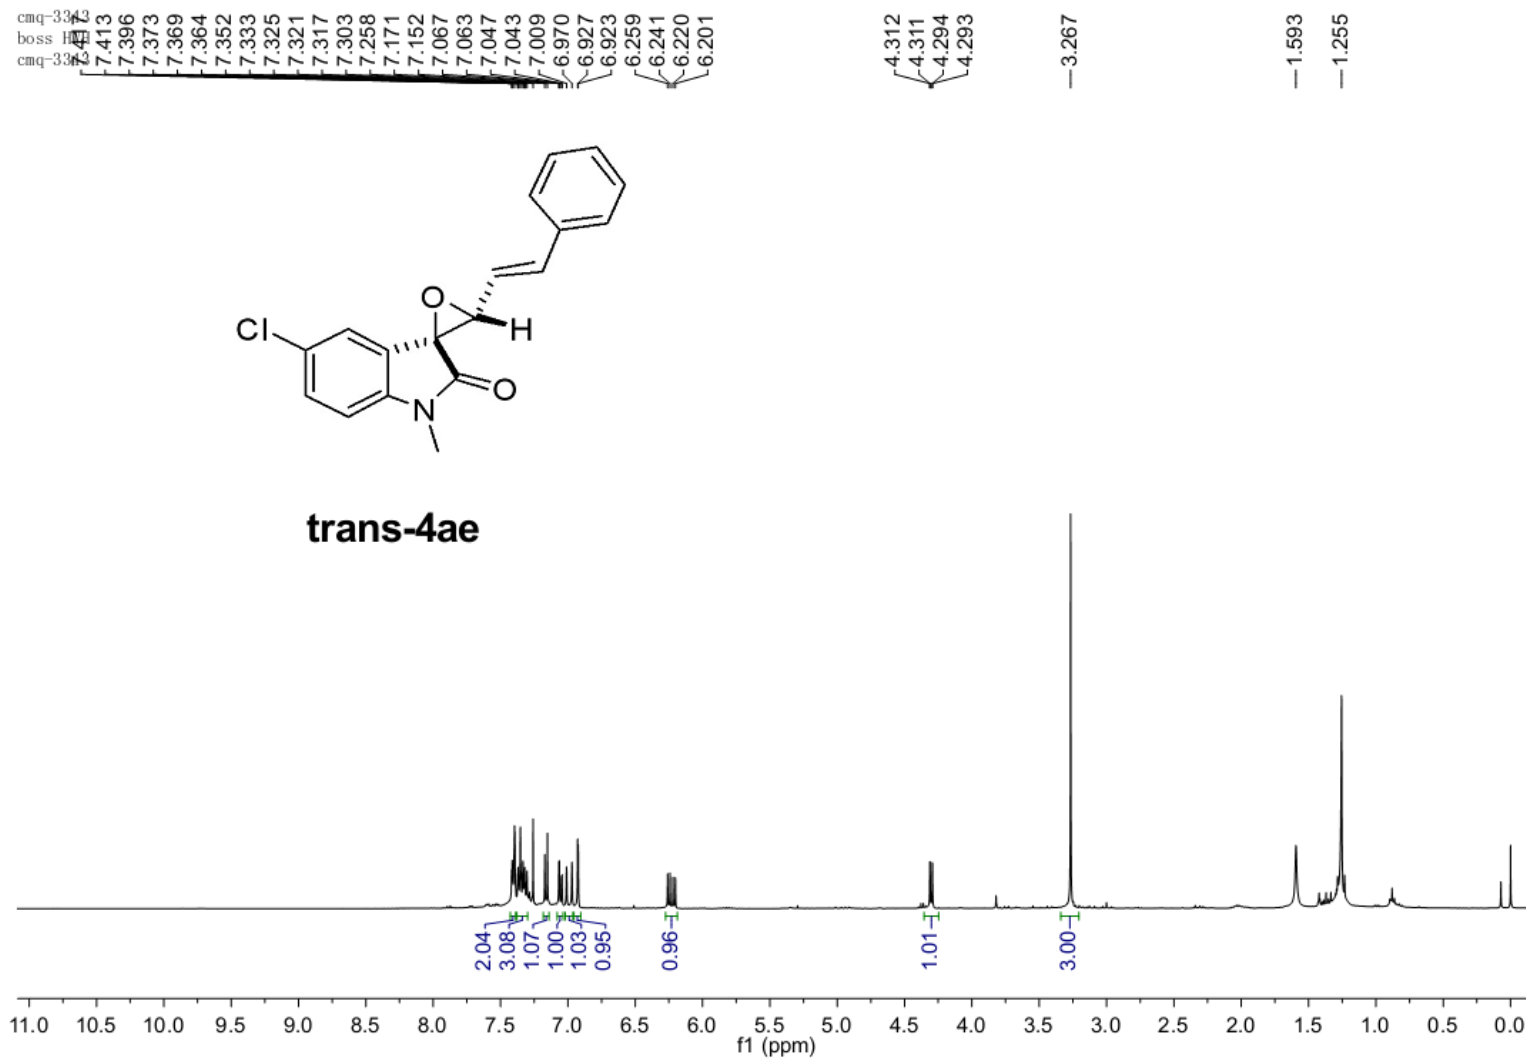

cmq-3343  
boss boss a  
CMQ-3343 CDCL3 13C

—171.379

143.803  
138.553  
135.395  
130.023  
128.898  
128.840  
128.216  
126.816  
124.328  
123.168  
120.427  
—109.803

77.361  
77.043  
76.725

—65.807  
—62.080

—29.699  
—26.788

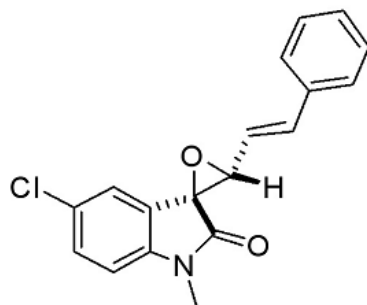

**trans-4ae**

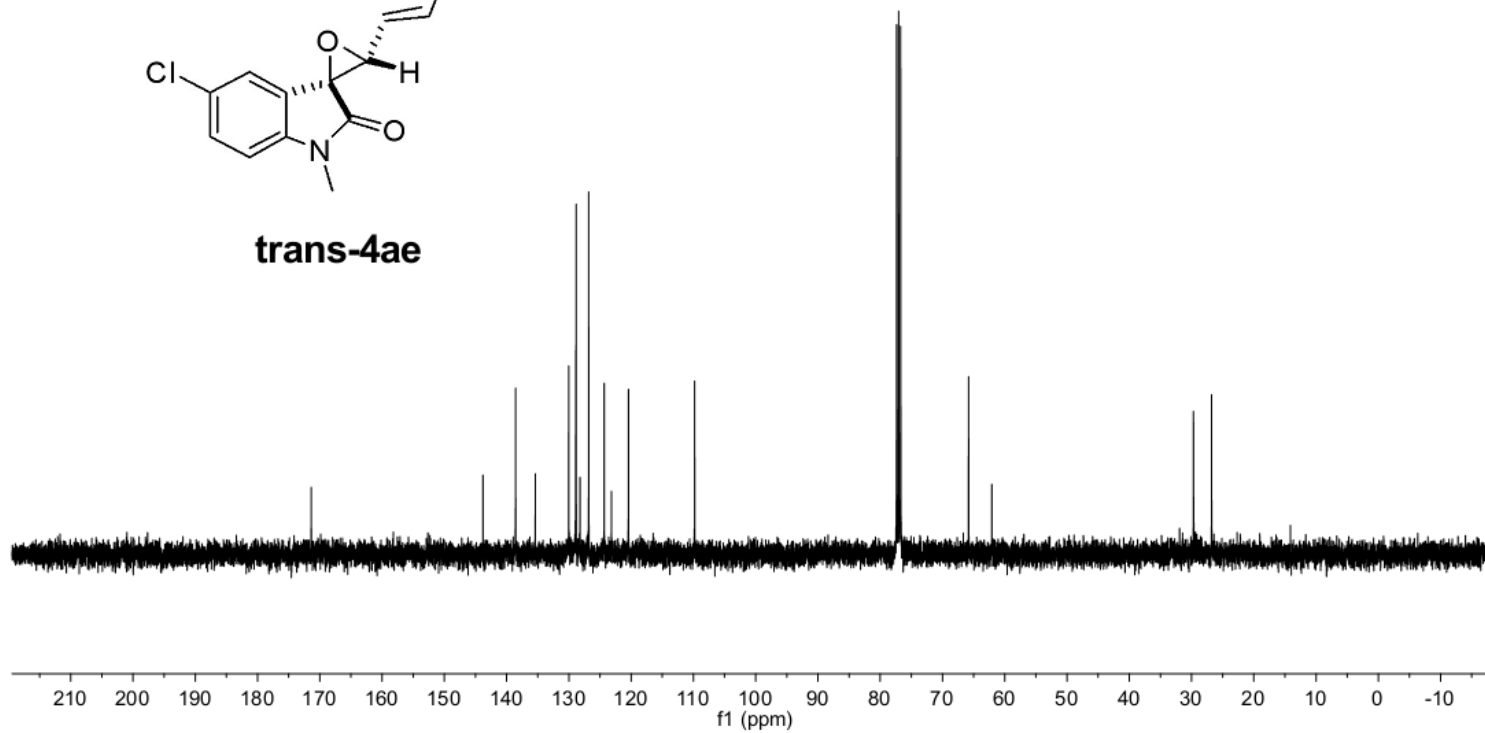

CMQ-3582  
boss HWH  
CMQ-3582

7.378  
7.360  
7.260  
7.242  
7.224  
7.208  
7.190  
7.175  
7.009  
6.987  
6.965  
6.856  
6.831  
6.814  
6.776  
6.753  
6.737  
6.716

4.097  
4.077

3.165

1.570  
1.259  
1.205  
1.179

0.801  
0.782

0.000  
-0.078

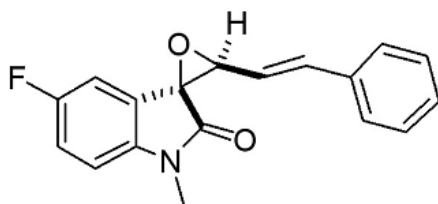

**cis-4af**

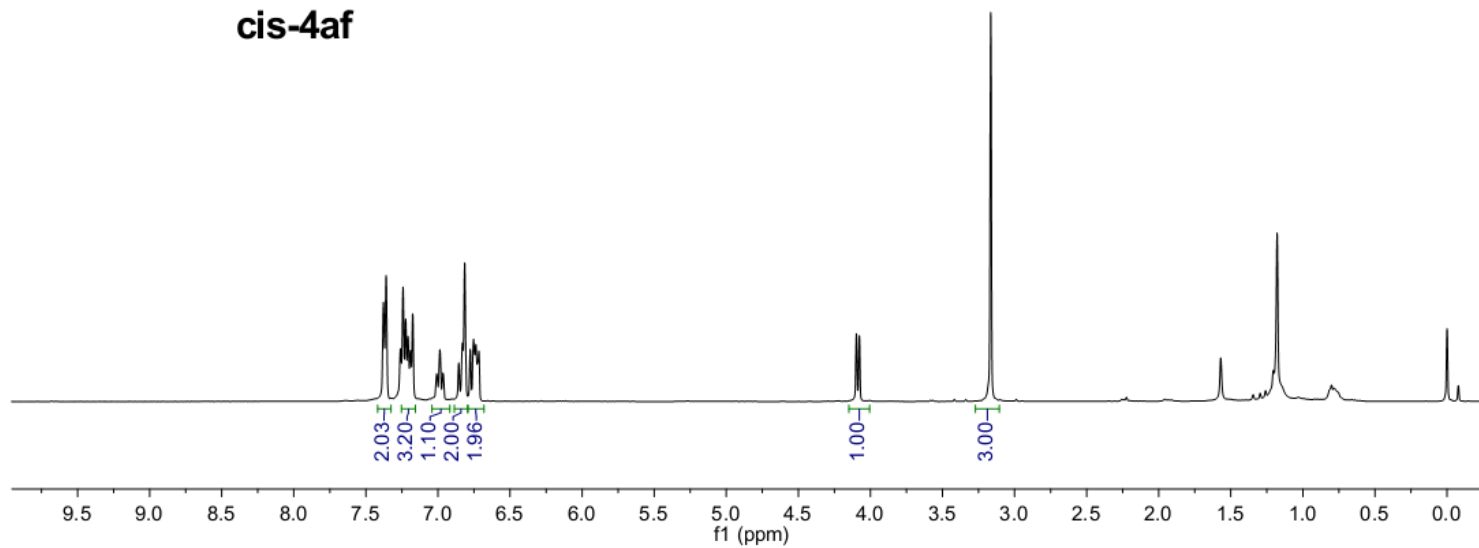

CMQ-3582  
boss HWH  
CMQ-3582

170.776  
160.483  
158.077  
140.346  
138.412  
135.659  
128.611  
126.914  
125.010  
124.927  
121.237  
116.466  
116.232  
109.930  
109.676  
109.349  
109.270  
77.316  
77.200  
76.998  
76.680  
67.311  
62.117  
29.654  
26.710  
15.807  
14.069  
0.979  
0.916

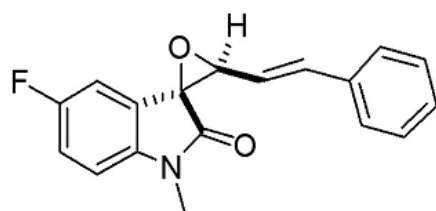

**cis-4af**

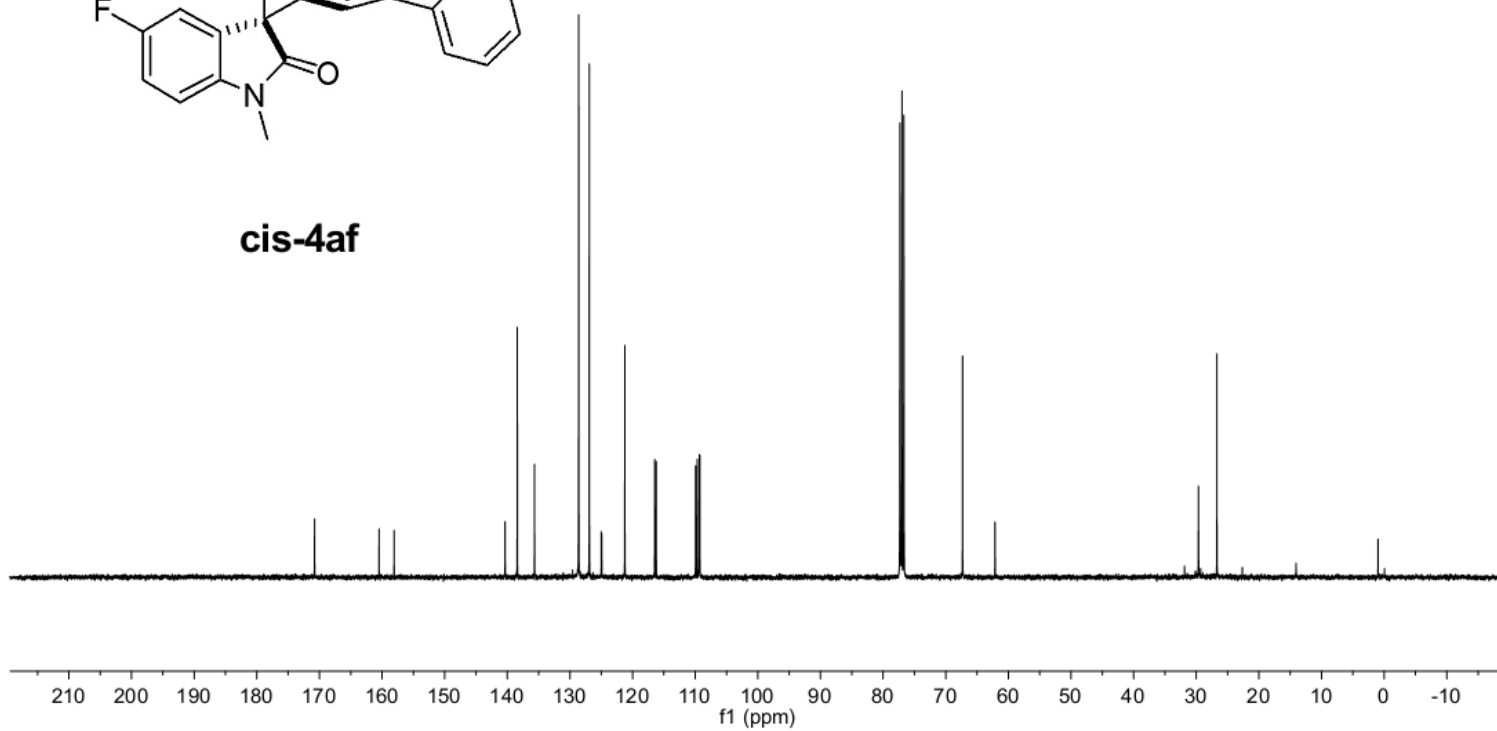



CMQ-3583  
boss HWH  
CMQ-3583

7.376  
7.358  
7.340  
7.323  
7.306  
7.257  
7.106  
7.084  
7.062  
7.015  
6.995  
6.976  
6.857  
6.847  
6.836  
6.826  
6.252  
6.234  
6.212  
6.194

4.319  
4.301

3.270

0.077

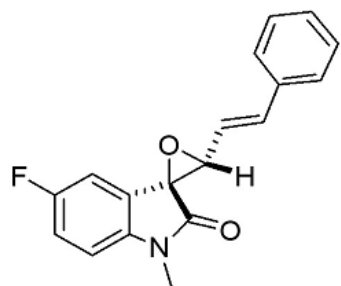

**trans-4af**

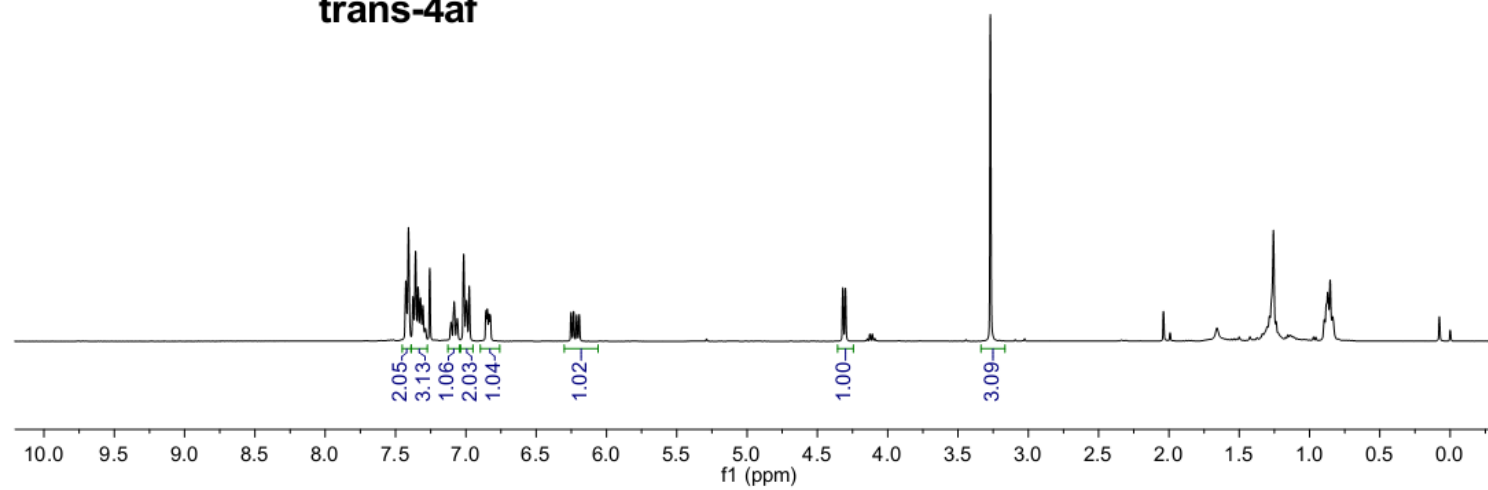

CMQ-3583  
boss HWH  
CMQ-3583

— 171.681  
— 160.330  
— 157.928  
— 141.387  
— 141.368  
— 138.461  
— 135.536  
— 129.036  
— 128.984  
— 126.938  
— 123.256  
— 123.172  
— 120.586  
— 116.676  
— 116.441  
— 112.432  
— 112.174  
— 109.641  
— 109.560  
— 77.510  
— 77.395  
— 77.192  
— 76.874  
— 65.789  
— 62.427  
— 31.609  
— 29.851  
— 26.765  
— 22.842  
— 14.264  
— 11.446

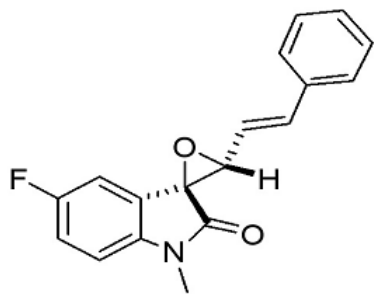

**trans-4af**

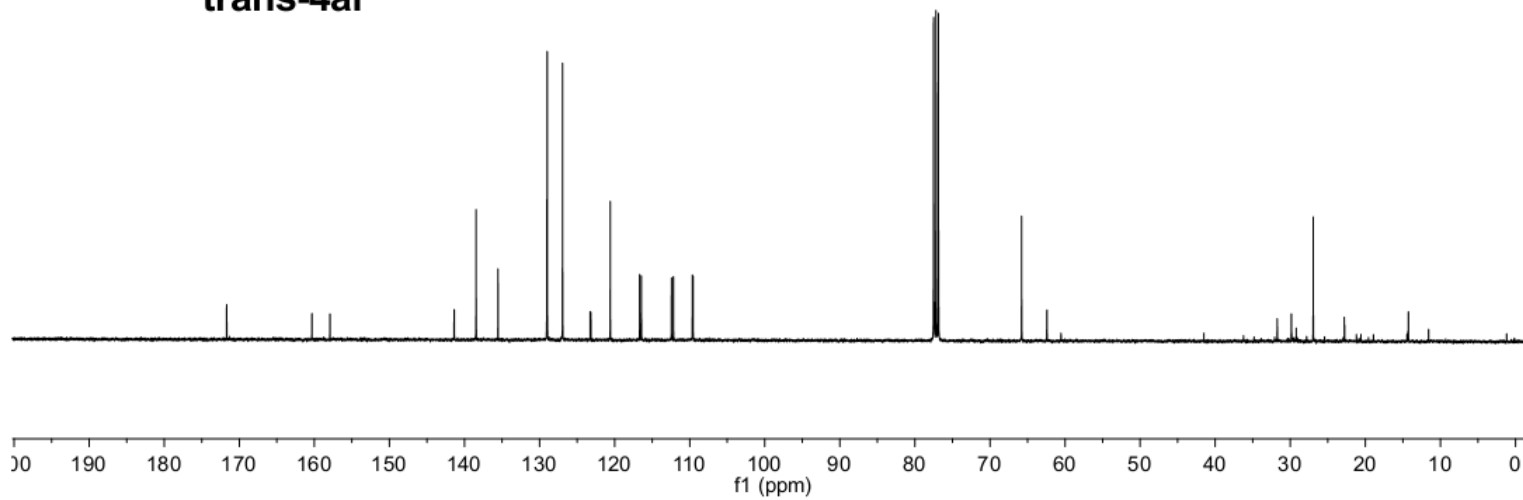

CMQ-4102  
boss HWH  
CMQ-4102

8.343  
8.322  
8.040  
7.456  
7.438  
7.353  
7.335  
7.316  
7.290  
7.262  
6.995  
6.975  
6.938  
6.795  
6.774  
6.755  
6.733

4.333  
4.312

3.334

1.646

1.256

0.078  
0.000

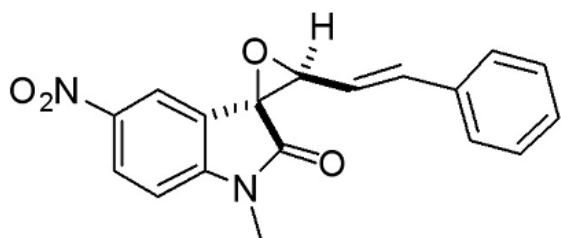

**cis-4ag**

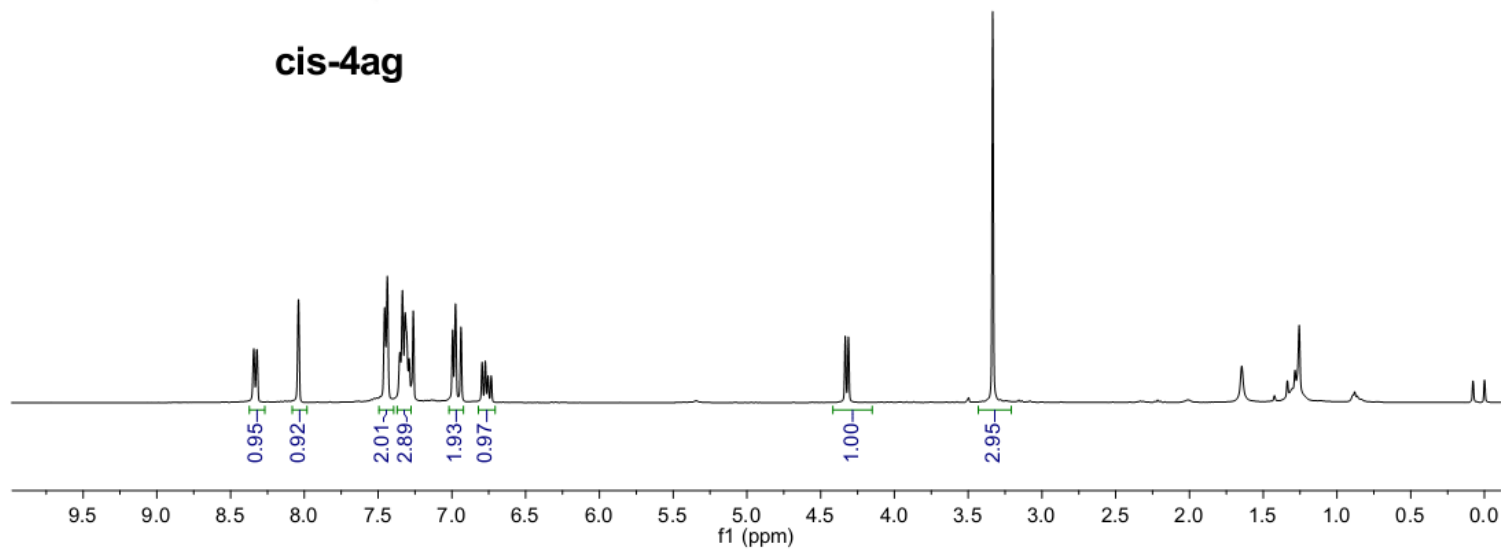

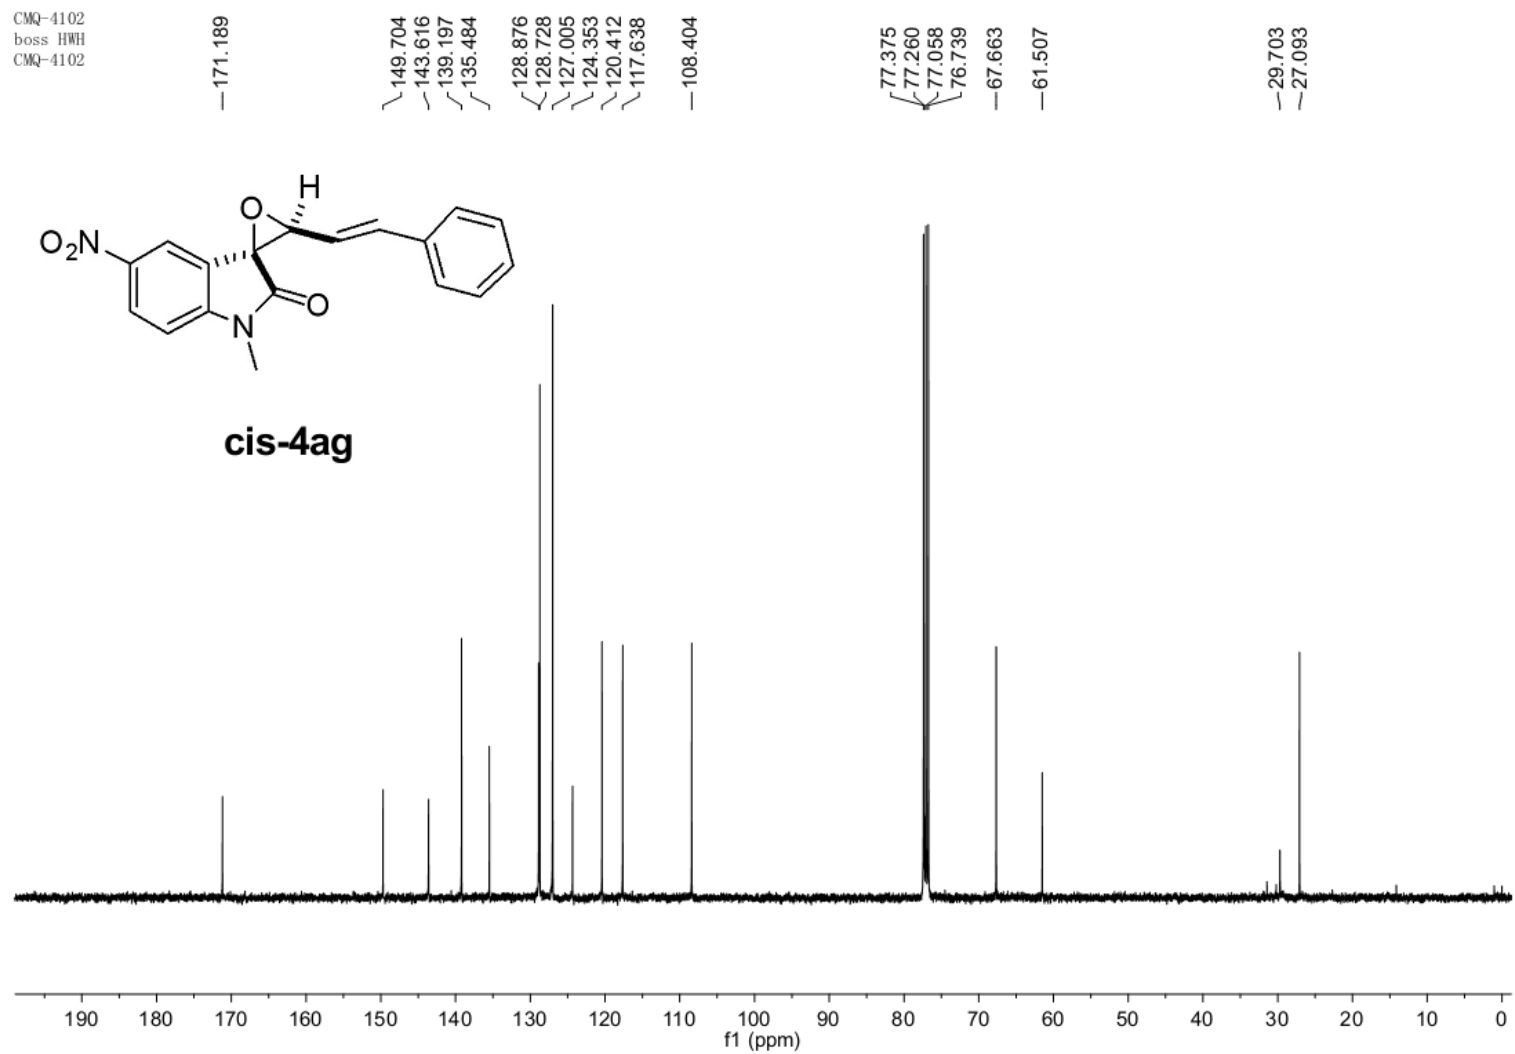

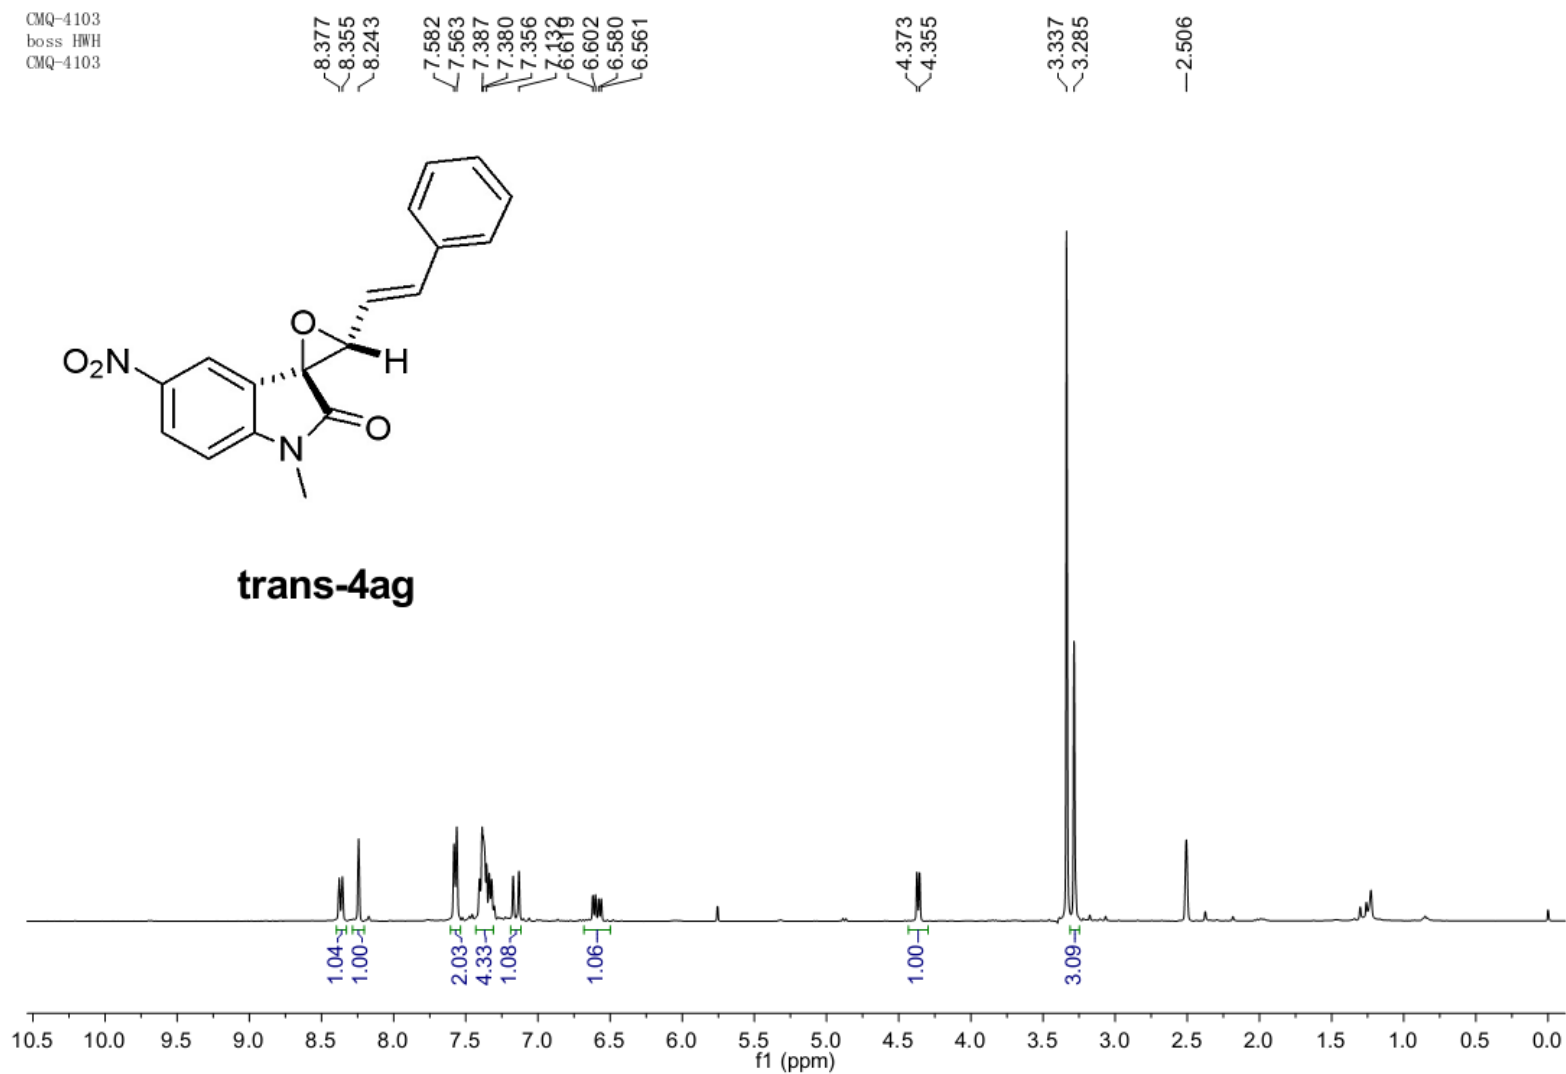

CMQ-4103  
boss HWH  
CMQ-4103

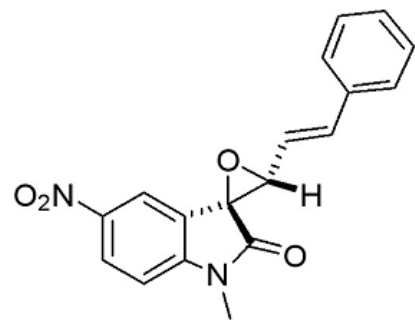

**trans-4ag**

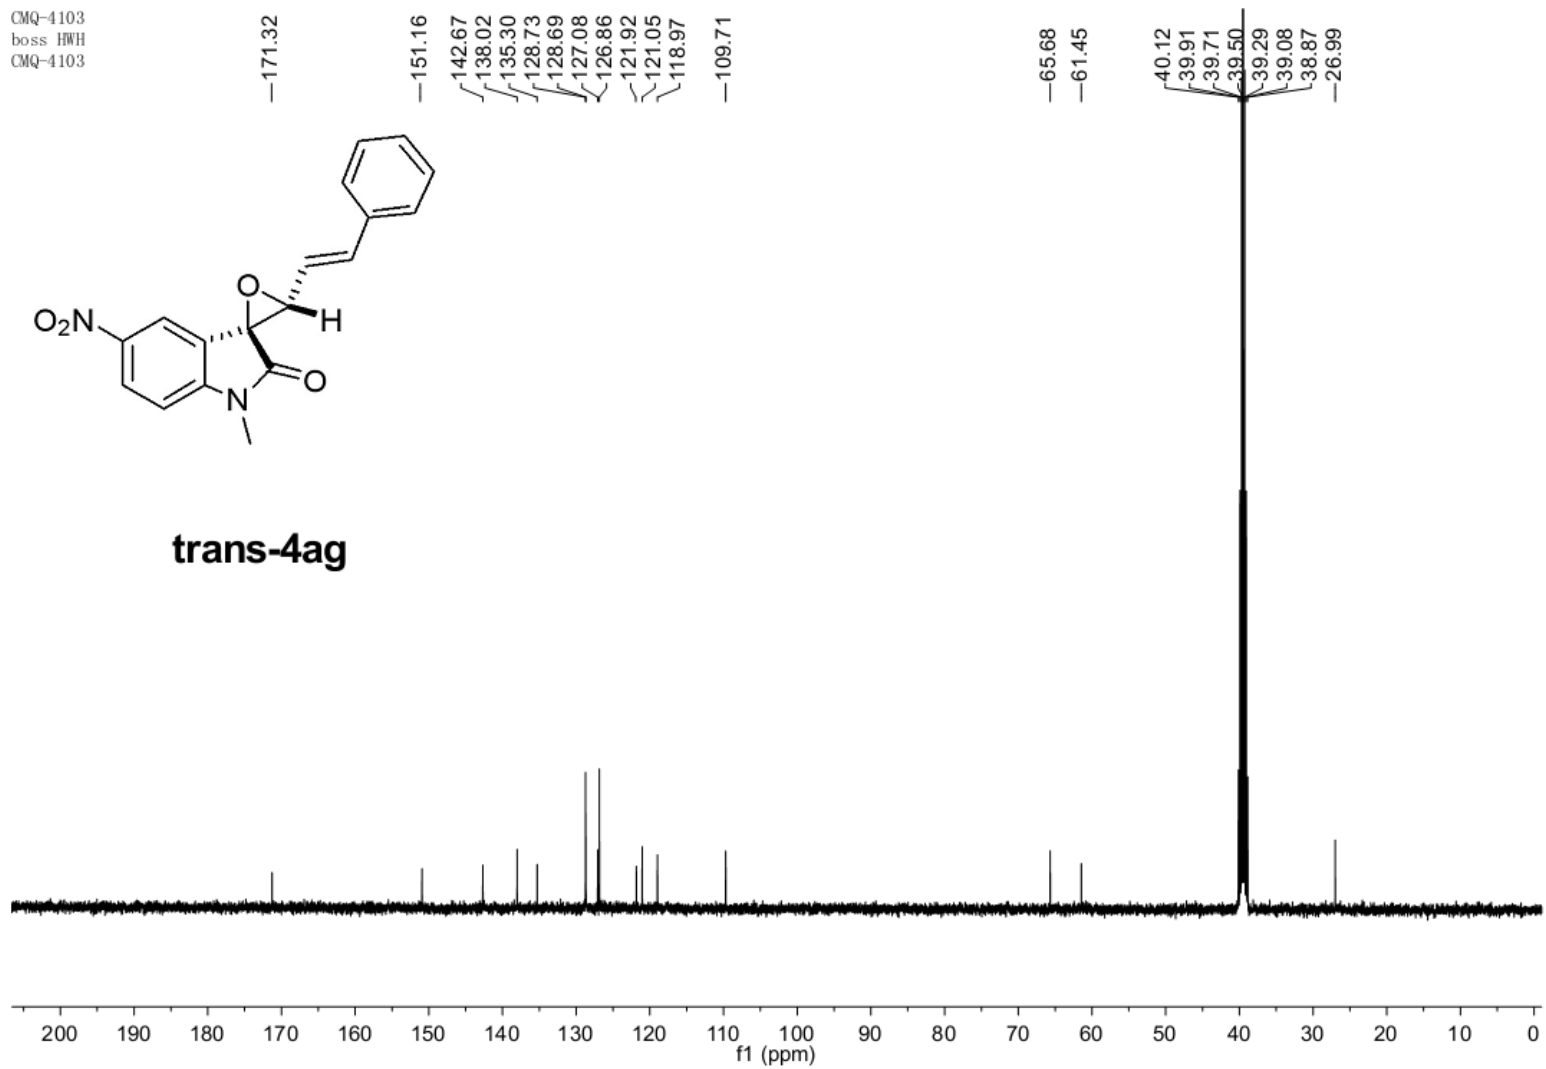

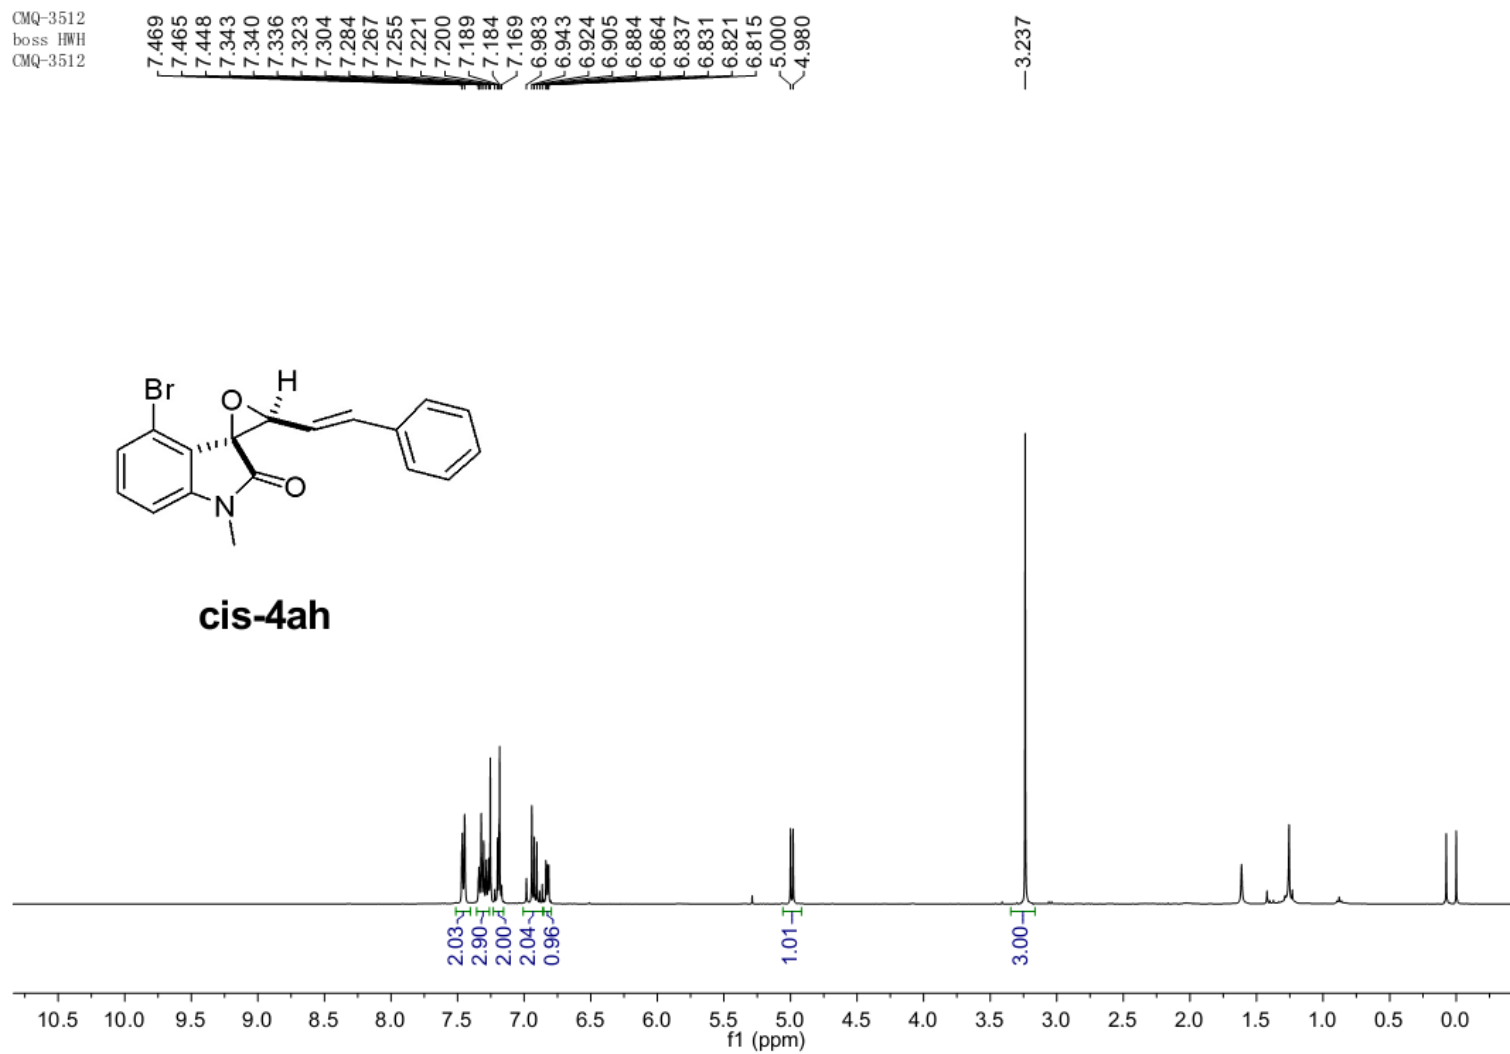

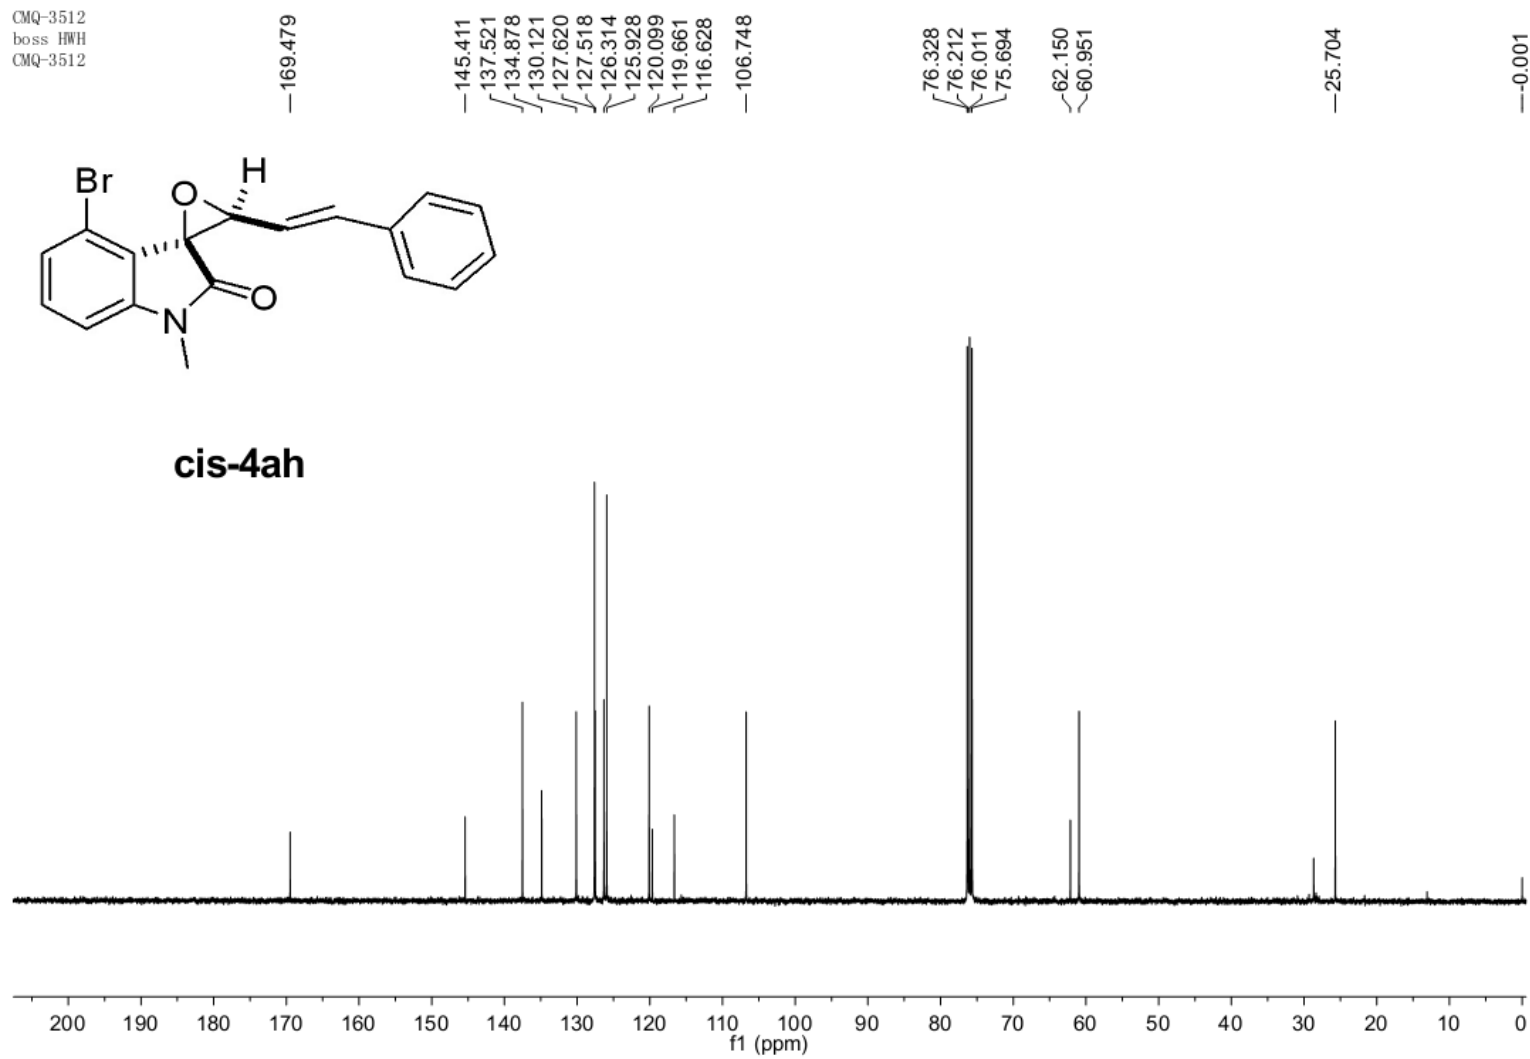



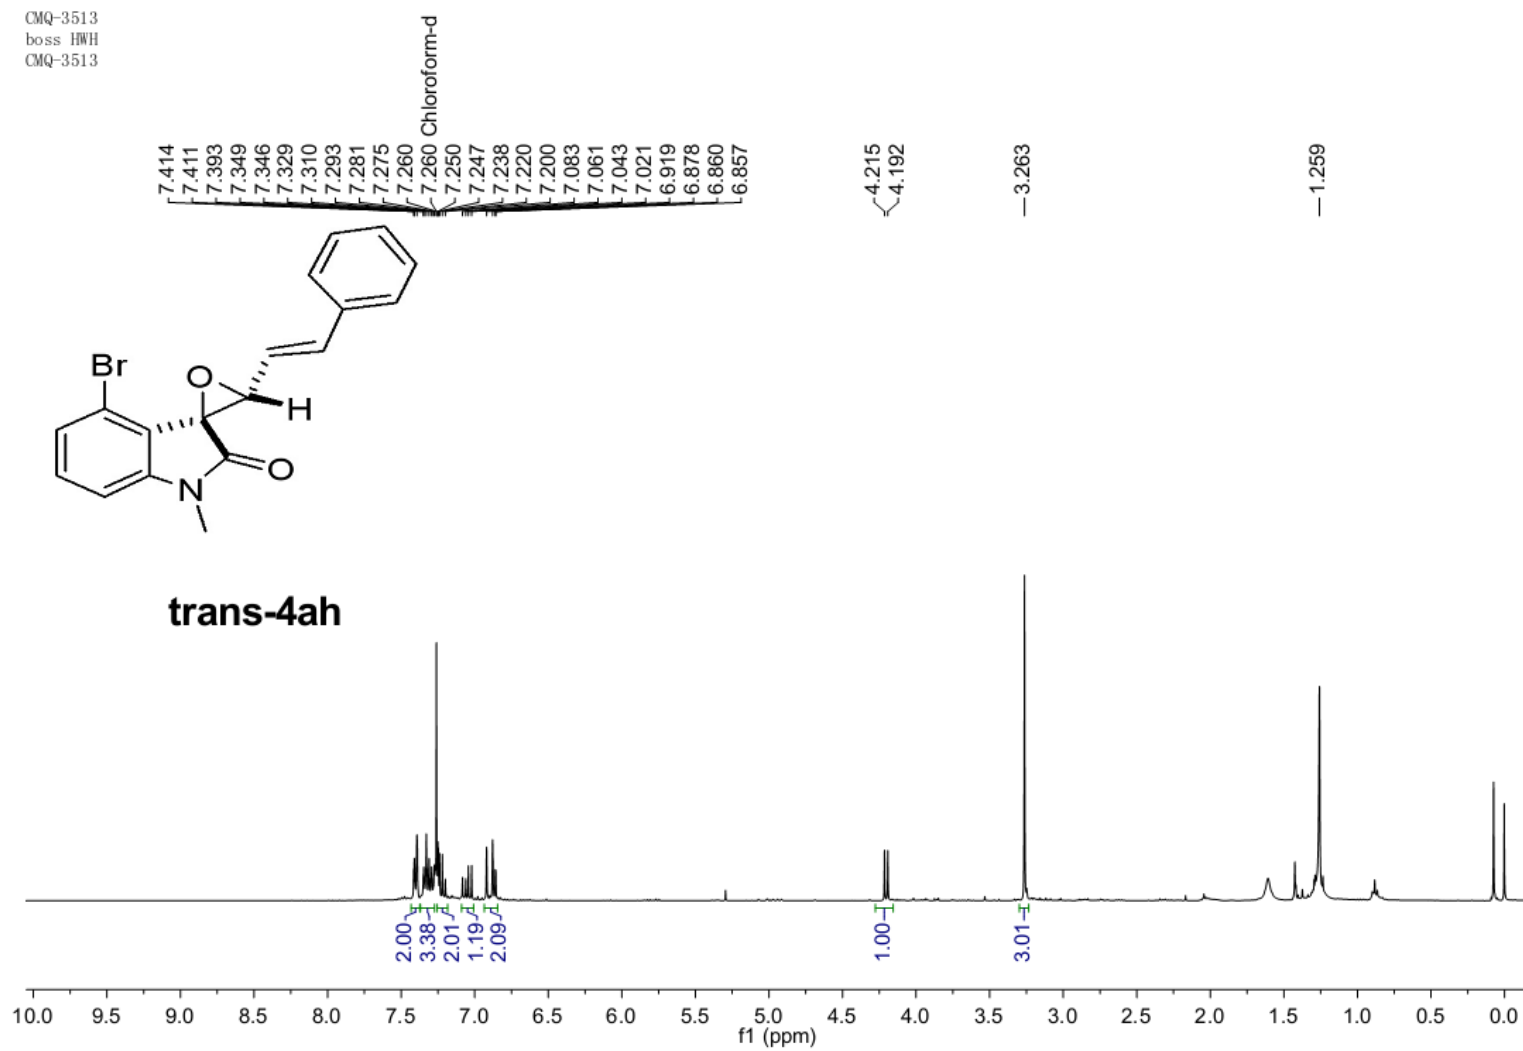

CMQ-3513  
boss HWH  
CMQ-3513

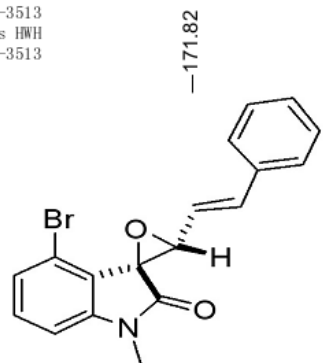

**trans-4ah**

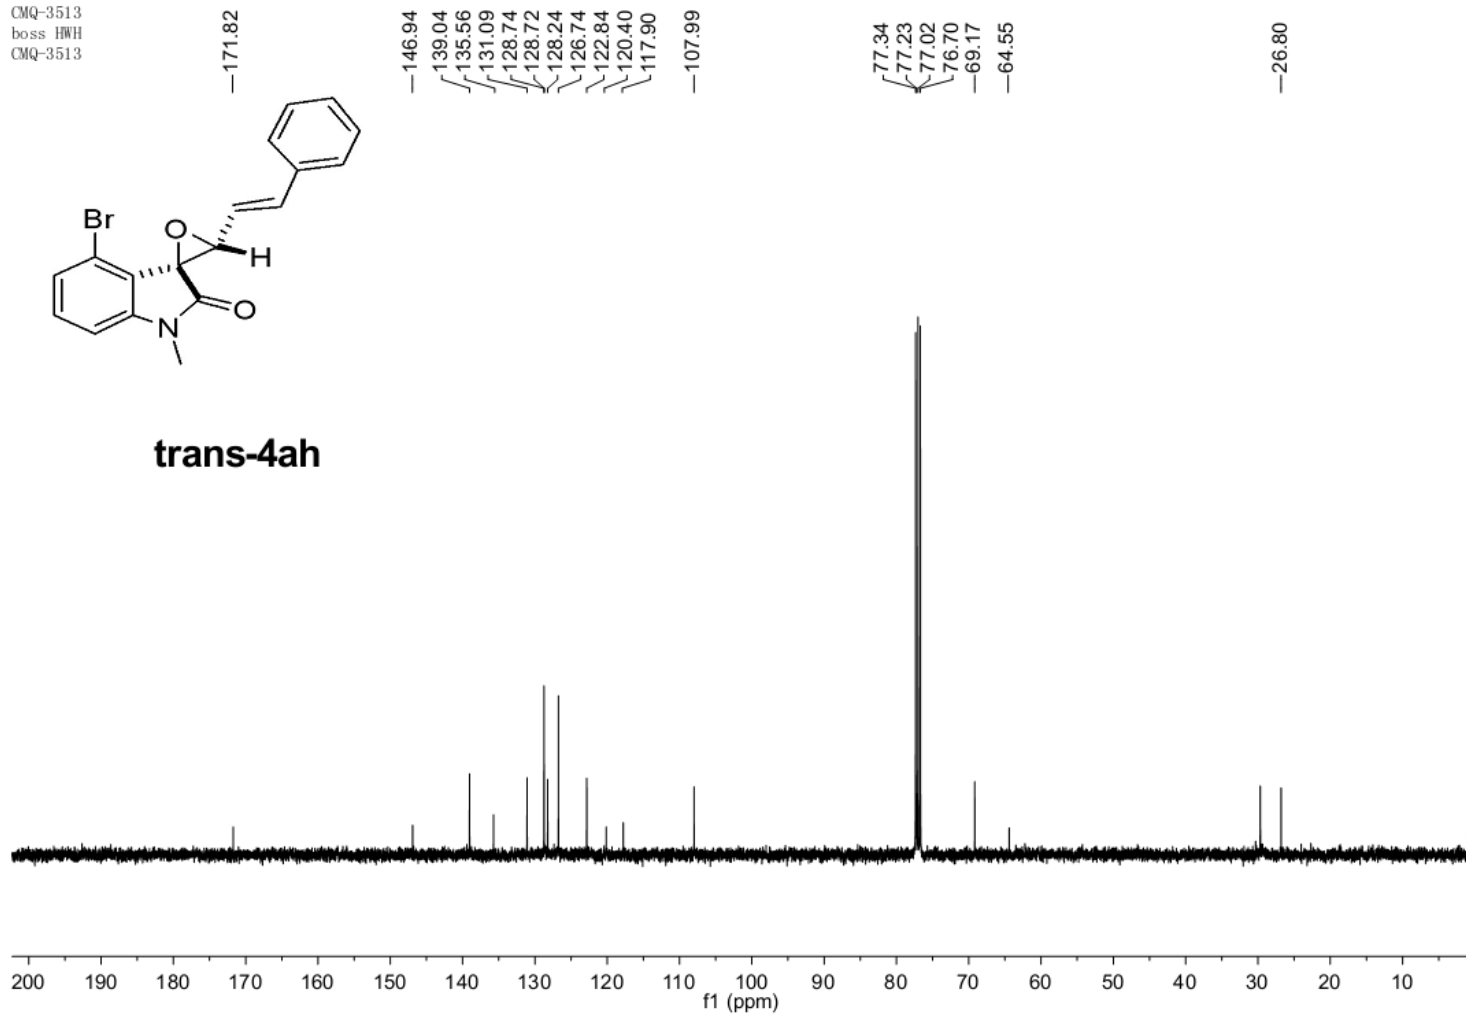

CMQ-3462  
boss HWH  
CMQ-3462

7.386  
7.368  
7.273  
7.256  
7.237  
7.220  
7.203  
7.185  
6.996  
6.862  
6.829  
6.823  
6.771  
6.750  
6.730  
6.709

4.122  
4.101

3.174

1.524  
1.210

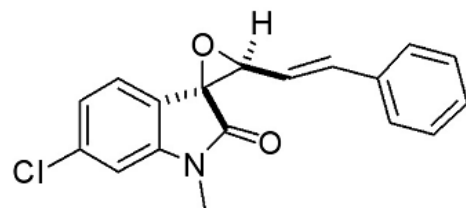

**cis-4ai**

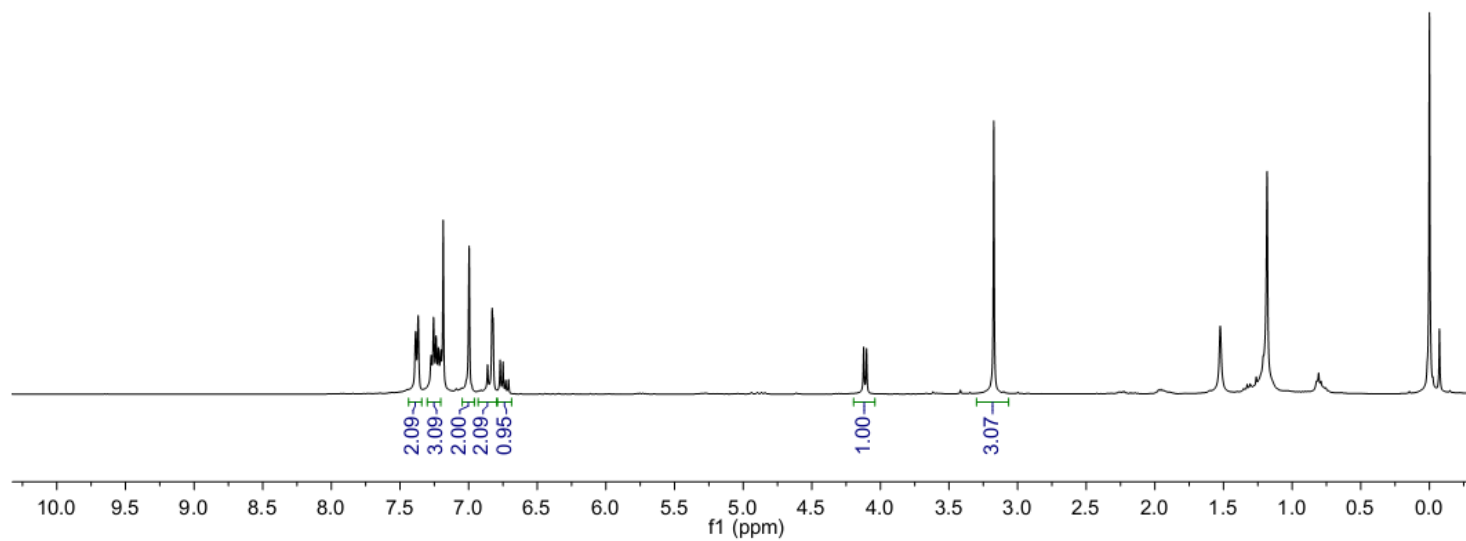

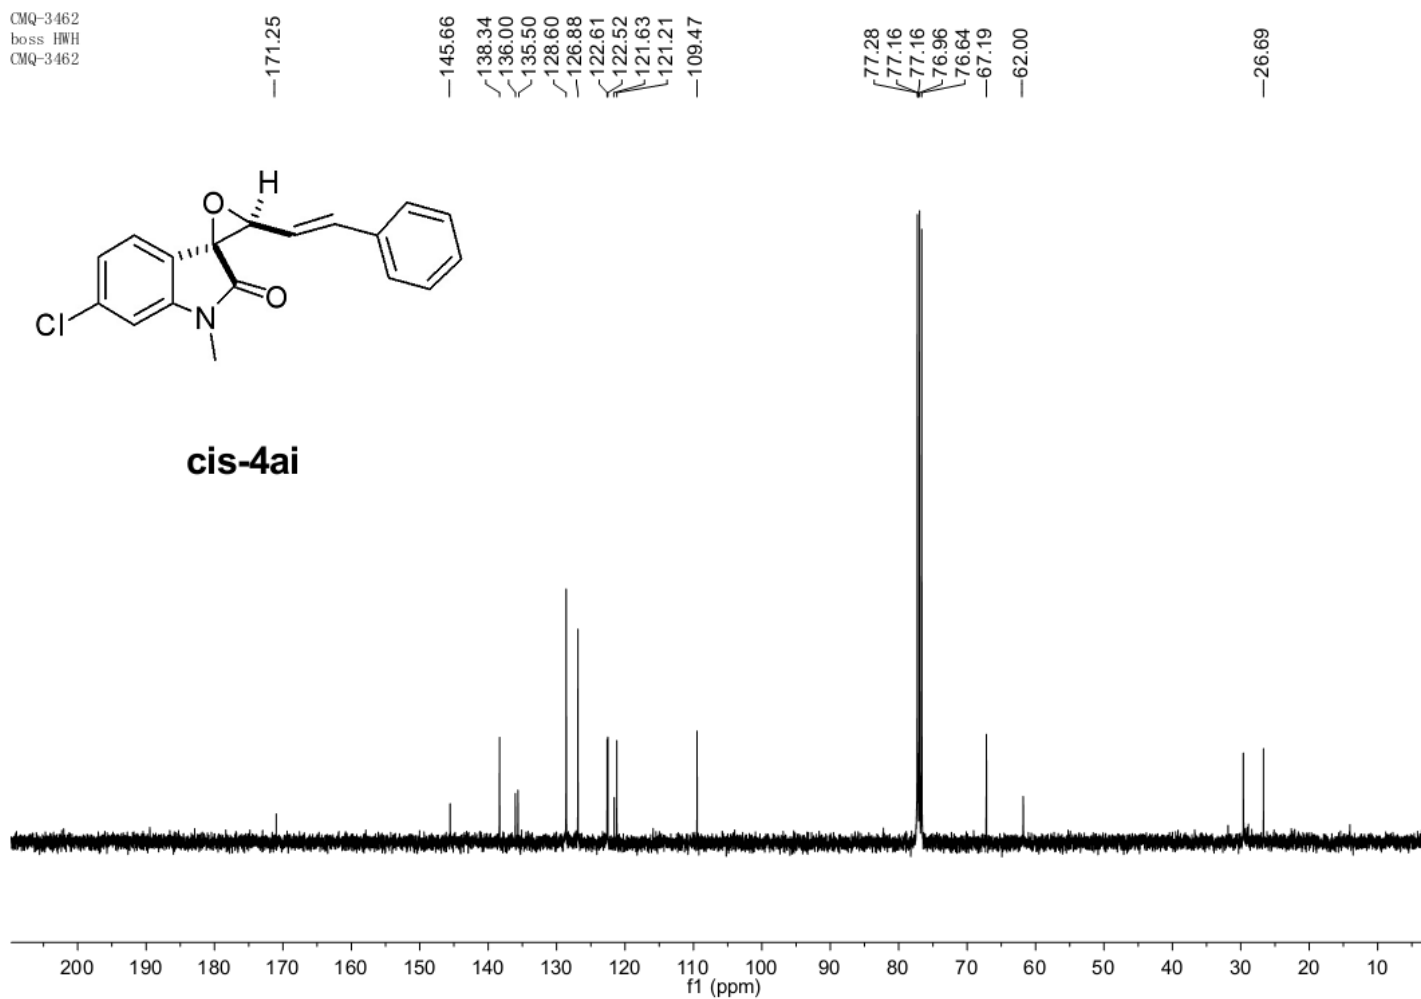

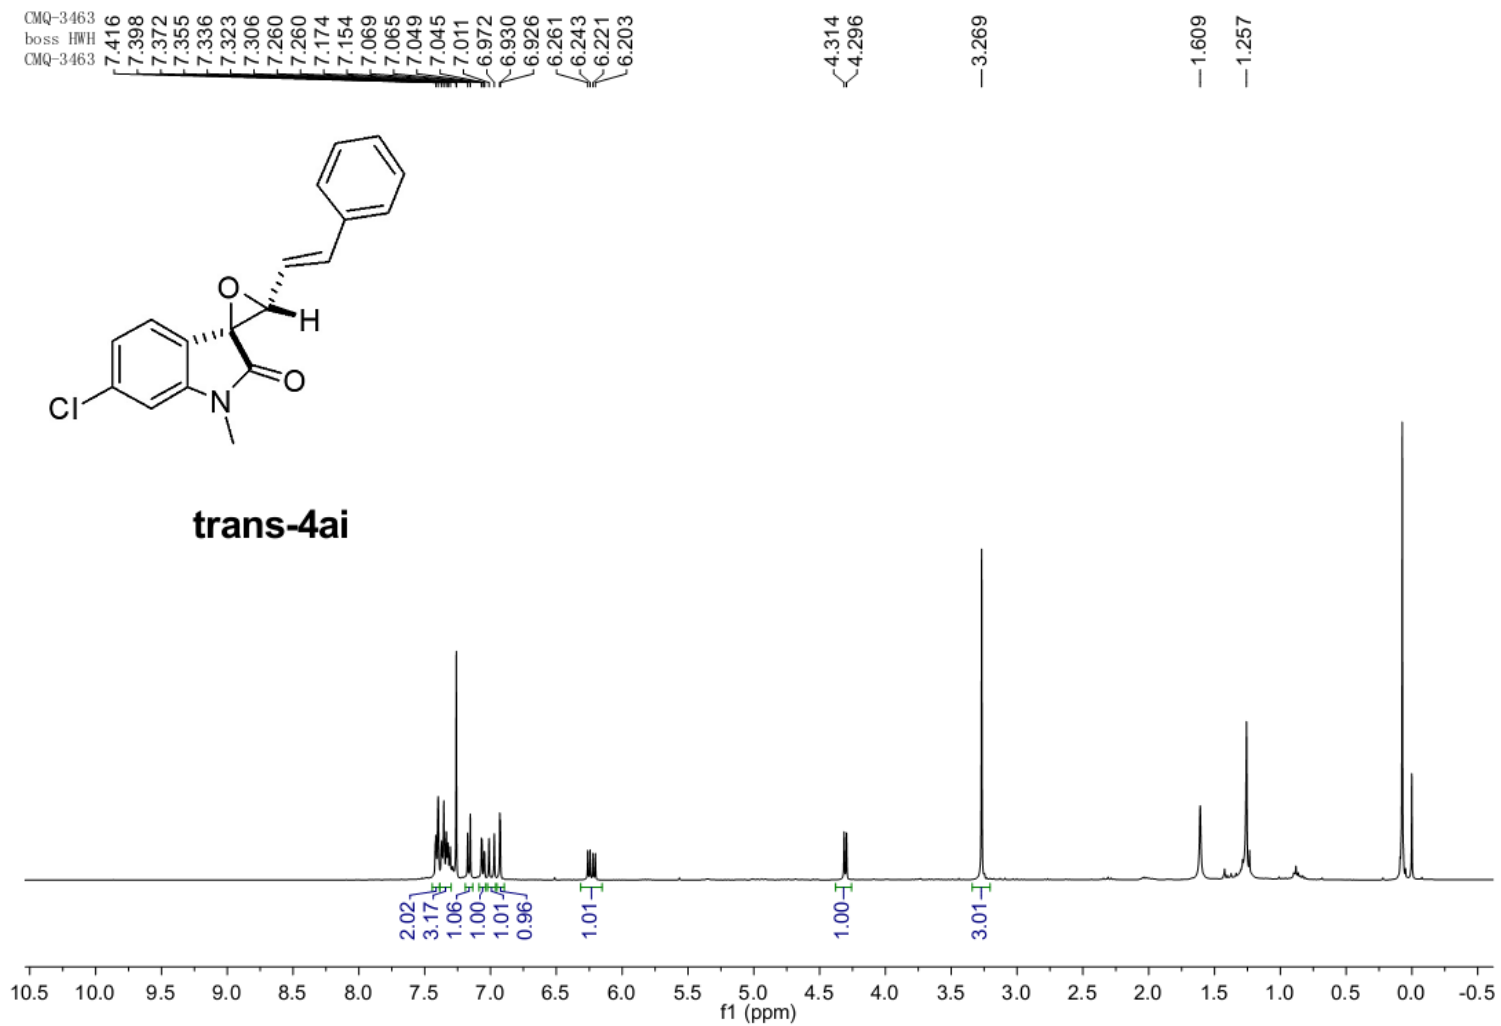

CMQ-3463  
boss\_HWH  
CMQ-3463

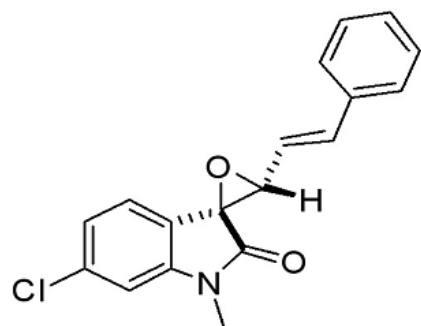

**trans-4ai**

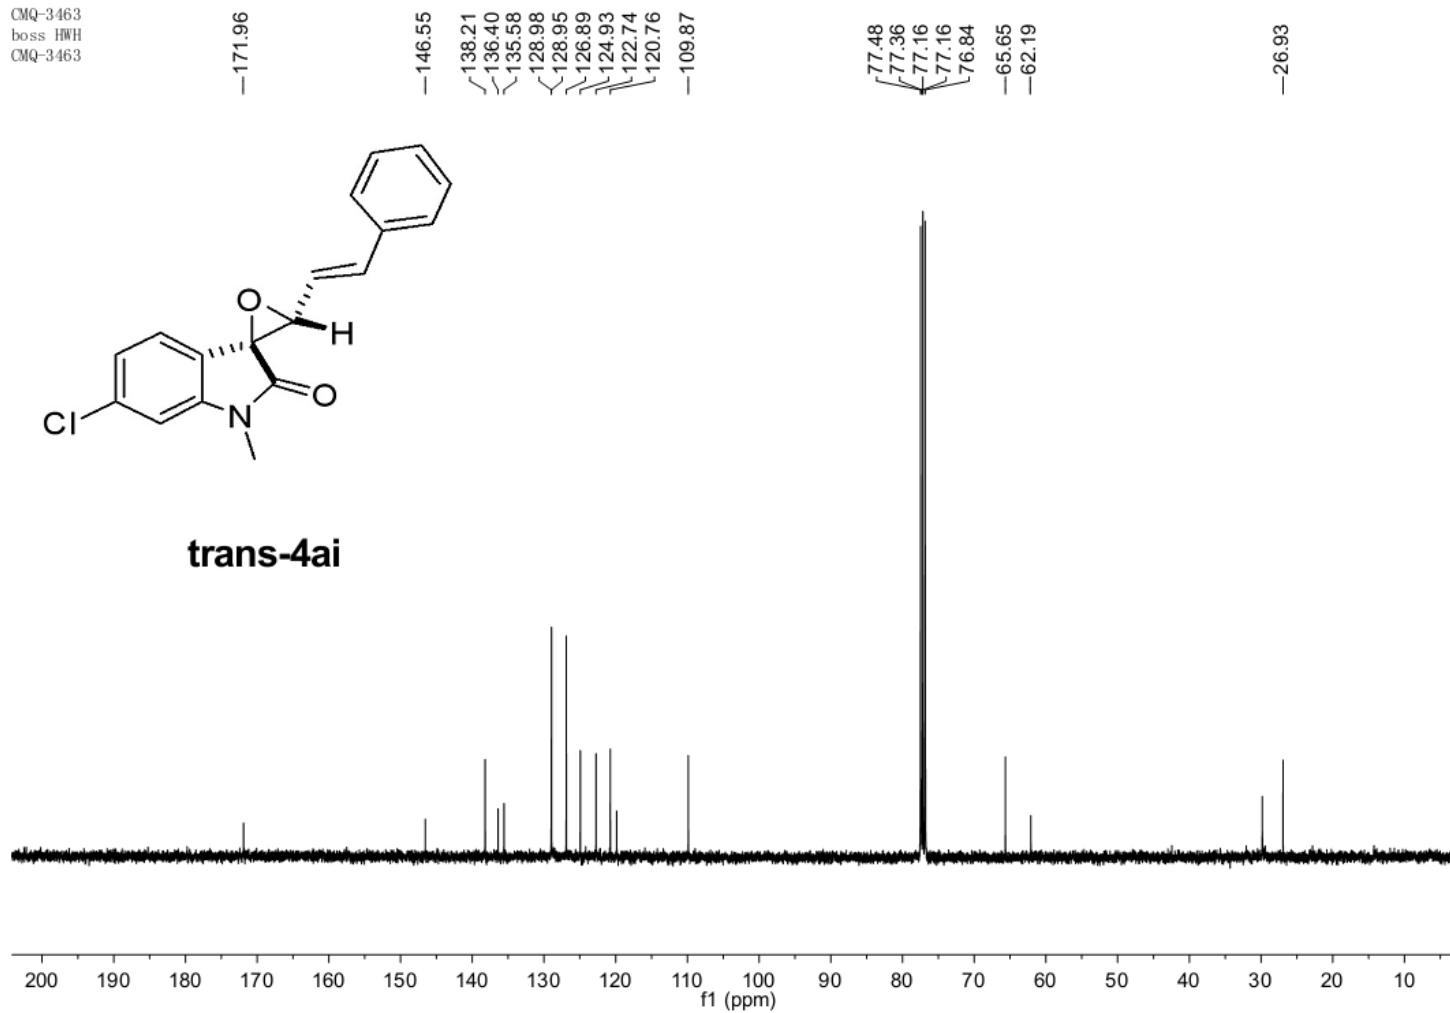

cmg-3402  
boss HWH  
cmg-3402

7.390  
7.374  
7.259  
7.242  
7.189  
7.028  
7.018  
6.865  
6.824  
6.783  
6.762  
6.724  
6.705  
6.589  
6.567

4.123  
4.102

3.178

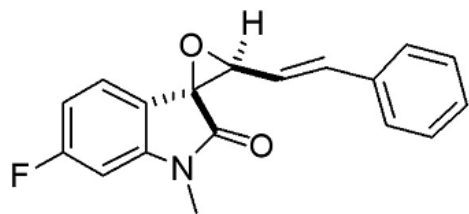

**cis-4aj**

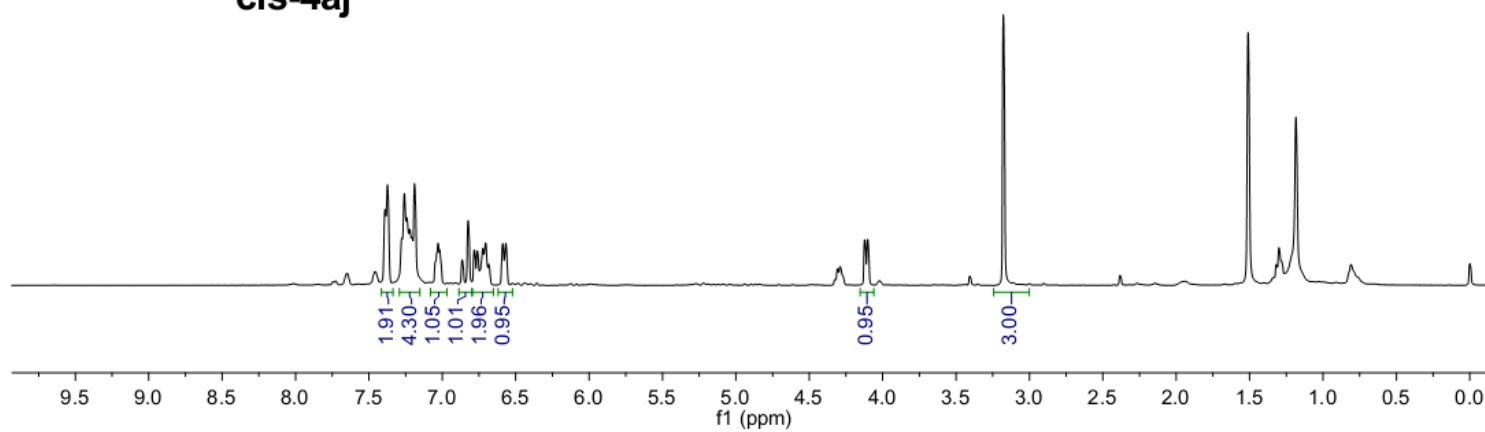

cmg-3402  
boss HWH  
cmg-3402

— 171.427  
— 146.117  
— 138.283  
— 135.747  
— 128.662  
— 128.612  
— 126.938  
— 123.049  
— 122.948  
— 119.493  
— 108.909  
— 97.936  
— 97.660  
77.335  
77.049  
76.700  
— 67.125  
— 61.876  
— 29.701  
— 26.833  
— 14.110

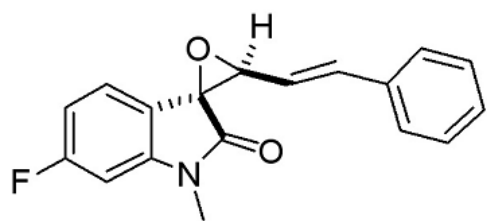

**cis-4aj**

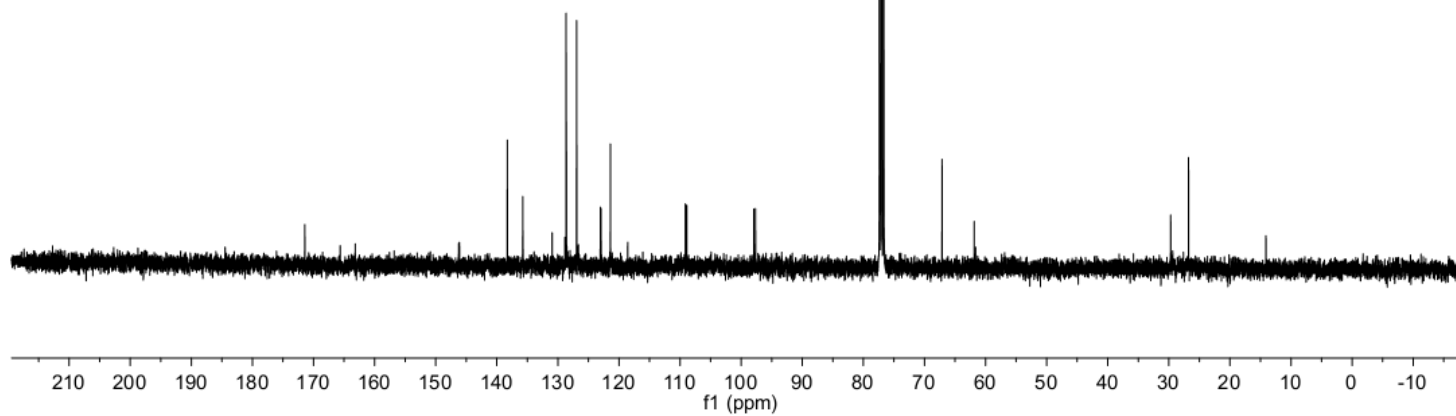



cmg-3403  
boss HWH  
cmg-3403

7.346  
7.330  
7.298  
7.282  
7.266  
7.254  
7.235  
7.187  
7.143  
7.133  
7.125  
7.113  
6.940  
6.900  
6.684  
6.609  
6.588  
6.204  
6.187  
6.165  
6.147

4.234  
4.217

3.193

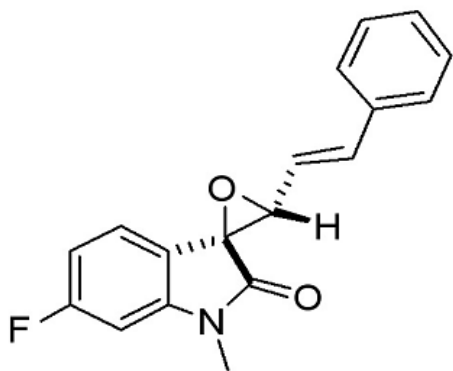

**trans-4aj**

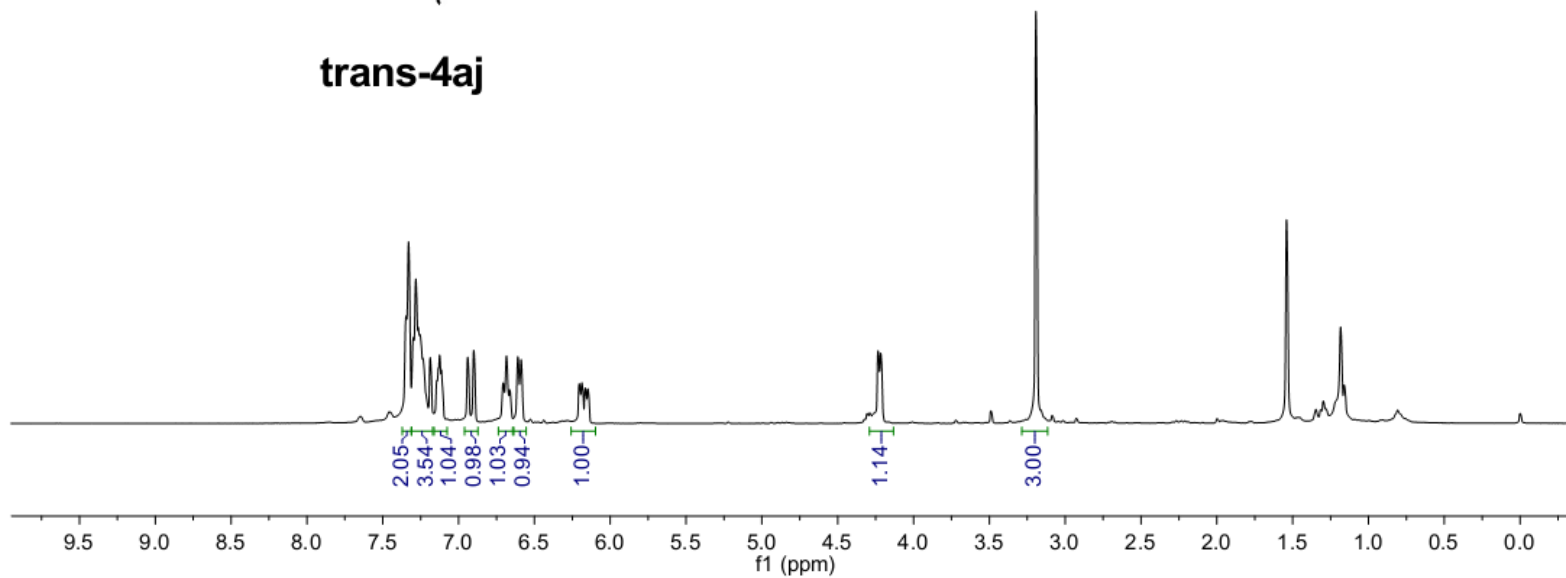

cmg-3403  
boss HWH  
cmg-3403

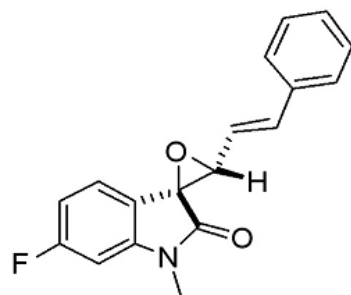

**trans-4aj**

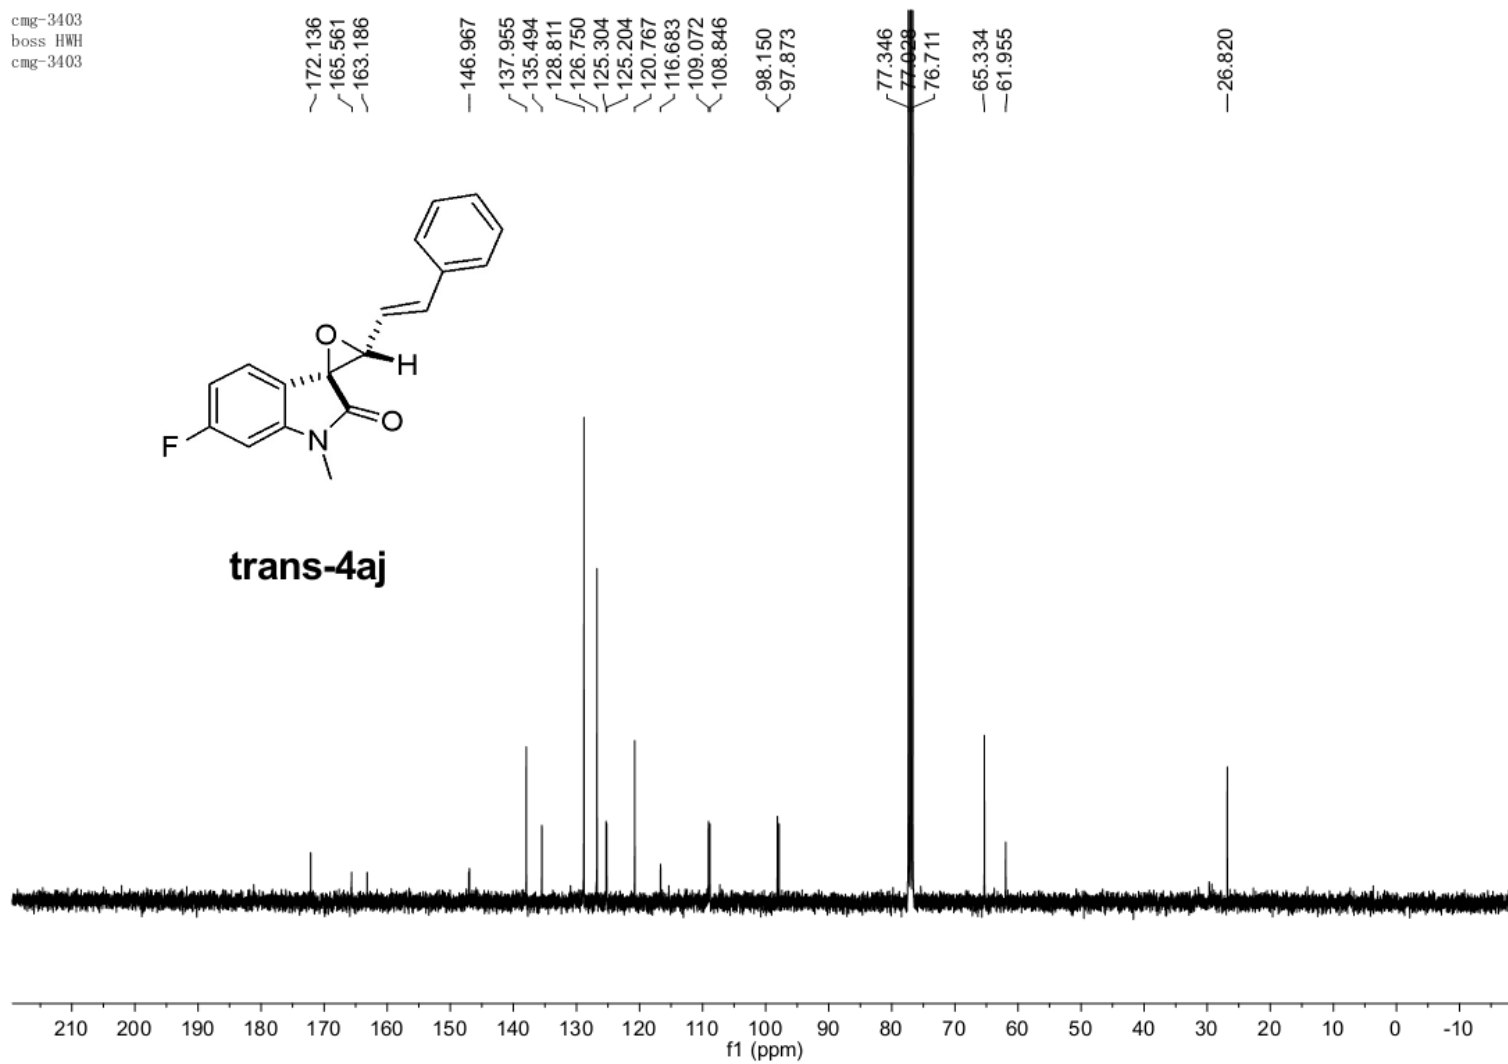

CMQ-3502  
boss HWH  
CMQ-3502

7.458  
7.440  
7.346  
7.329  
7.310  
7.301  
7.296  
7.283  
7.278  
7.257  
7.035  
7.021  
7.018  
7.000  
6.982  
6.929  
6.889  
6.834  
6.813  
6.793  
6.772

4.164  
4.143  
—3.631

—1.583  
—1.285

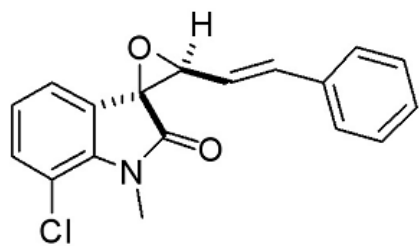

**cis-4ak**

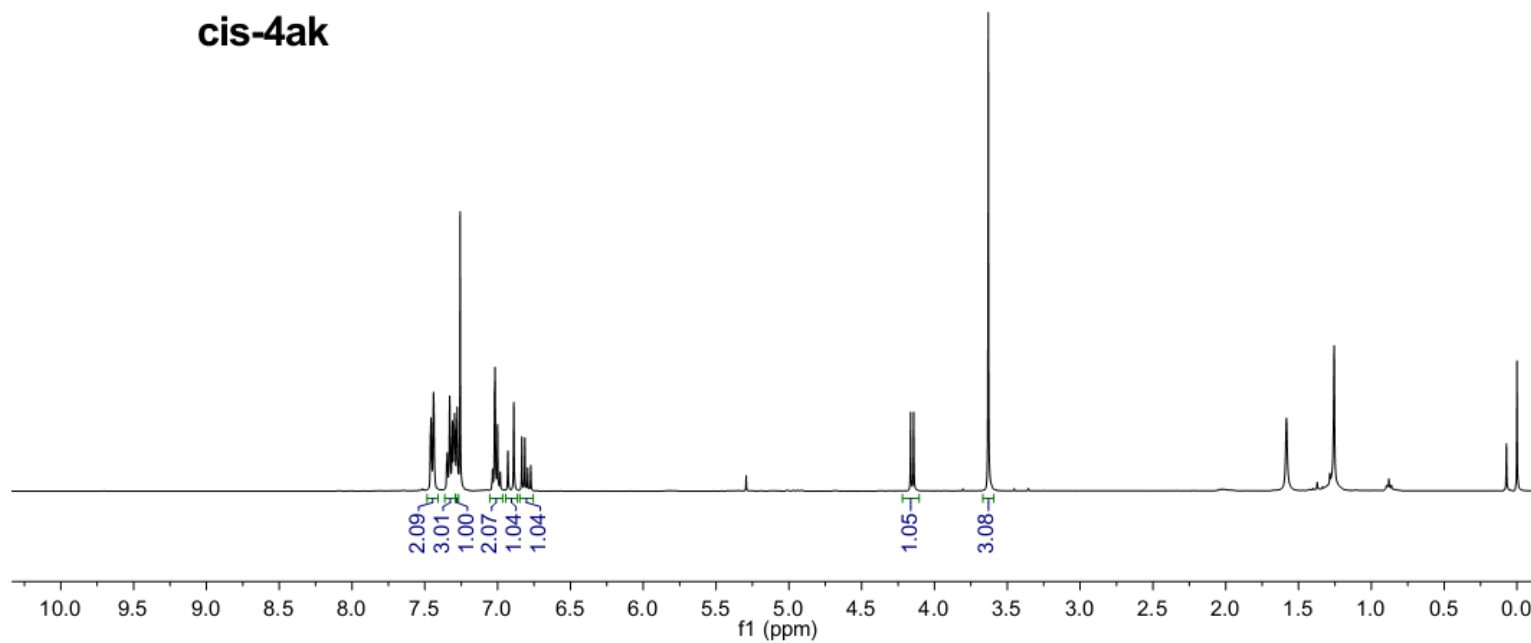

CMQ-3502  
boss HWH  
CMQ-3502

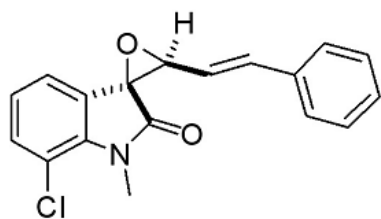

**cis-4ak**

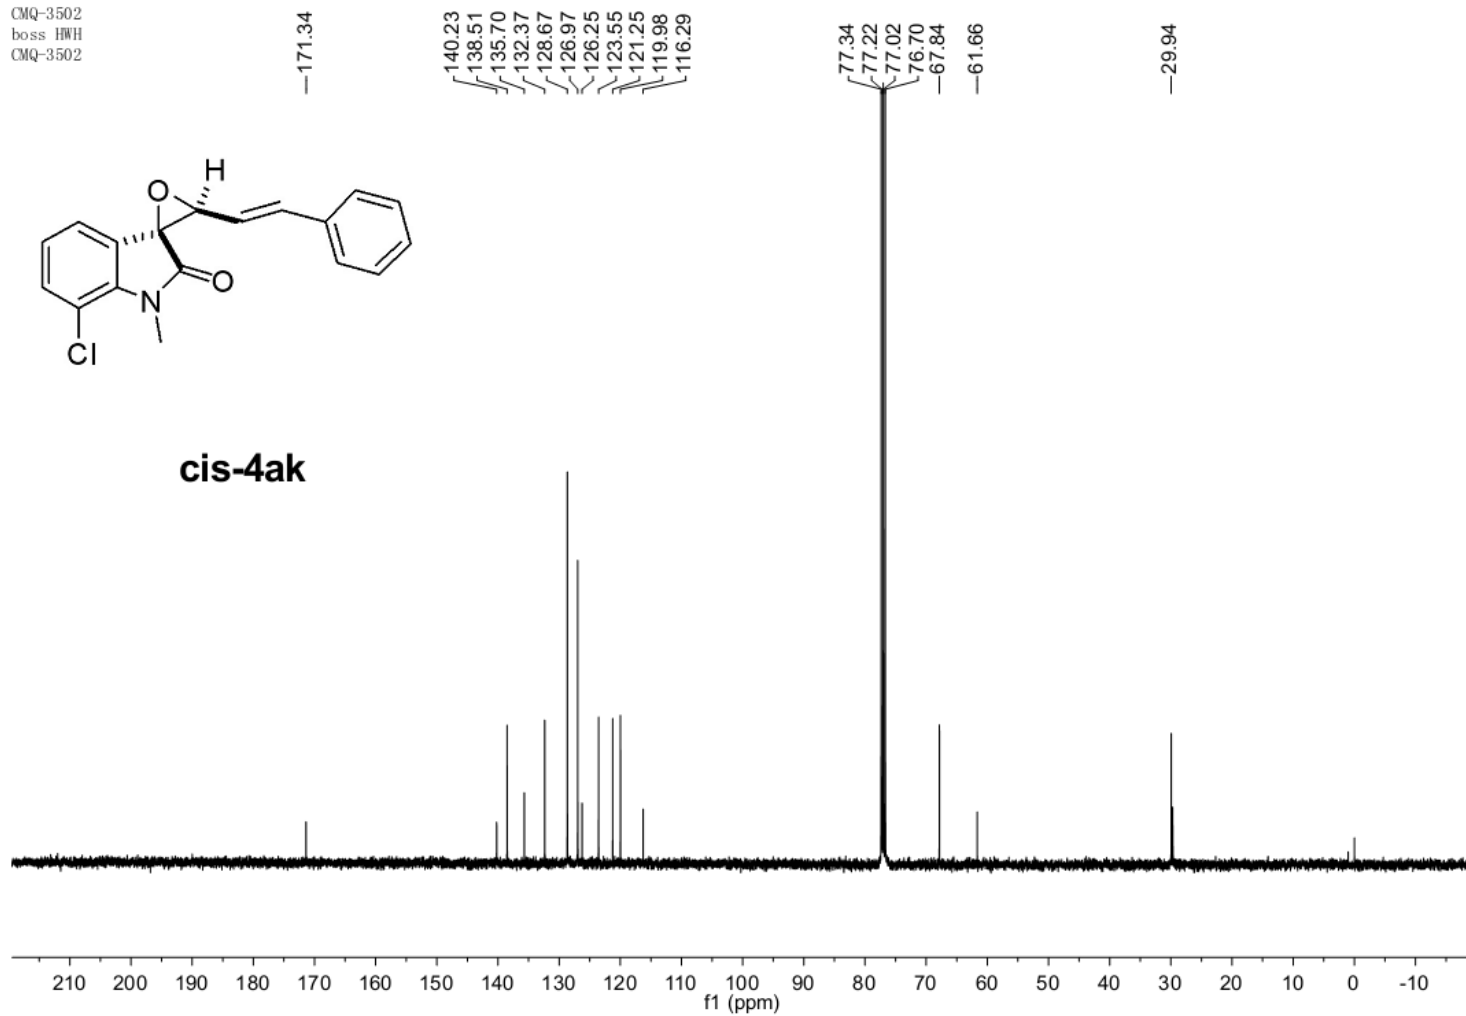

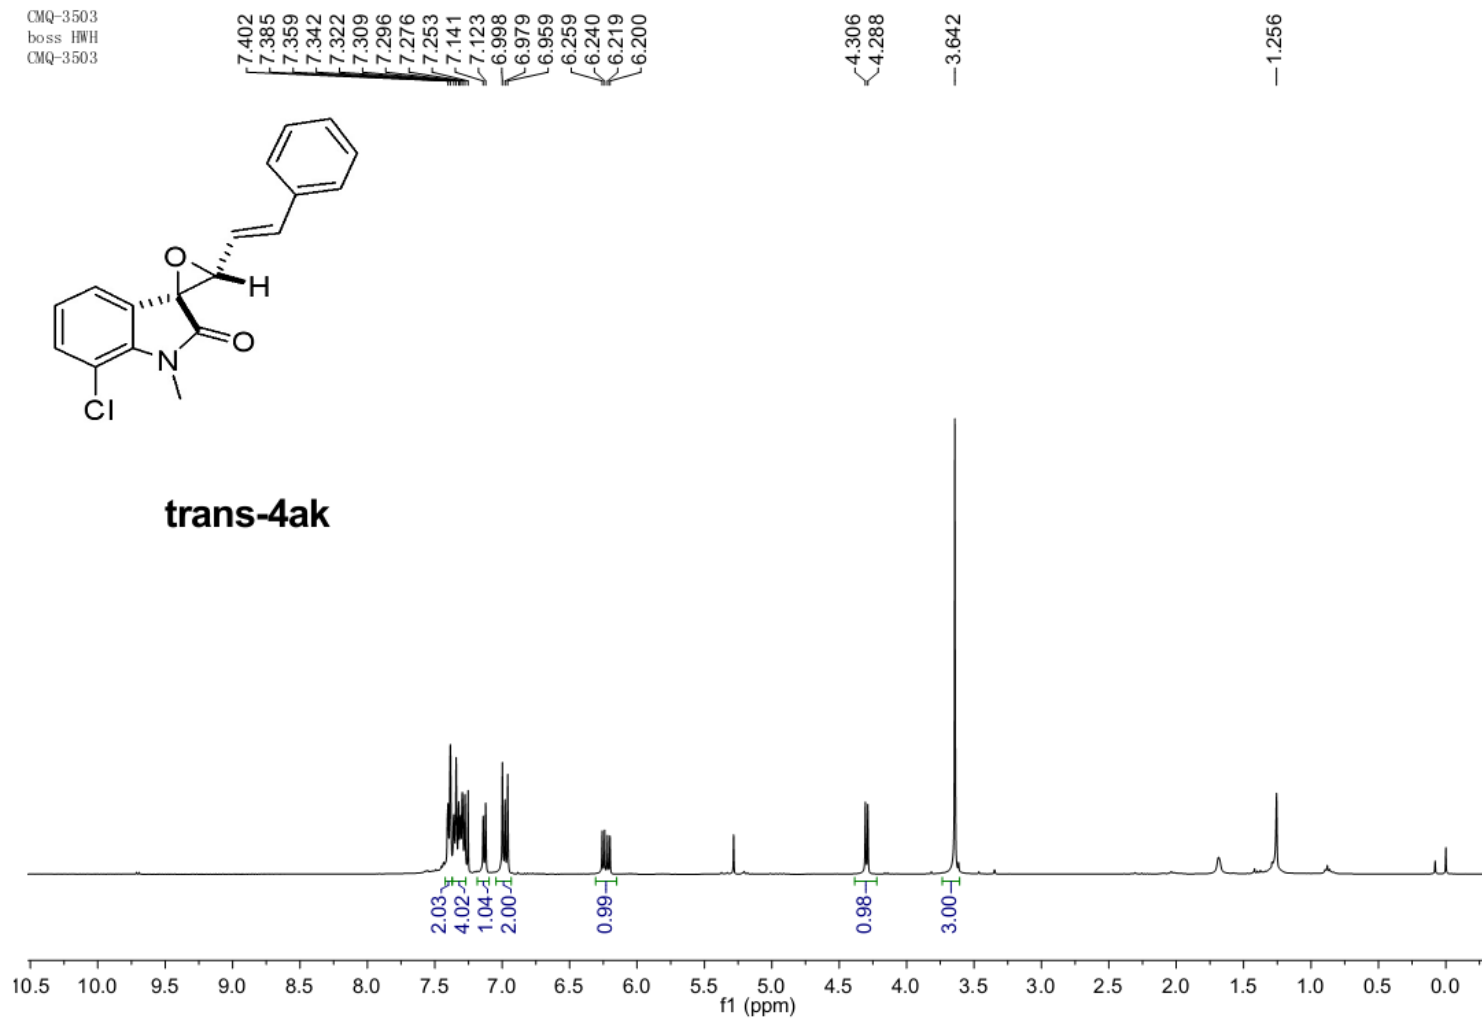

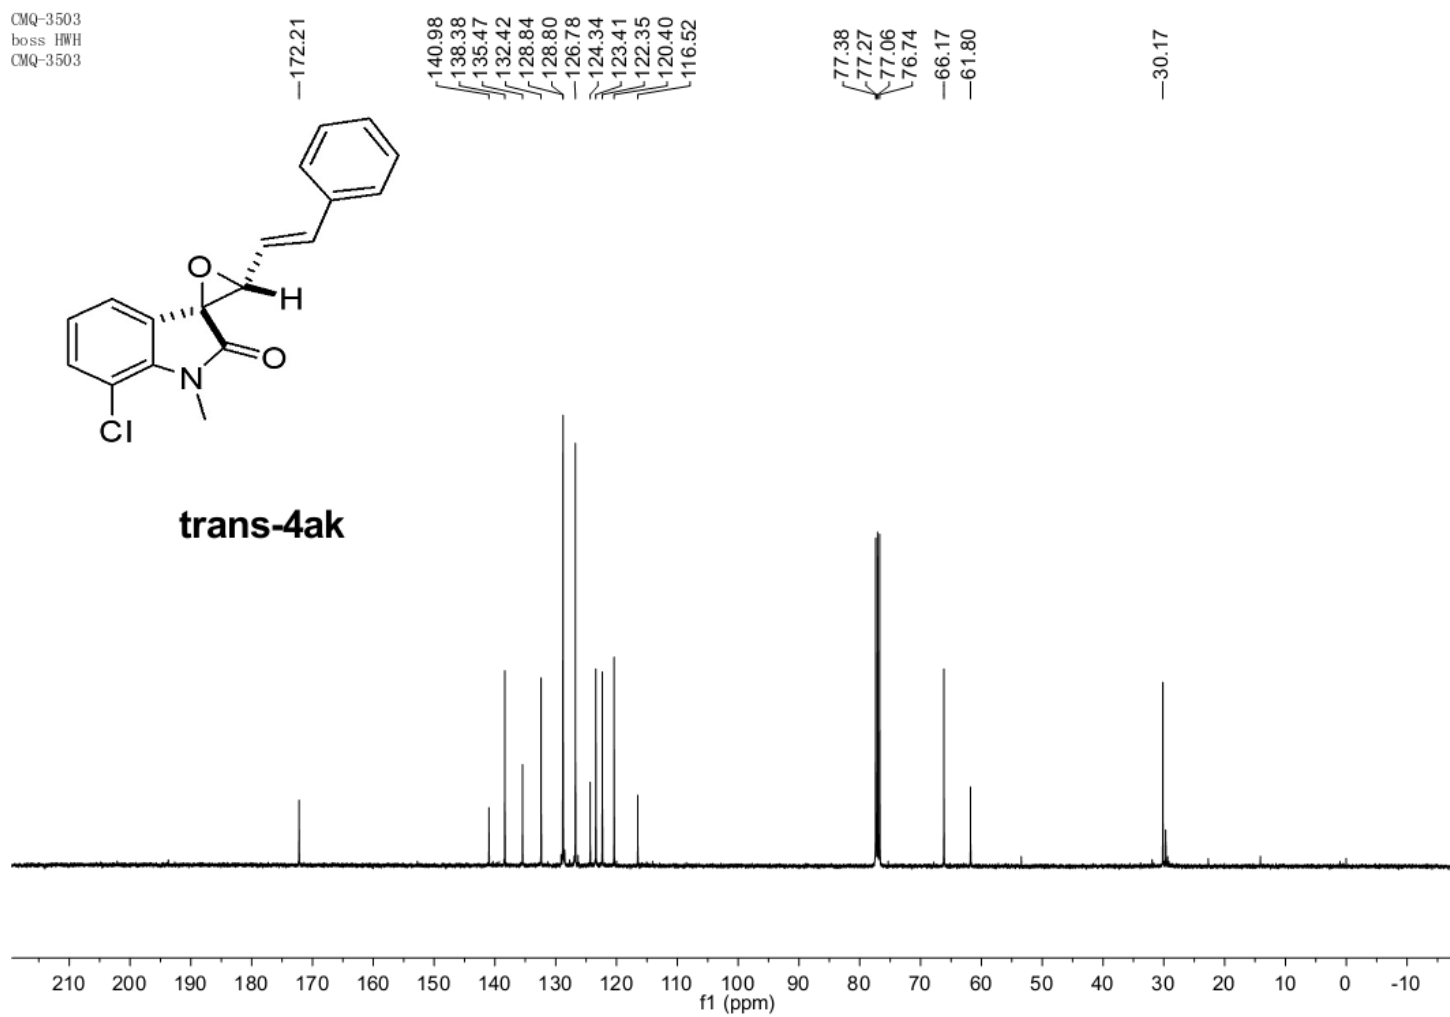

CMQ-4145  
boss boss a HWH

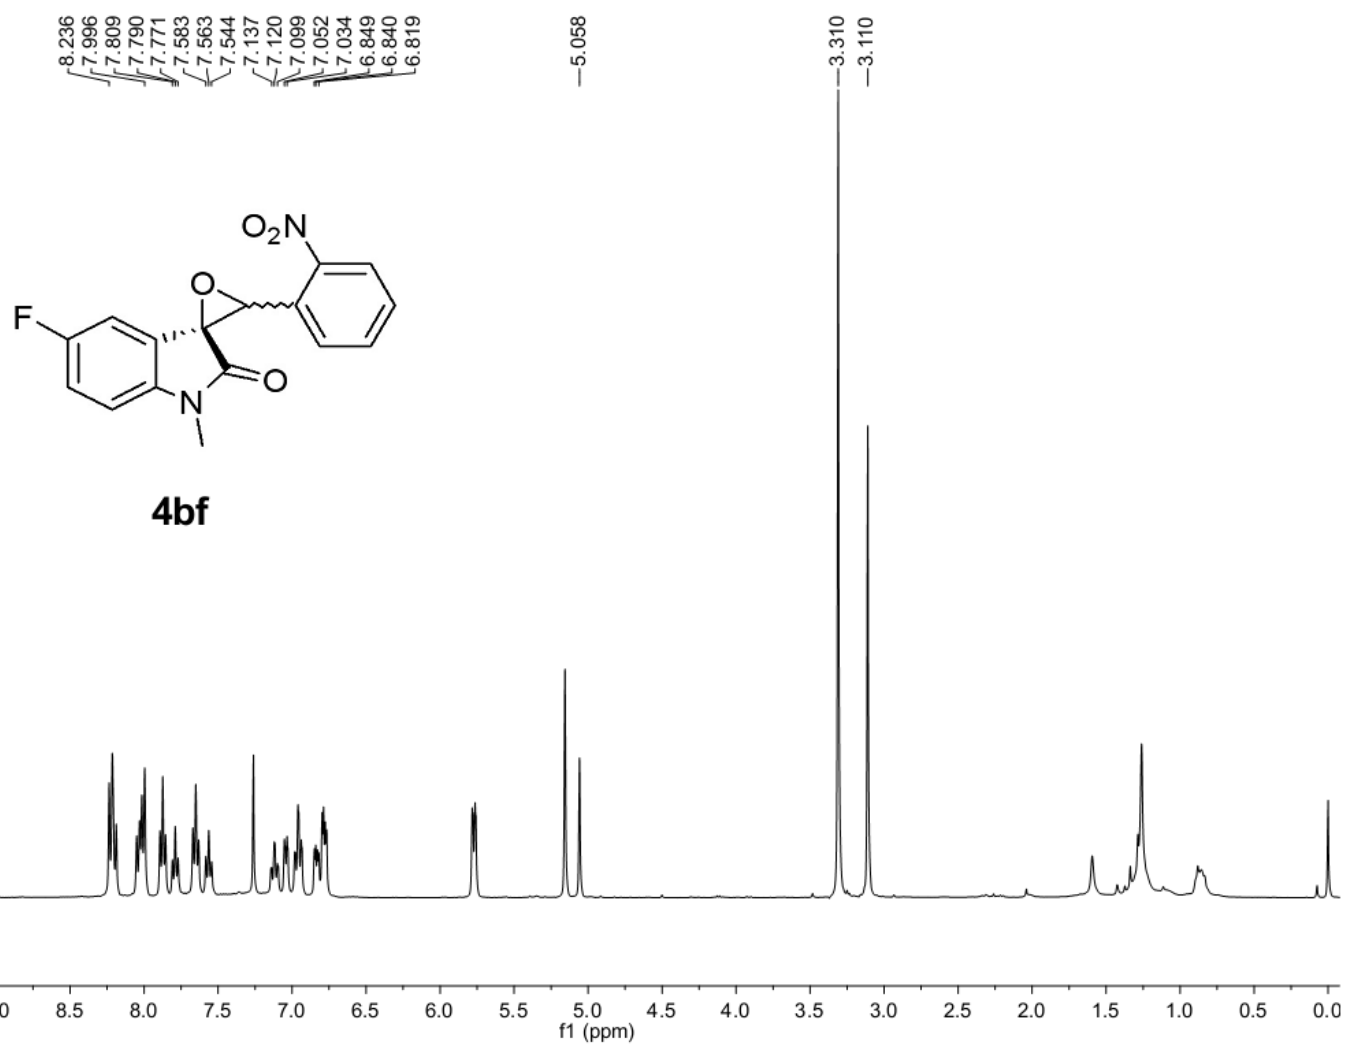

CMQ-4145  
boss boss a HWH

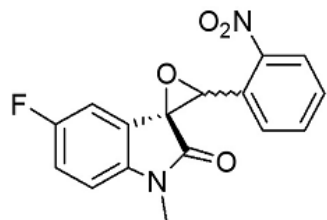

**4bf**

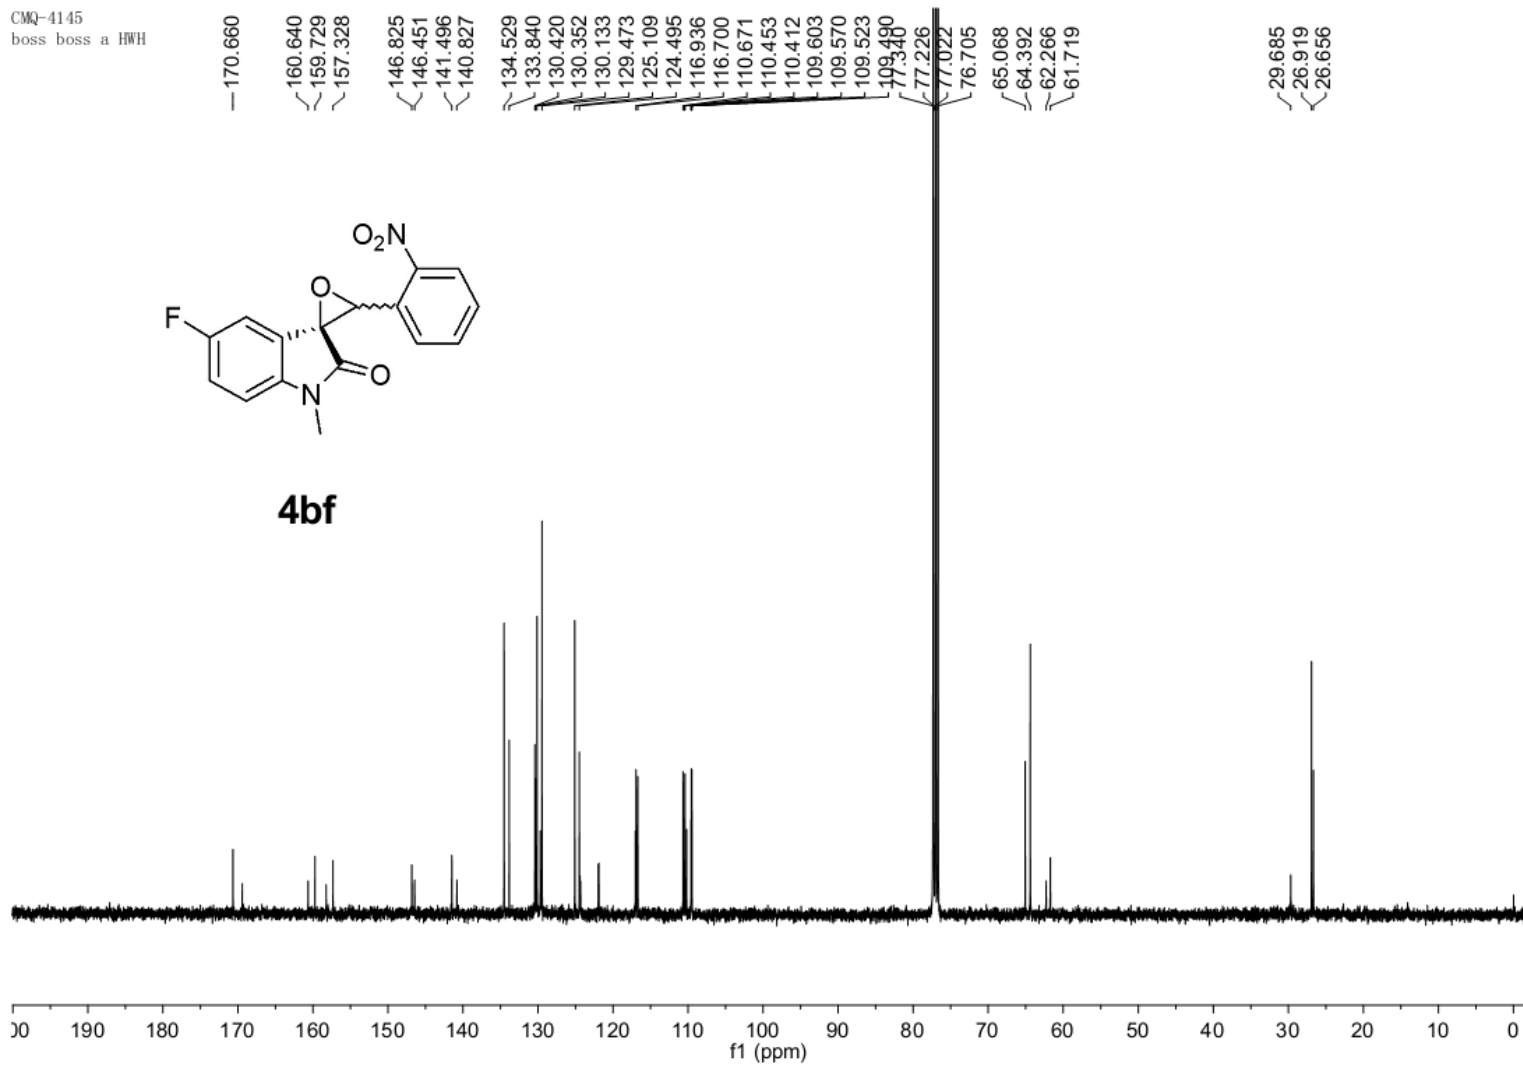



CMQ-4137  
boss boss a

7.783  
7.764  
7.703  
7.684  
6.843  
6.833  
6.822  
6.812  
6.798  
6.787  
5.956  
5.950  
5.936  
5.931

4.816  
4.746

3.301  
3.144

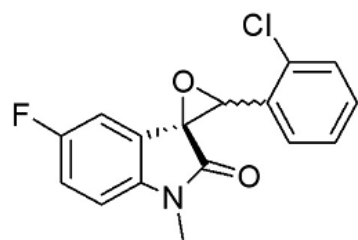

**4cf**

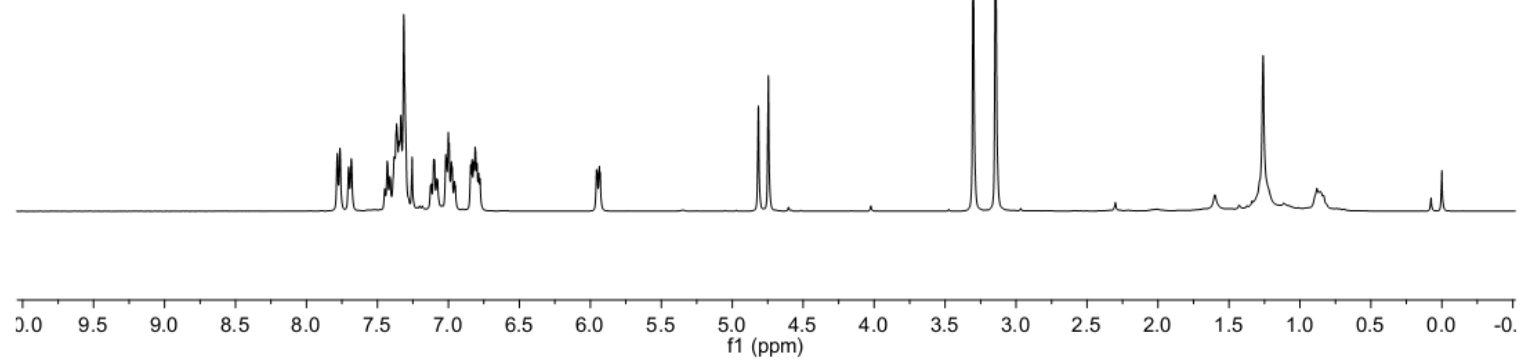

CMQ-4137  
boss boss a

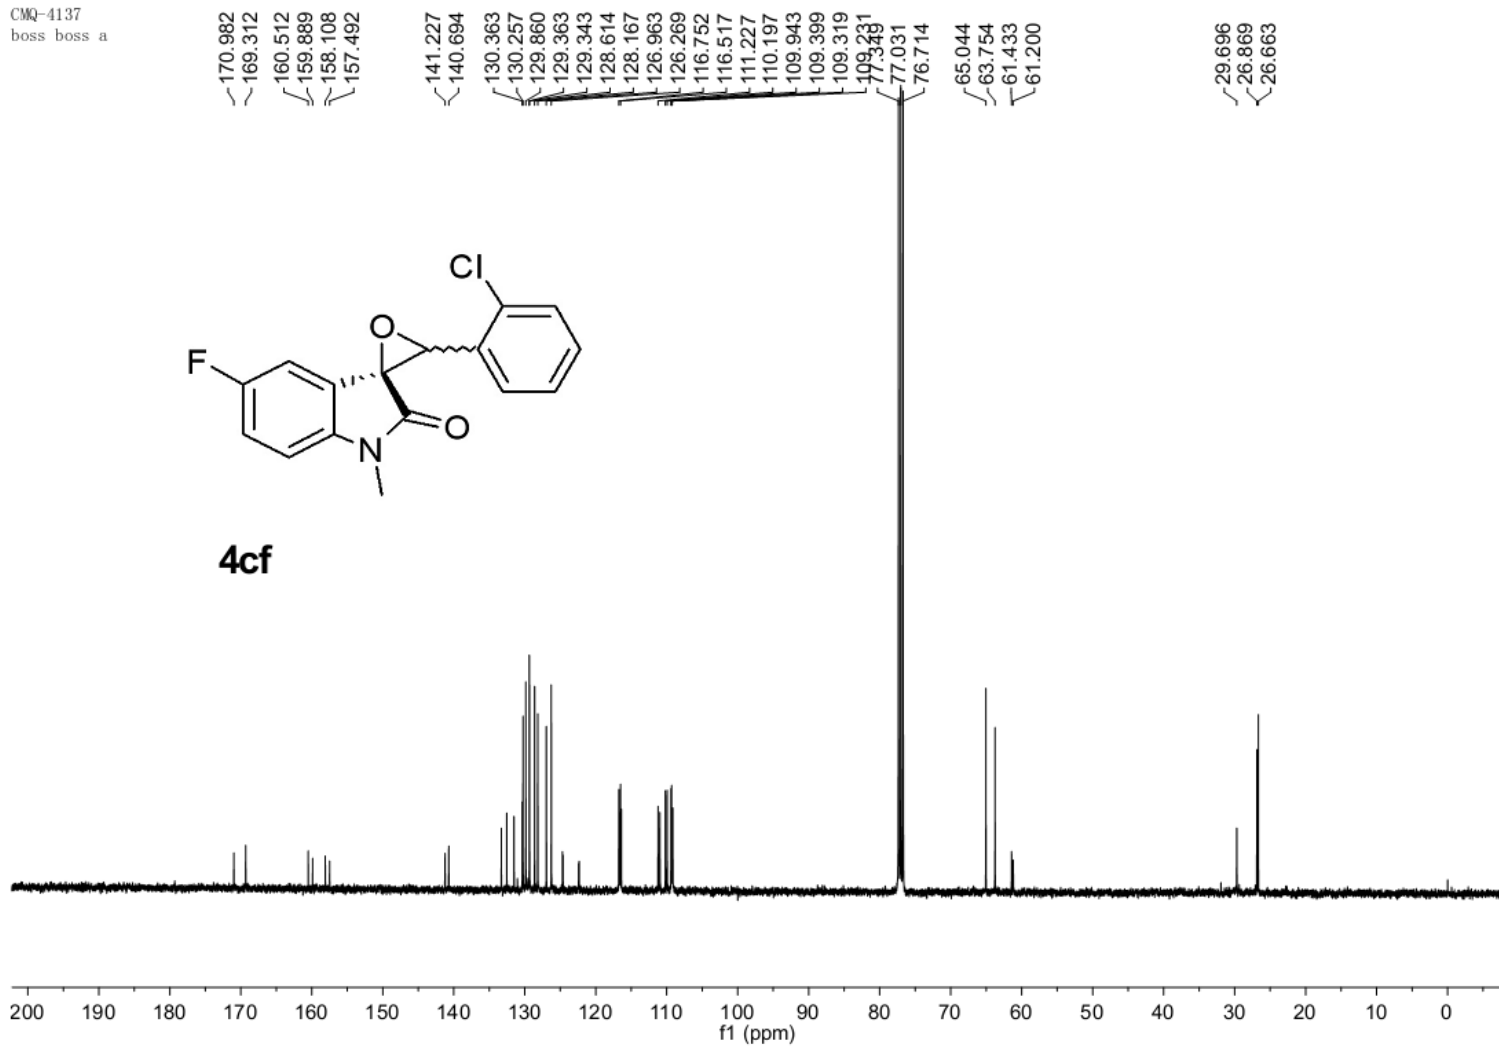

CMQ-41352  
boss HWH

7.339  
7.250  
7.115  
7.111  
7.093  
7.066  
7.037  
7.032  
6.970  
6.965  
6.952  
6.830  
6.821  
6.809  
6.800

—4.598

—3.139

—1.259

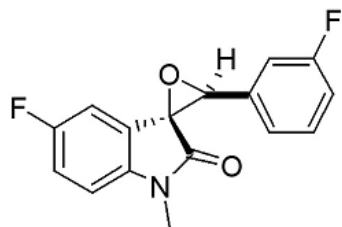

**cis-4df**

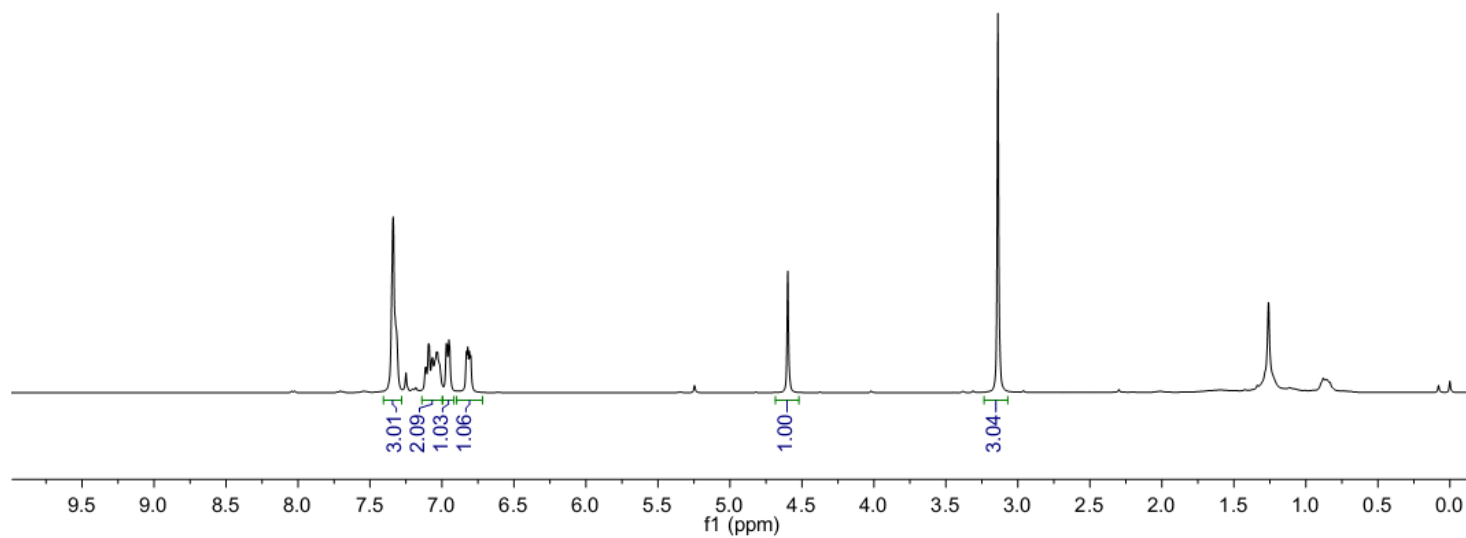

CMQ-41352  
boss HWH

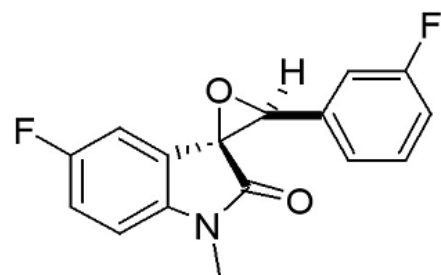

**cis-4df**

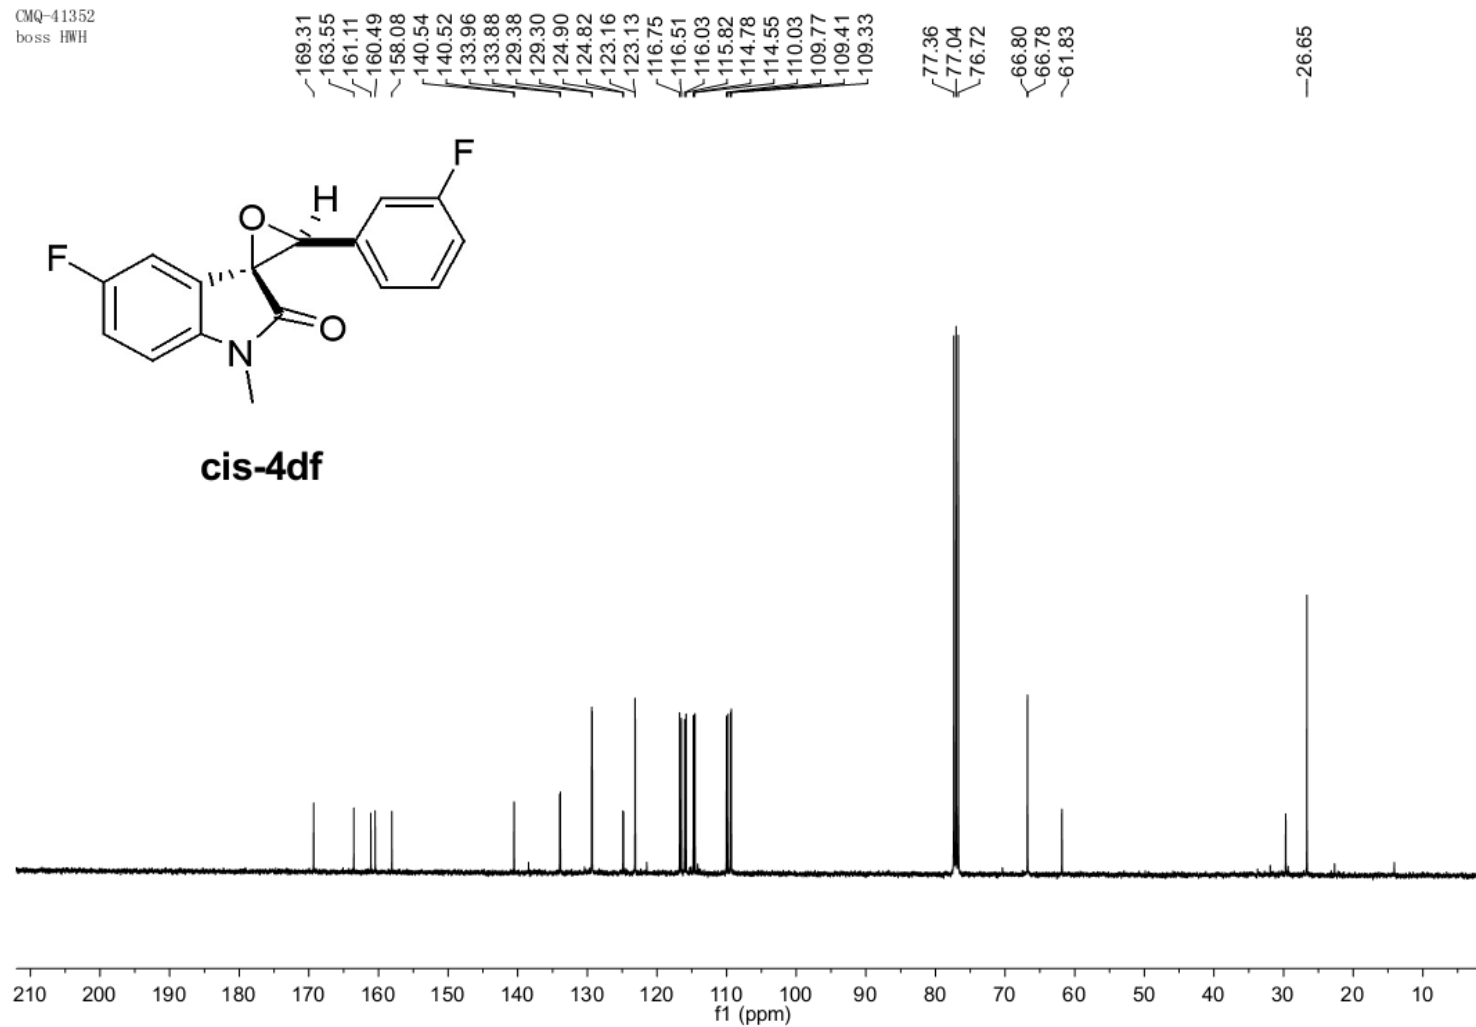

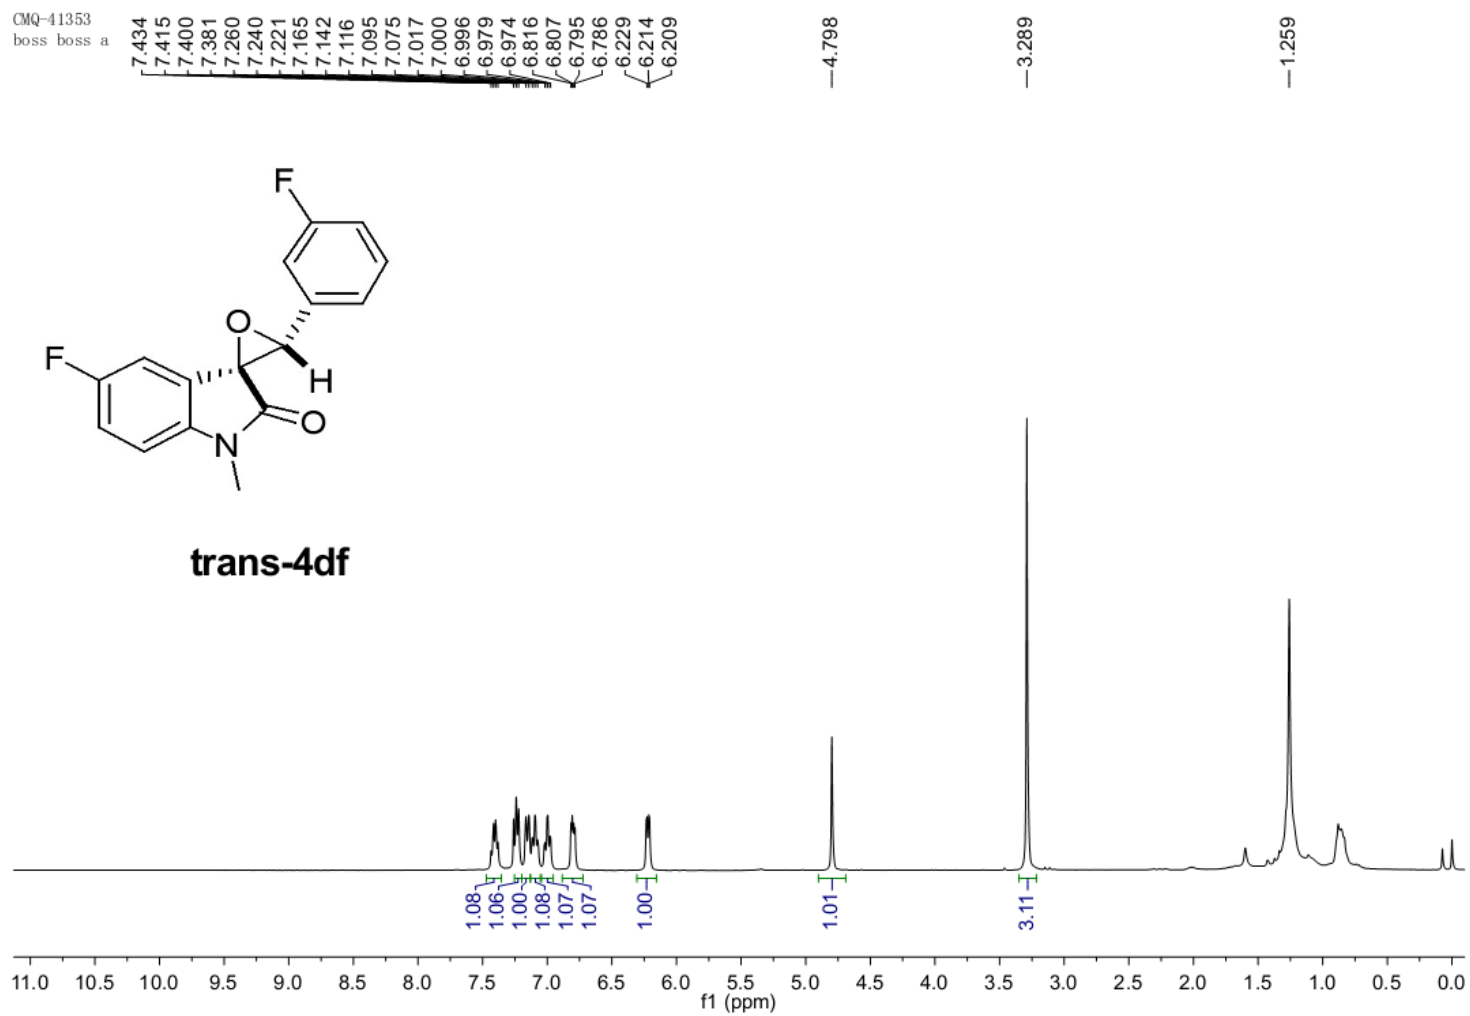

CMQ-41353  
boss HWH  
CMQ-41353

171.04  
164.07  
161.60  
159.93  
157.53

141.26  
135.36  
135.28  
130.52  
130.43

122.30  
122.27  
116.78  
116.55  
116.19  
115.99  
113.93  
113.70  
111.88  
111.62  
109.31  
109.33  
77.22  
77.02  
76.70  
64.47  
64.44  
61.48

26.80

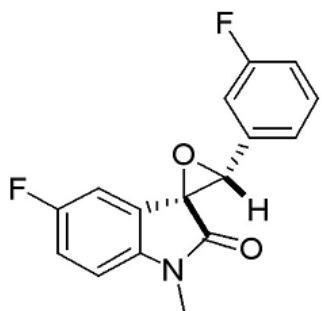

**trans-4df**

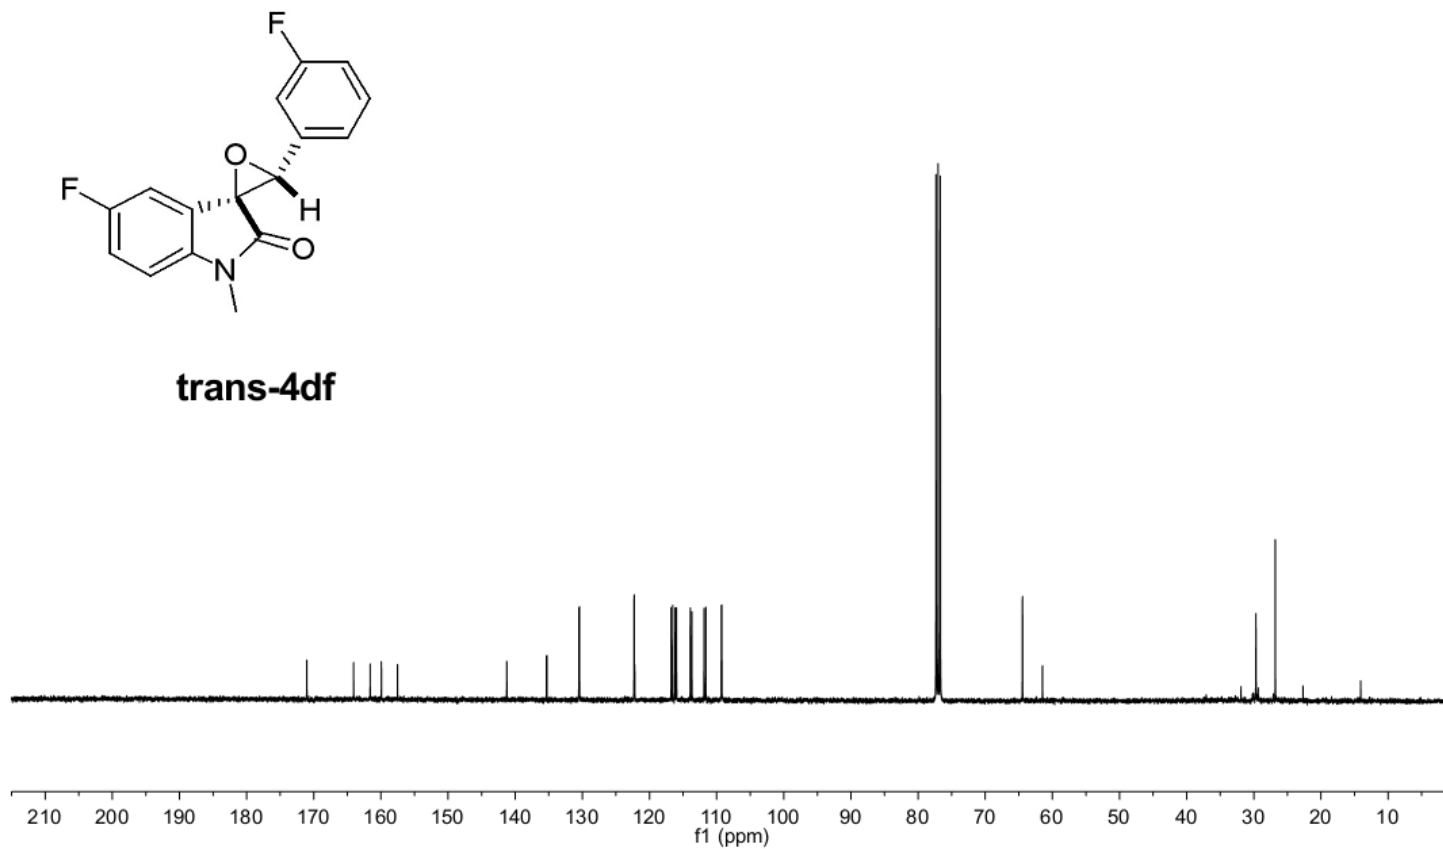

CMQ-41412  
boss boss a HWH  
CMQ-41412

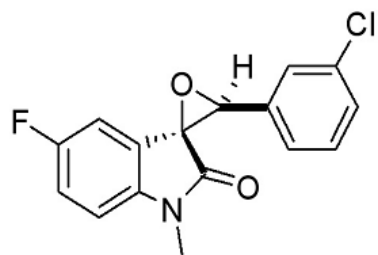

**cis-4ef**

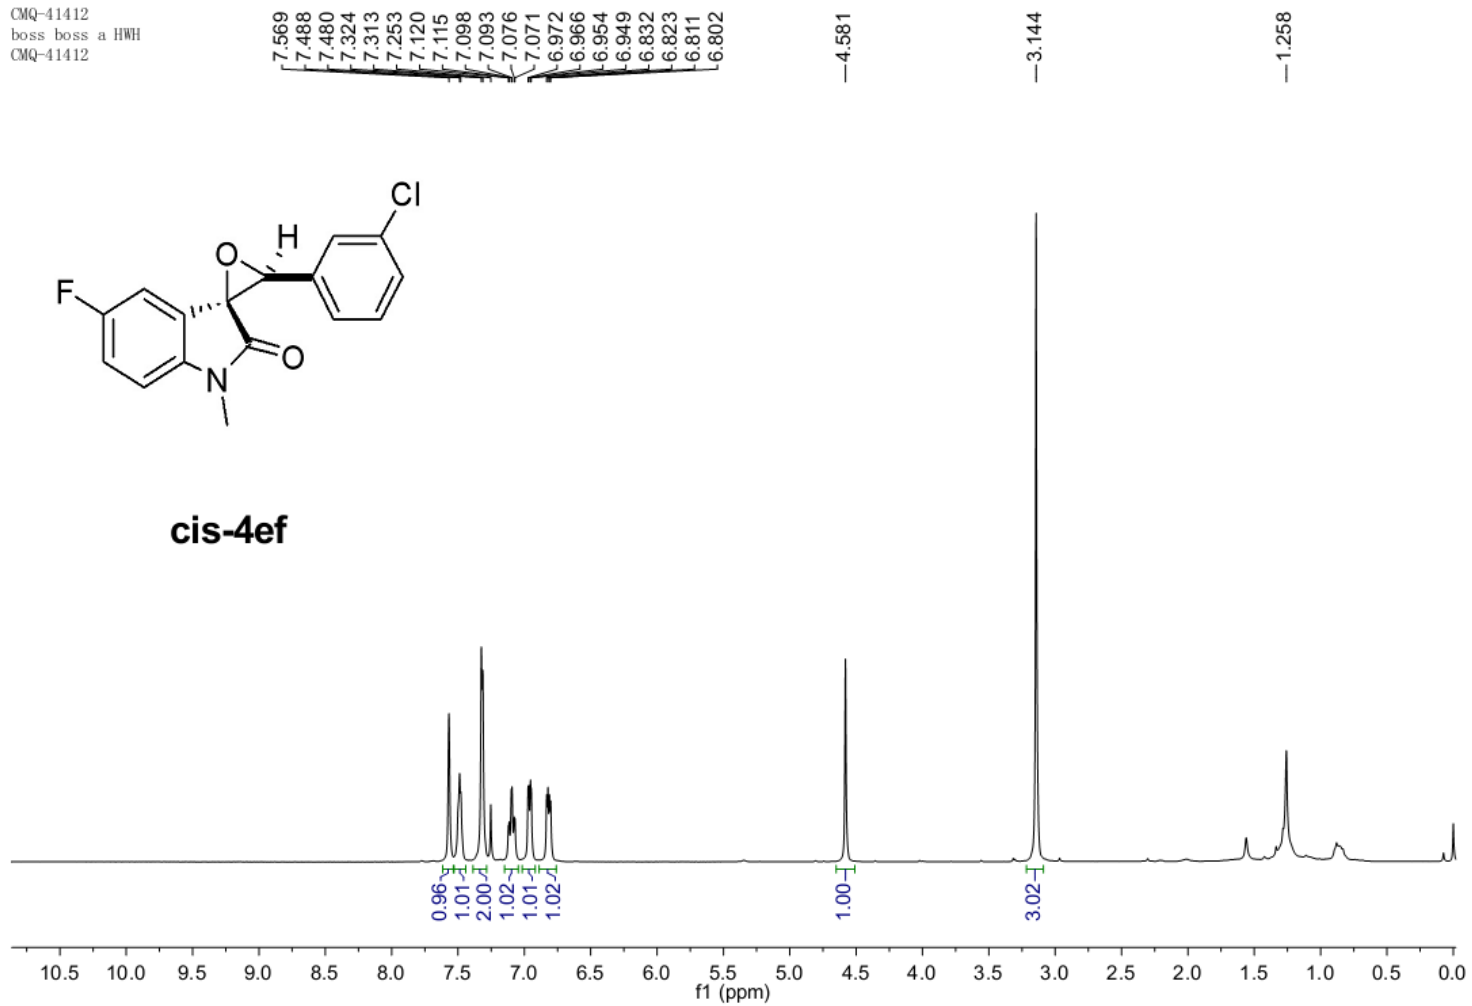

CMQ-41412  
boss boss a HWH  
CMQ-41412

169.27  
160.49  
158.08  
140.54  
133.84  
133.40  
129.09  
129.02  
127.63  
125.64  
124.85  
124.76  
116.77  
116.53  
110.03  
109.78  
109.41  
109.33

77.34  
77.22  
77.02  
76.70  
66.68  
61.78

26.67

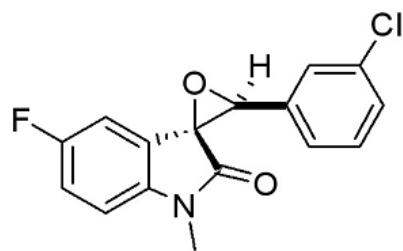

**cis-4ef**

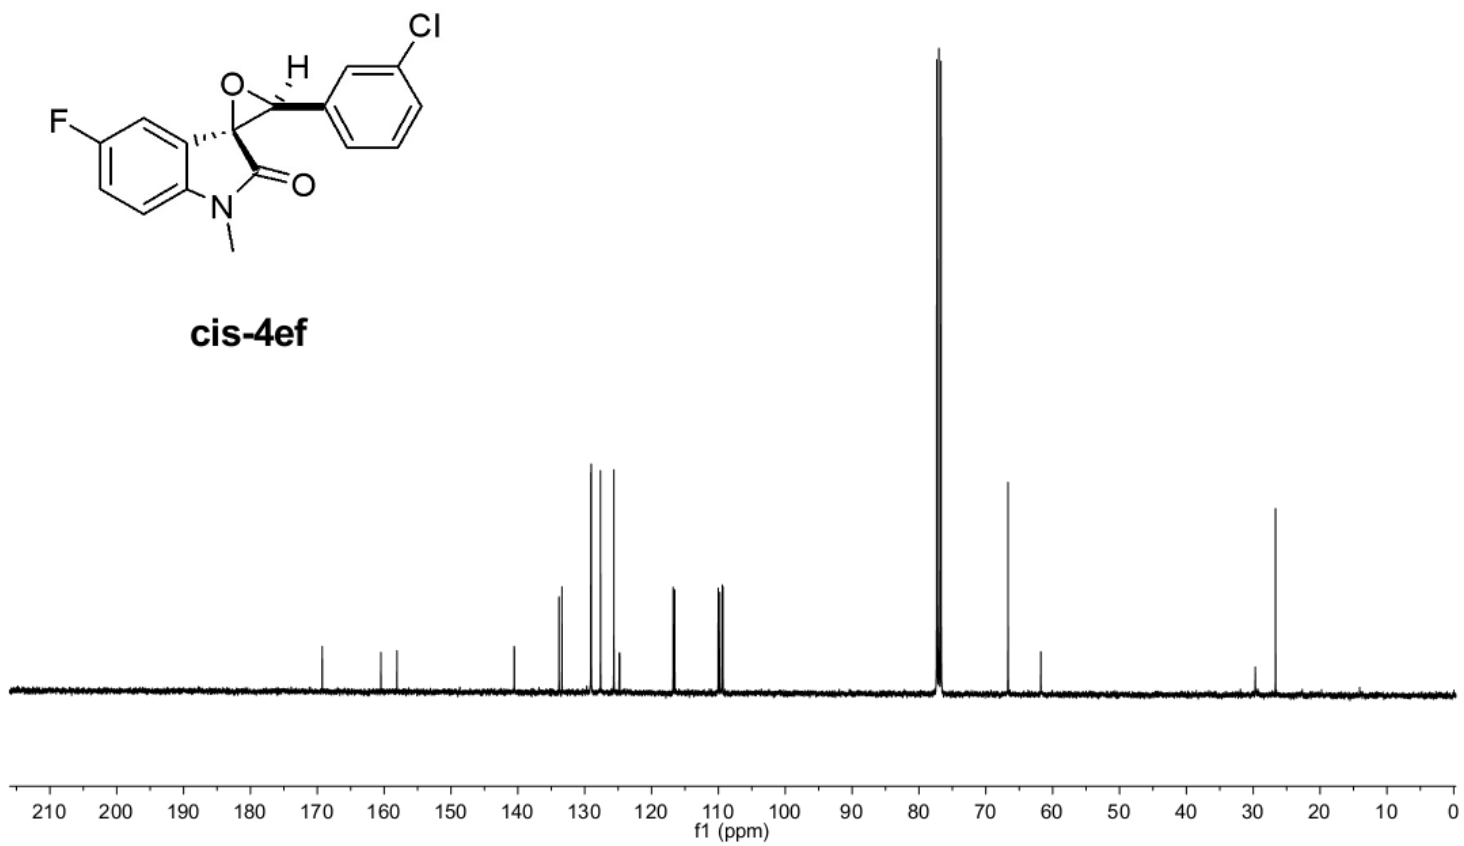



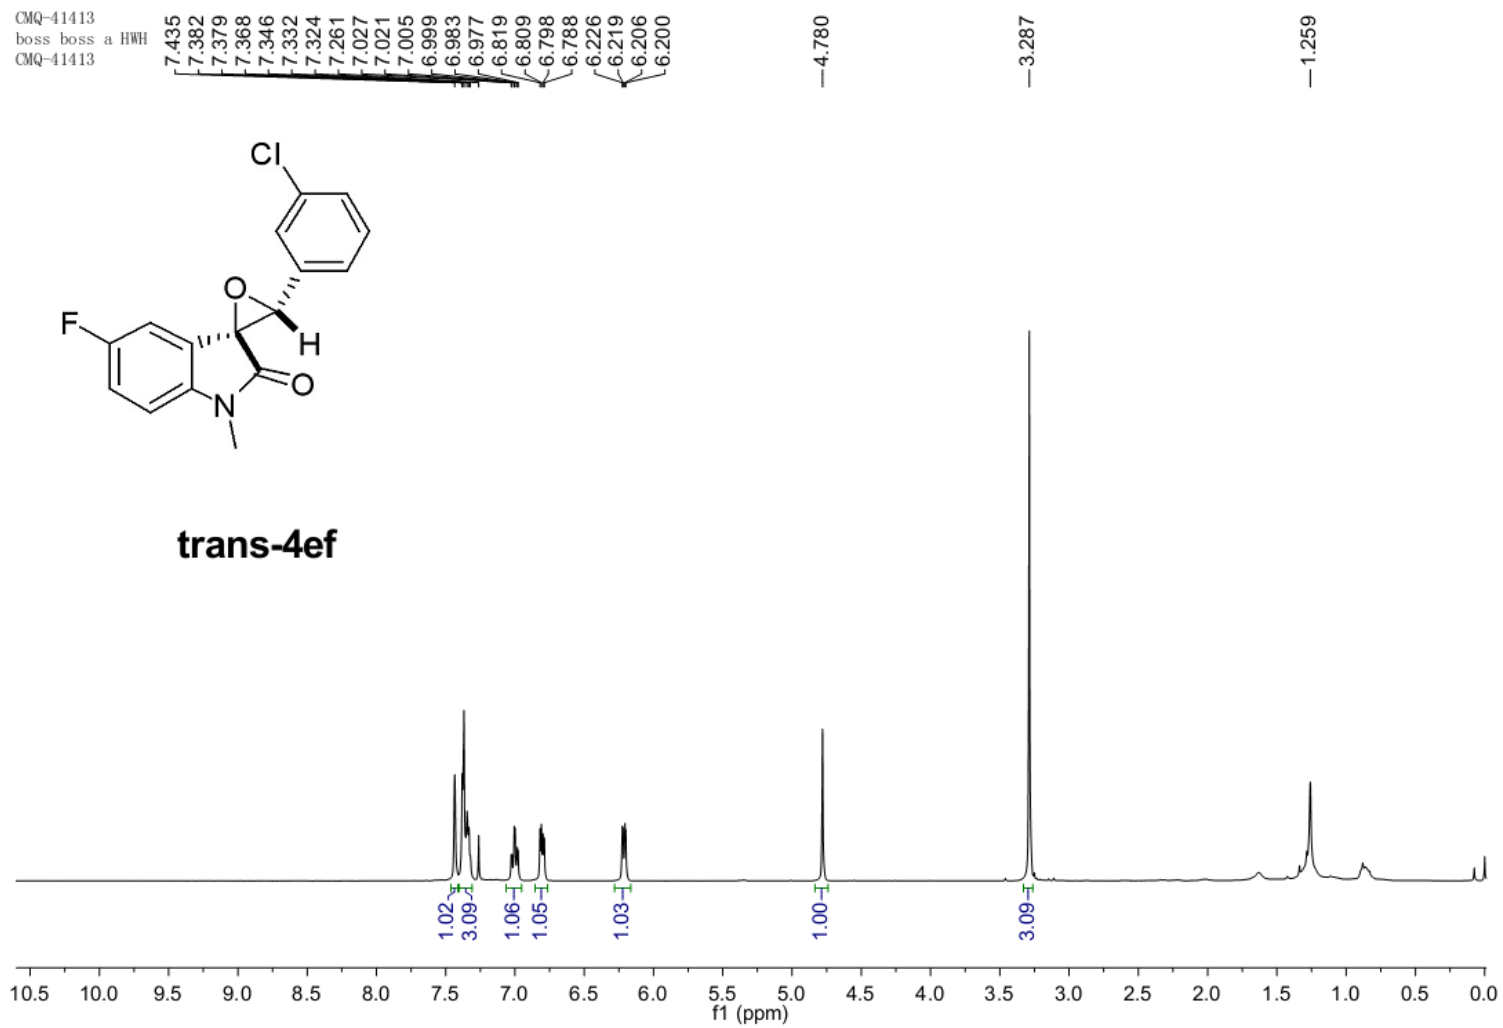

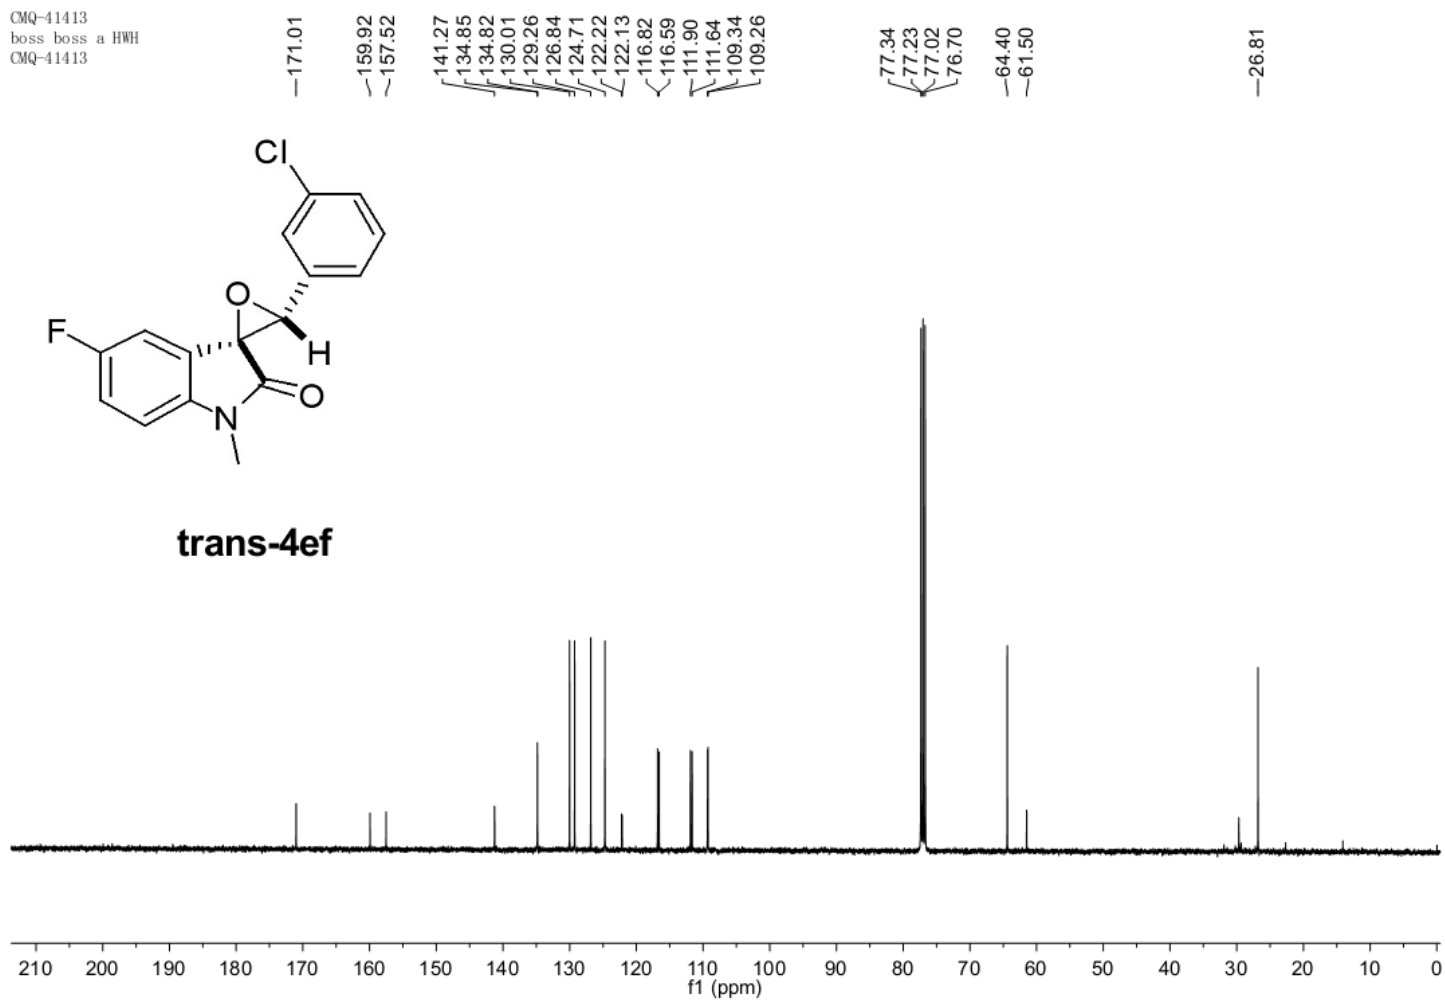

cmq-41432  
boss HWH  
cmq-41432

7.539  
7.519  
7.356  
7.336  
7.250  
7.108  
7.088  
7.068  
6.966  
6.951  
6.826  
6.818  
6.806  
6.798

4.583

3.135

1.259

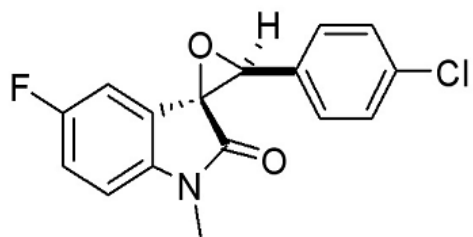

**cis-4ff**

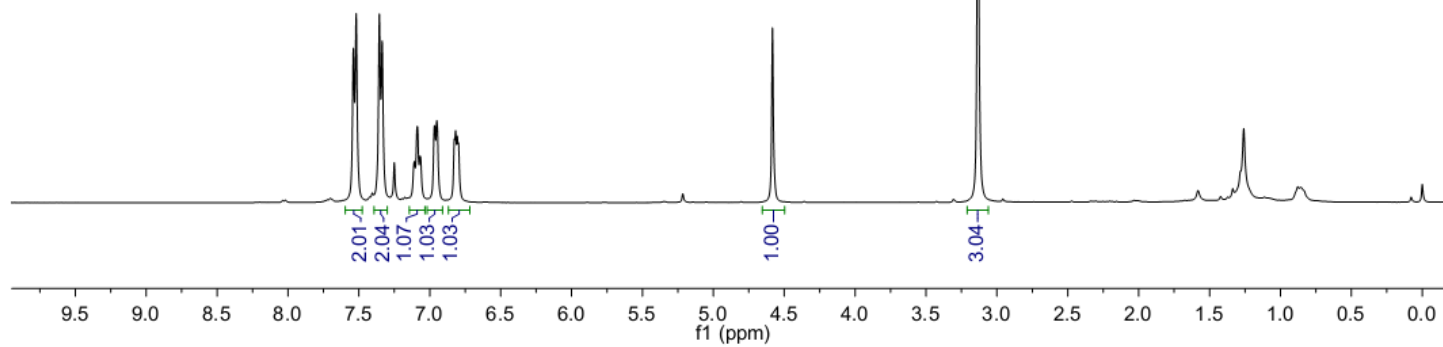

cmq-41432  
boss HWH  
cmq-41432

—169.44  
—160.49  
—158.08  
140.47  
140.45  
134.89  
129.83  
128.88  
128.01  
124.97  
124.89  
116.69  
116.46  
109.99  
109.73  
109.41  
109.33  
77.36  
77.25  
77.04  
76.73  
—67.00  
—61.84  
—26.65

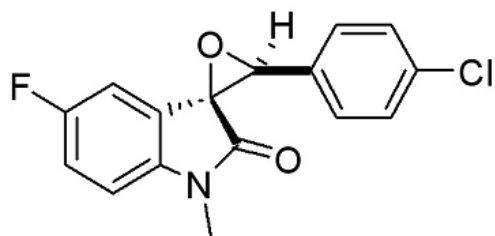

**cis-4ff**

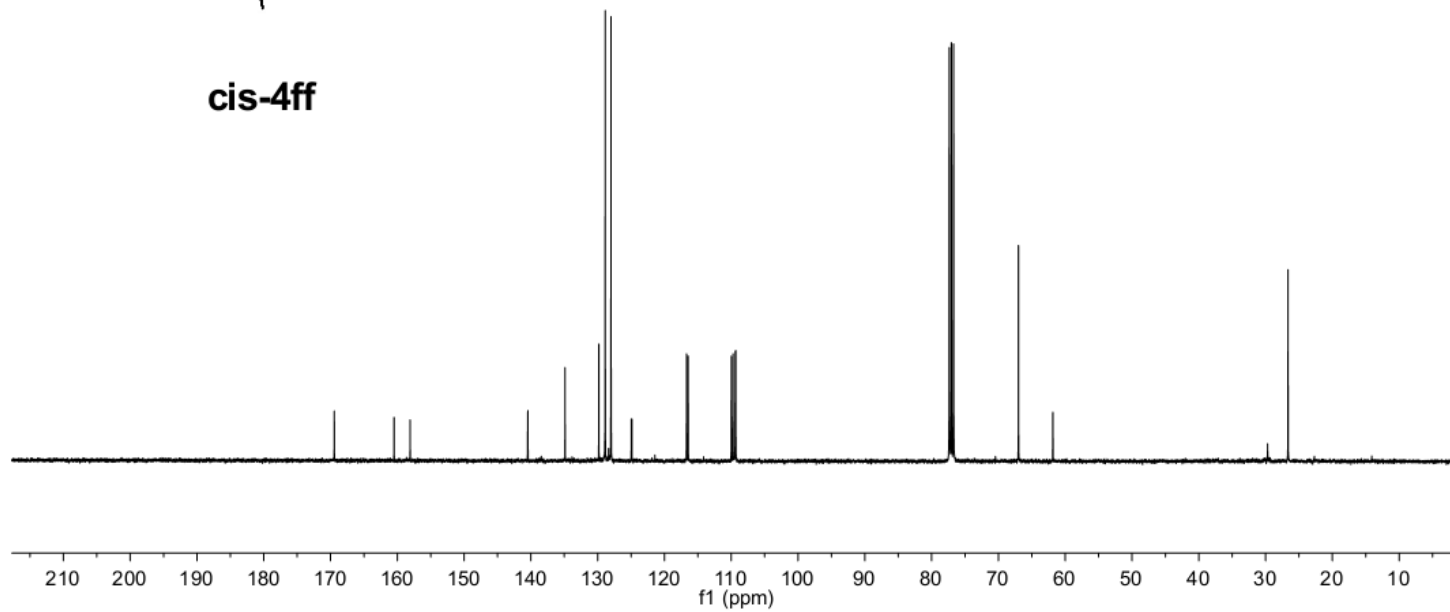

CMQ-41433  
boss HWH  
CMQ-41433

7.422  
7.401  
7.389  
7.369  
7.262  
7.021  
7.016  
7.000  
6.978  
6.814  
6.804  
6.793  
6.784  
6.221  
6.202

—4.778

—3.284

—1.260

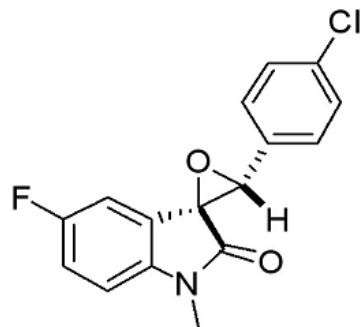

**trans-4ff**

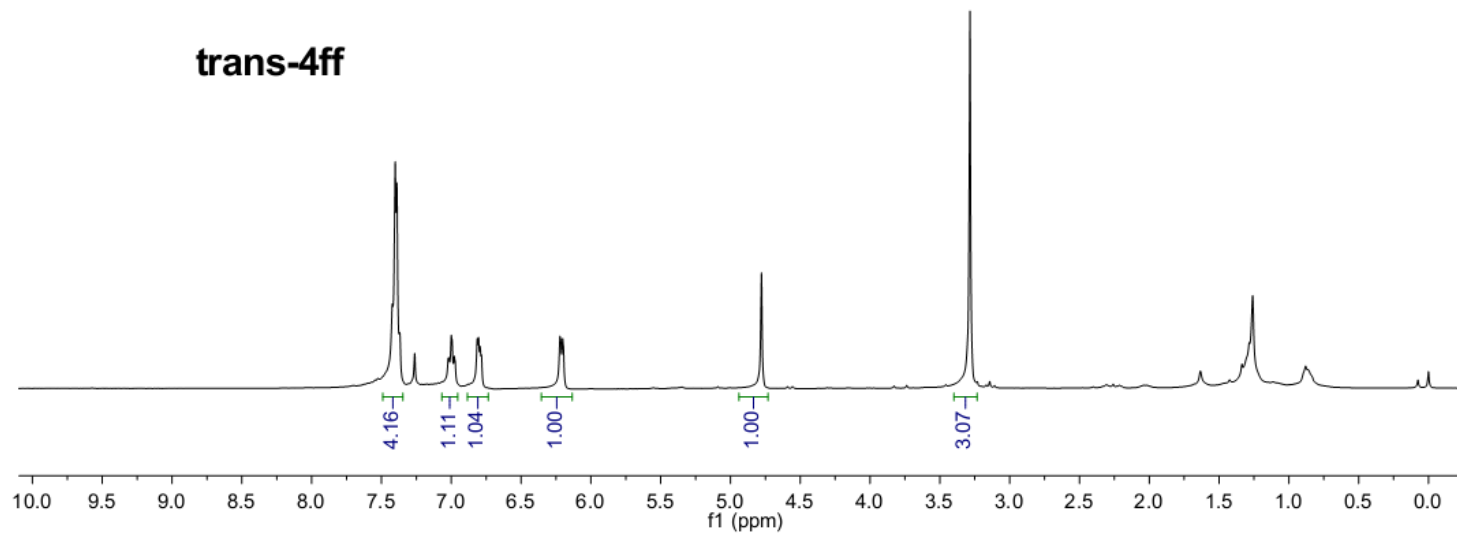

CMQ-41433  
boss HWH  
CMQ-41433

—171.10

—159.91

—157.51

—141.23

—134.97

—131.29

—128.96

—128.01

—122.33

—122.24

—116.75

—116.51

—111.88

—111.62

—109.31

—109.23

—77.34

—77.23

—77.02

—76.71

—64.60

—61.54

—26.80

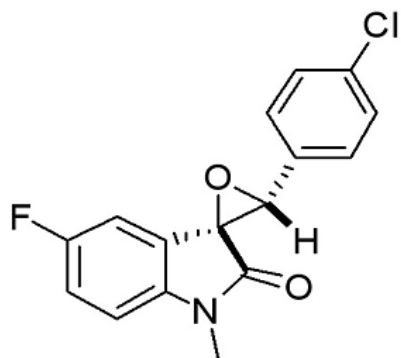

**trans-4ff**

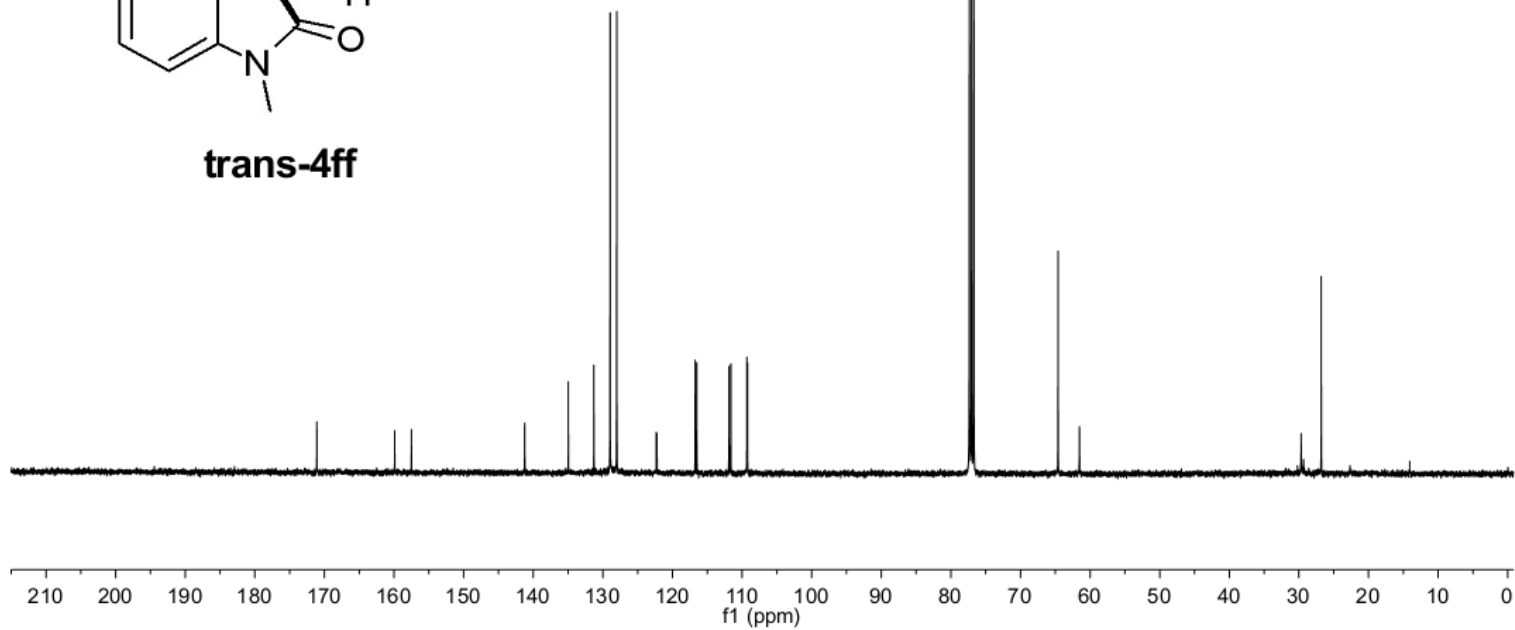

CMQ-4692  
boss boss a HWH  
CMQ-4692

7.266  
7.092  
7.071  
7.050  
7.048  
6.881  
6.879  
6.863  
6.837  
6.828  
6.816  
6.807  
6.499  
6.476  
6.454  
6.432  
6.408  
5.691  
5.647  
5.554  
5.528  
4.007  
3.986  
3.249

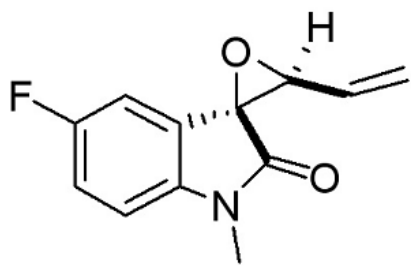

**cis-4gf**

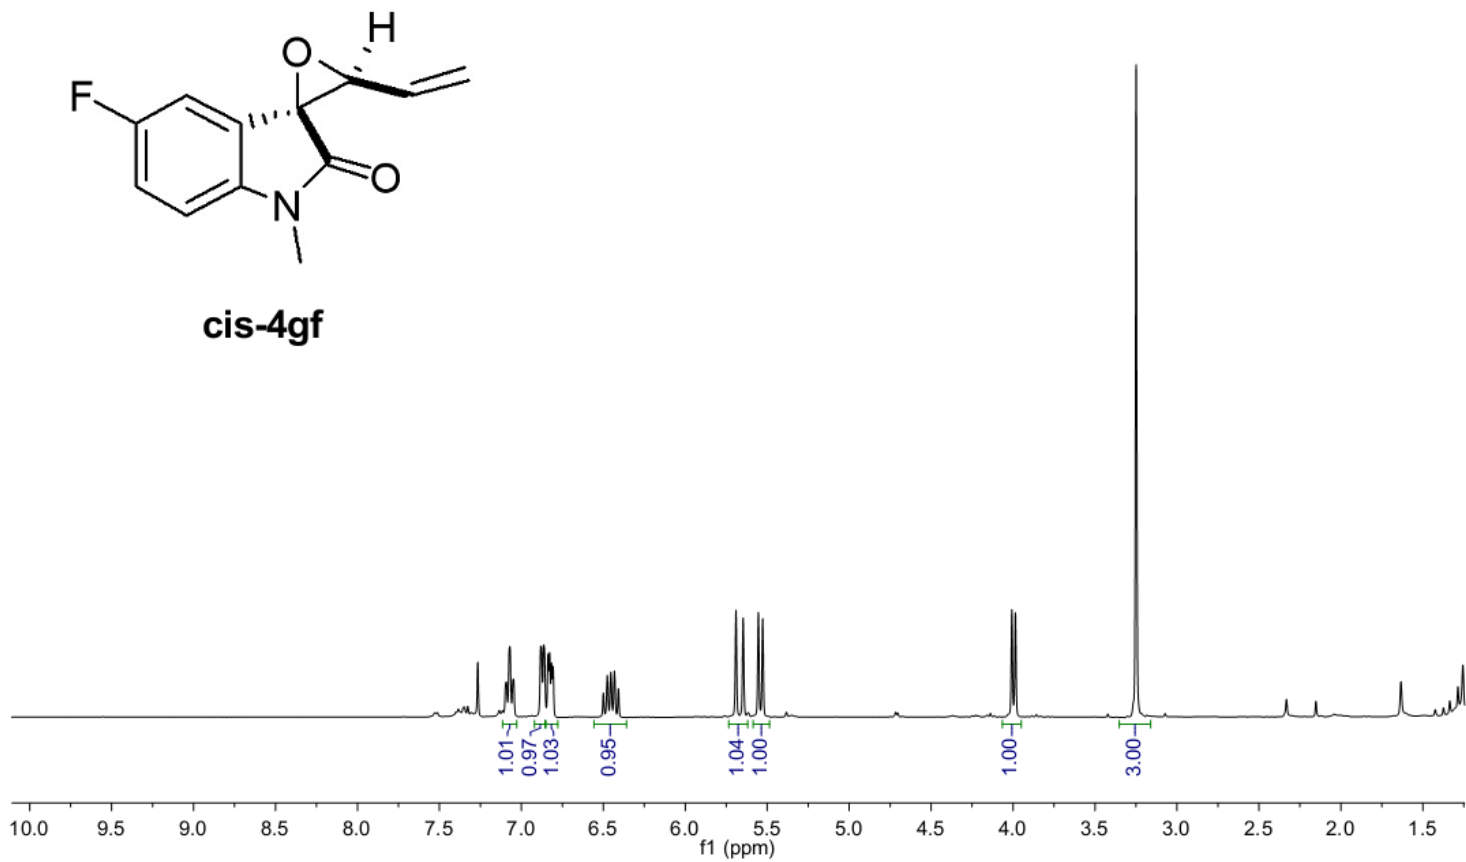

CMQ-4692  
boss boss a HWH  
CMQ-4692

—170.66

—160.50

—158.09

—140.39

—130.58

—124.98

—124.89

—123.83

—116.56

—116.33

—110.01

—109.75

—109.40

—109.32

—77.36

—77.25

—77.04

—76.73

—67.00

—61.66

—26.76

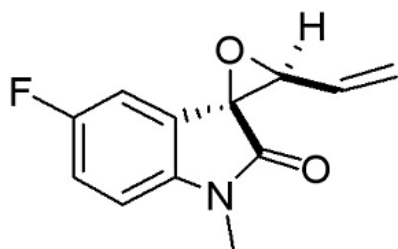

**cis-4gf**

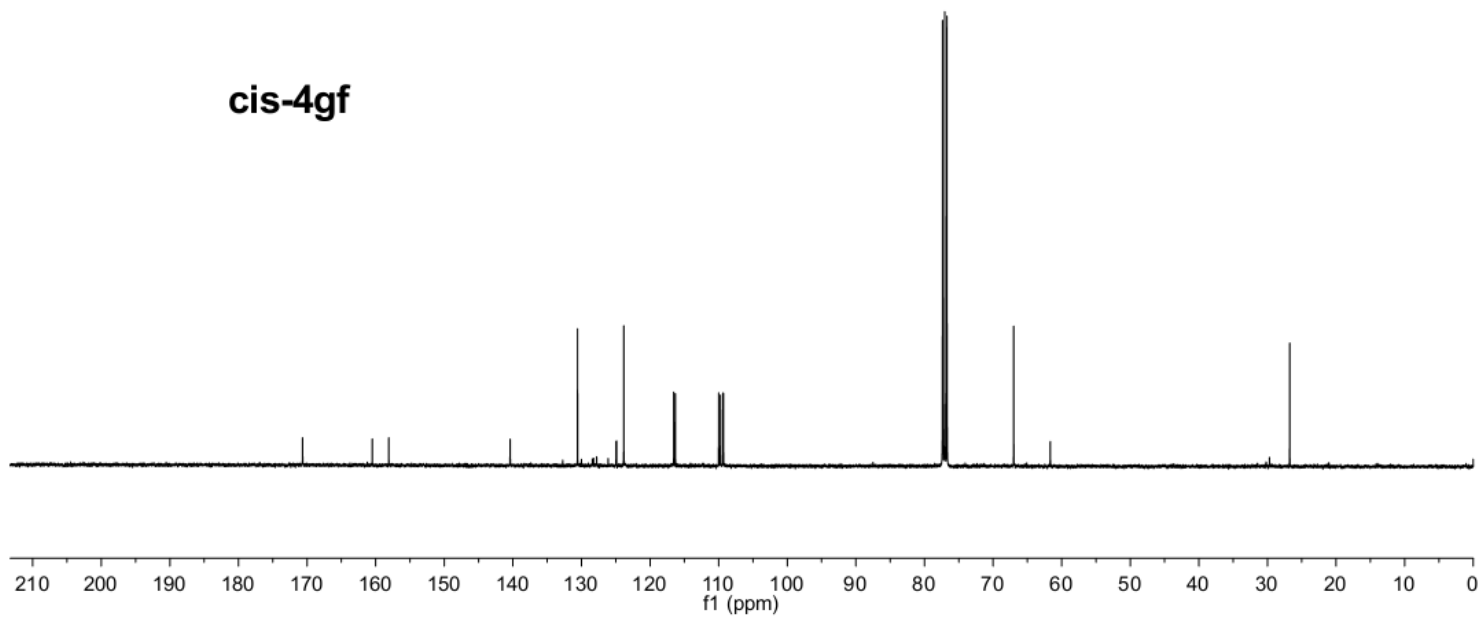



CMQ-4693  
boss boss a HWH  
CMQ-4693

7.269  
7.116  
7.094  
7.072  
6.957  
6.938  
6.861  
6.852  
6.840  
6.831  
5.984  
5.966  
5.958  
5.941  
5.923  
5.915  
5.898  
5.761  
5.718  
5.617  
5.590  
4.156  
4.139  
3.267

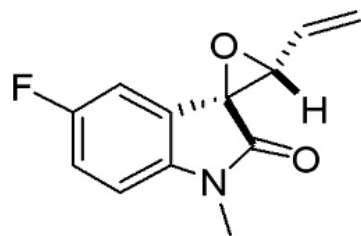

**trans-4gf**

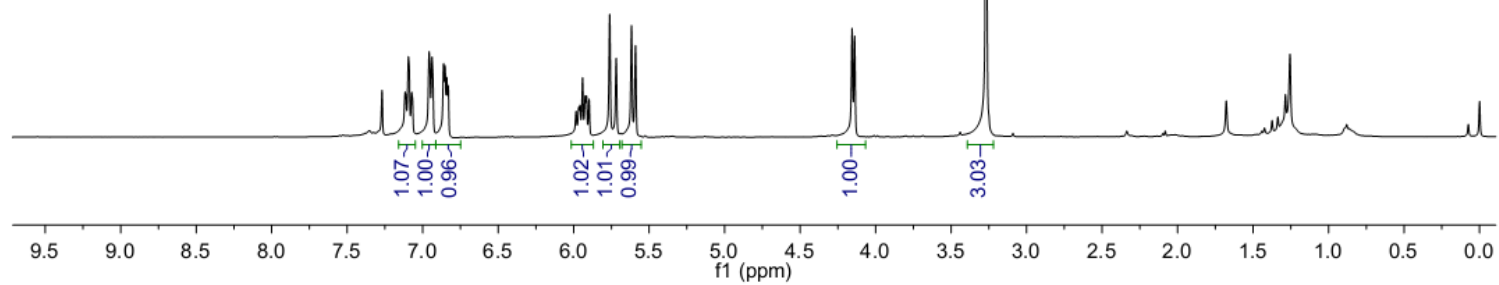

CMQ-4693  
boss boss a HWH  
CMQ-4693

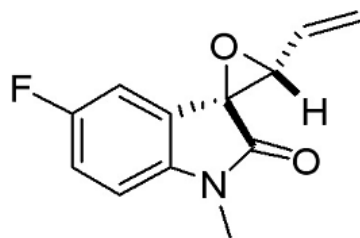

**trans-4gf**

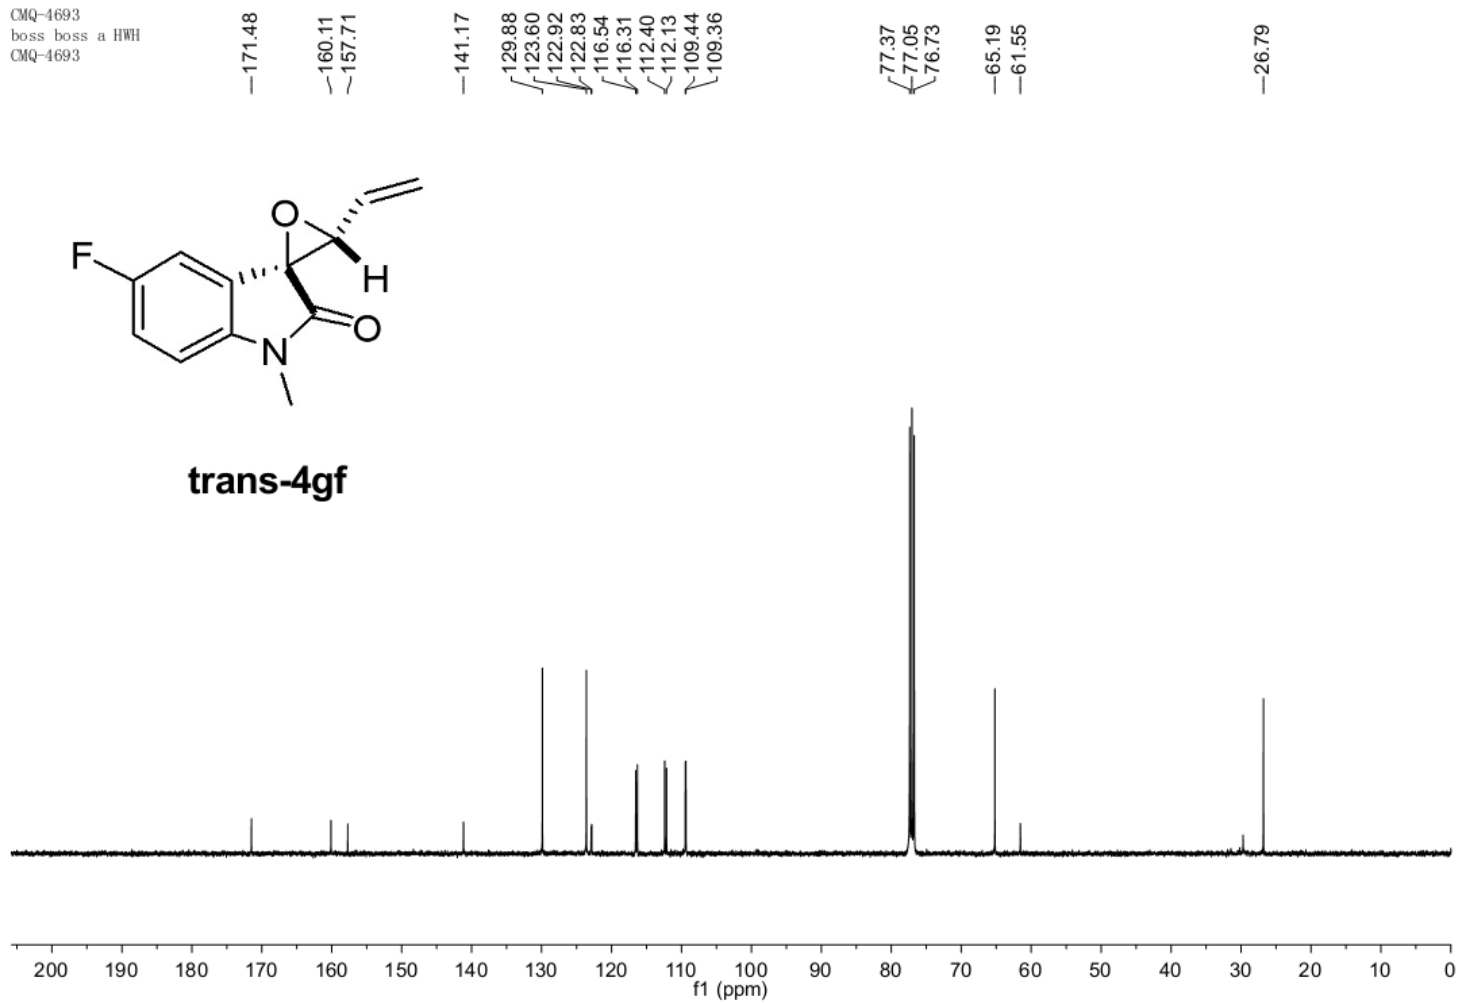

cmq-4302  
boss HWH  
cmq-4302

7.614  
7.596  
7.419  
7.401  
7.382  
7.363  
7.260  
7.116  
7.095  
7.072  
6.997  
6.979  
6.827  
6.811  
6.806

—4.640

—3.141

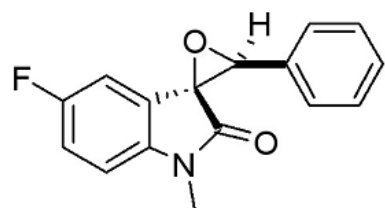

**cis-4hf**

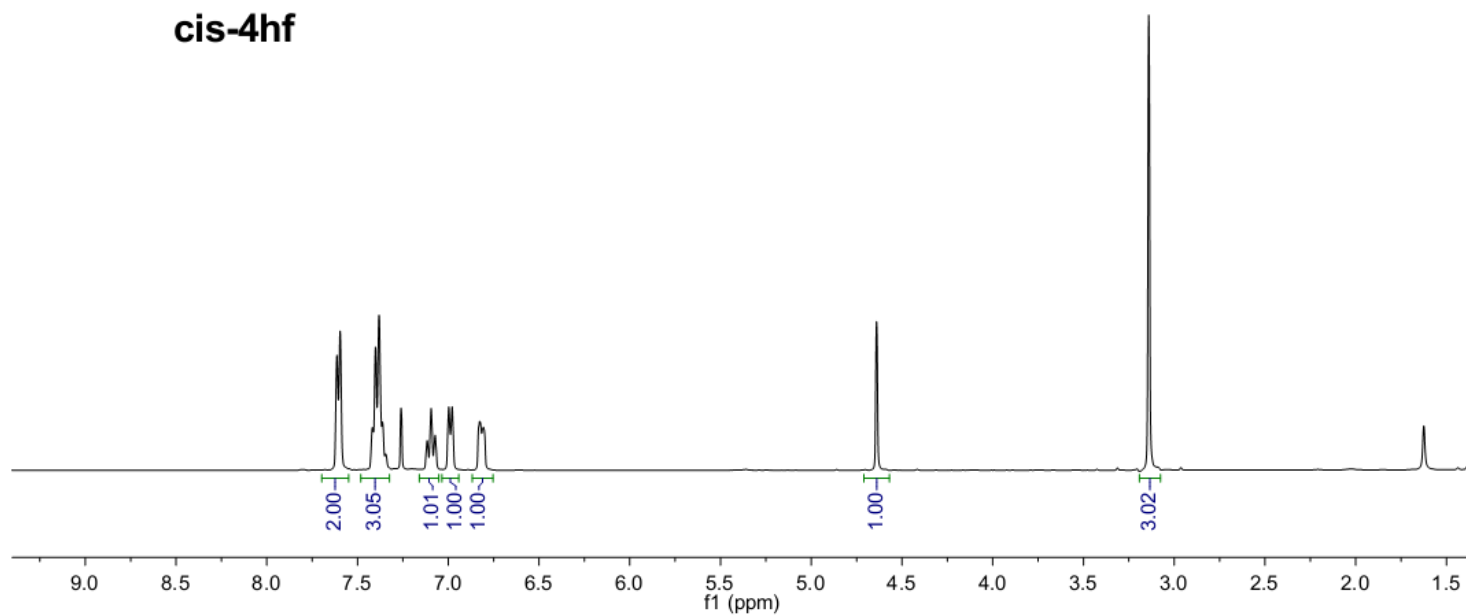

cmq-4302  
boss HWH  
cmq-4302

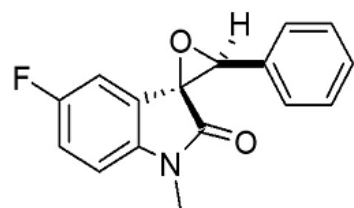

**cis-4hf**

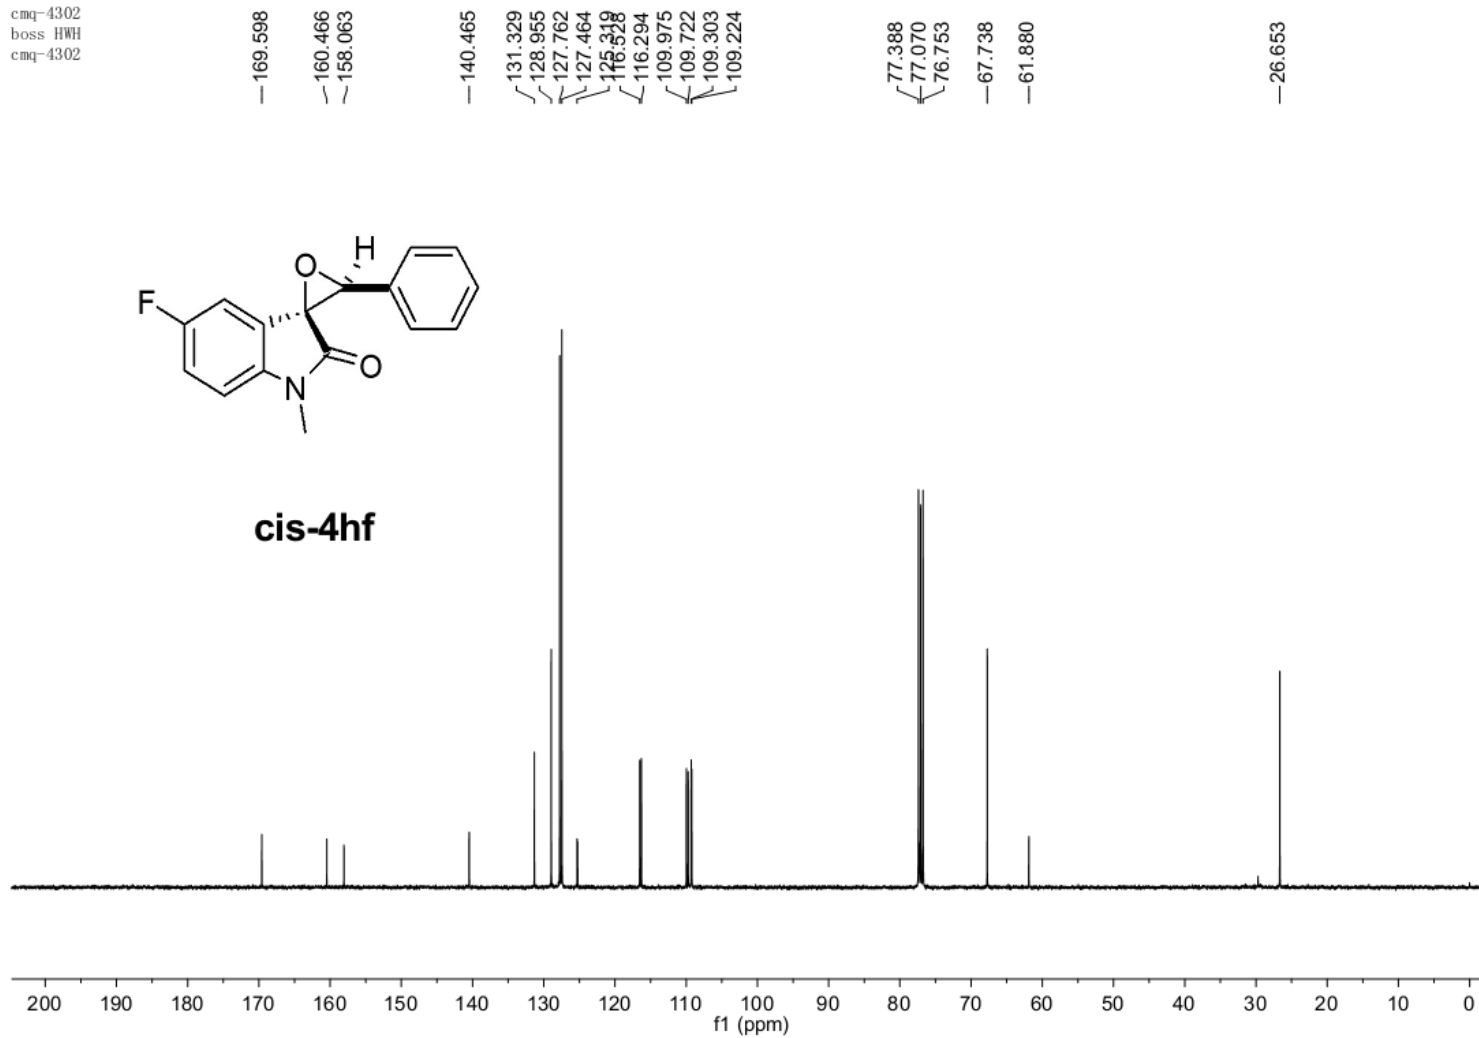

cmq-4303  
boss HWH  
cmq-4303

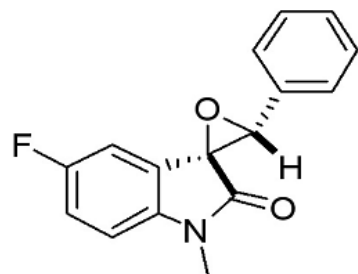

**trans-4hf**

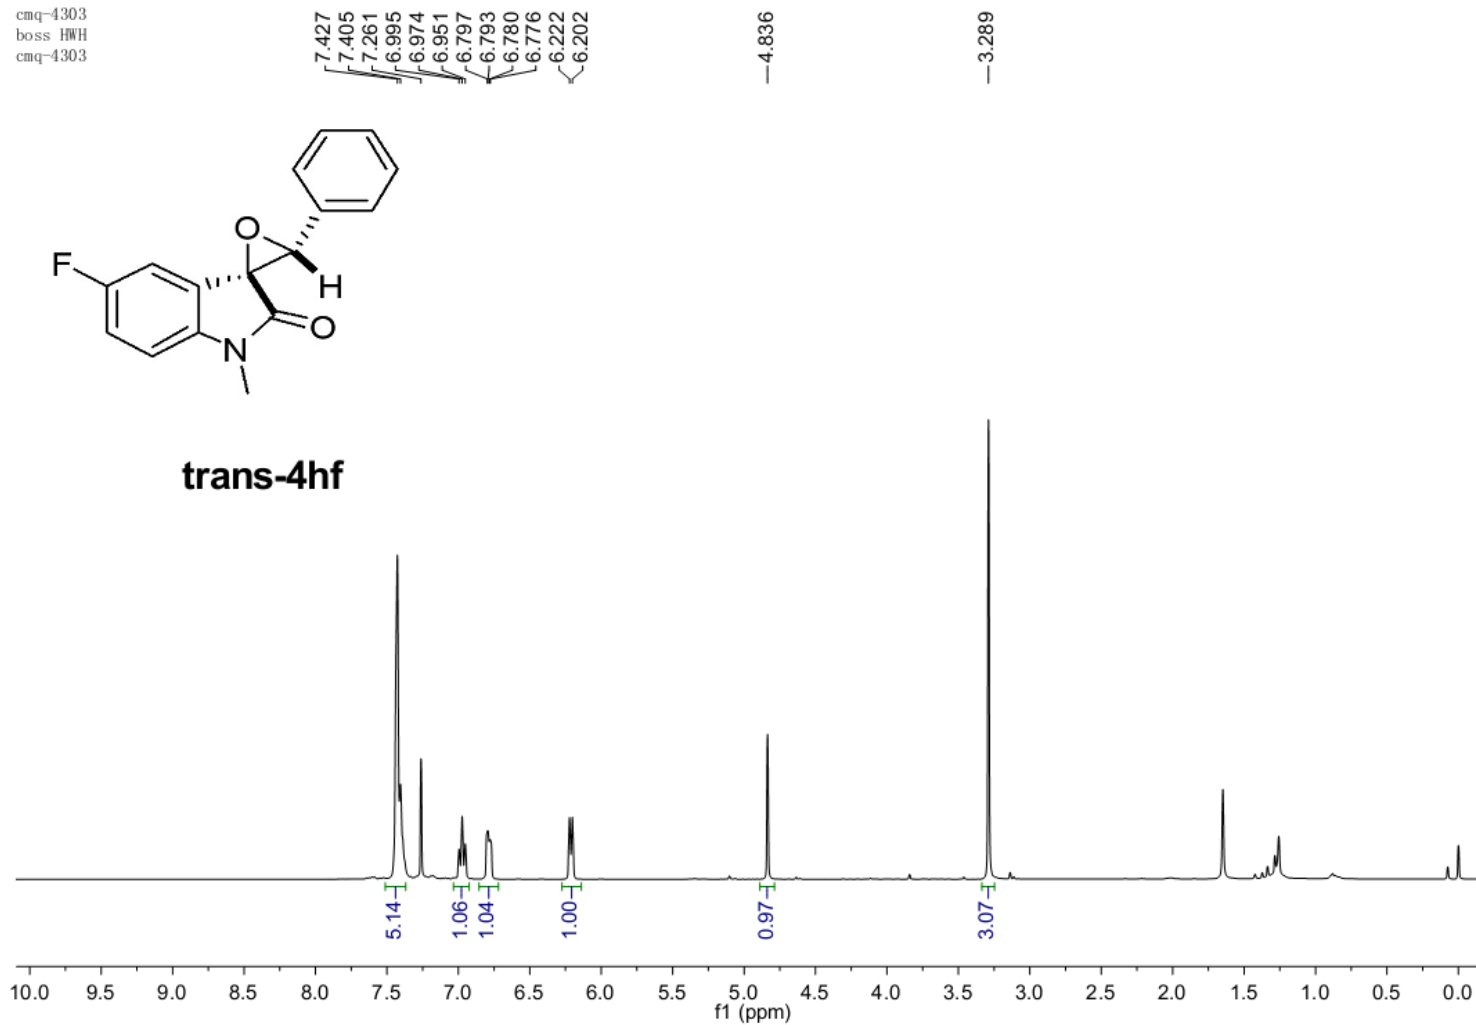

cmq-4303  
boss HWH  
cmq-4303

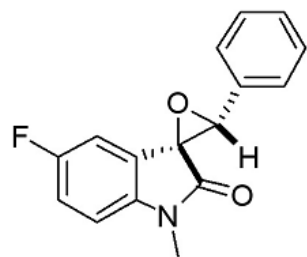

**trans-4hf**

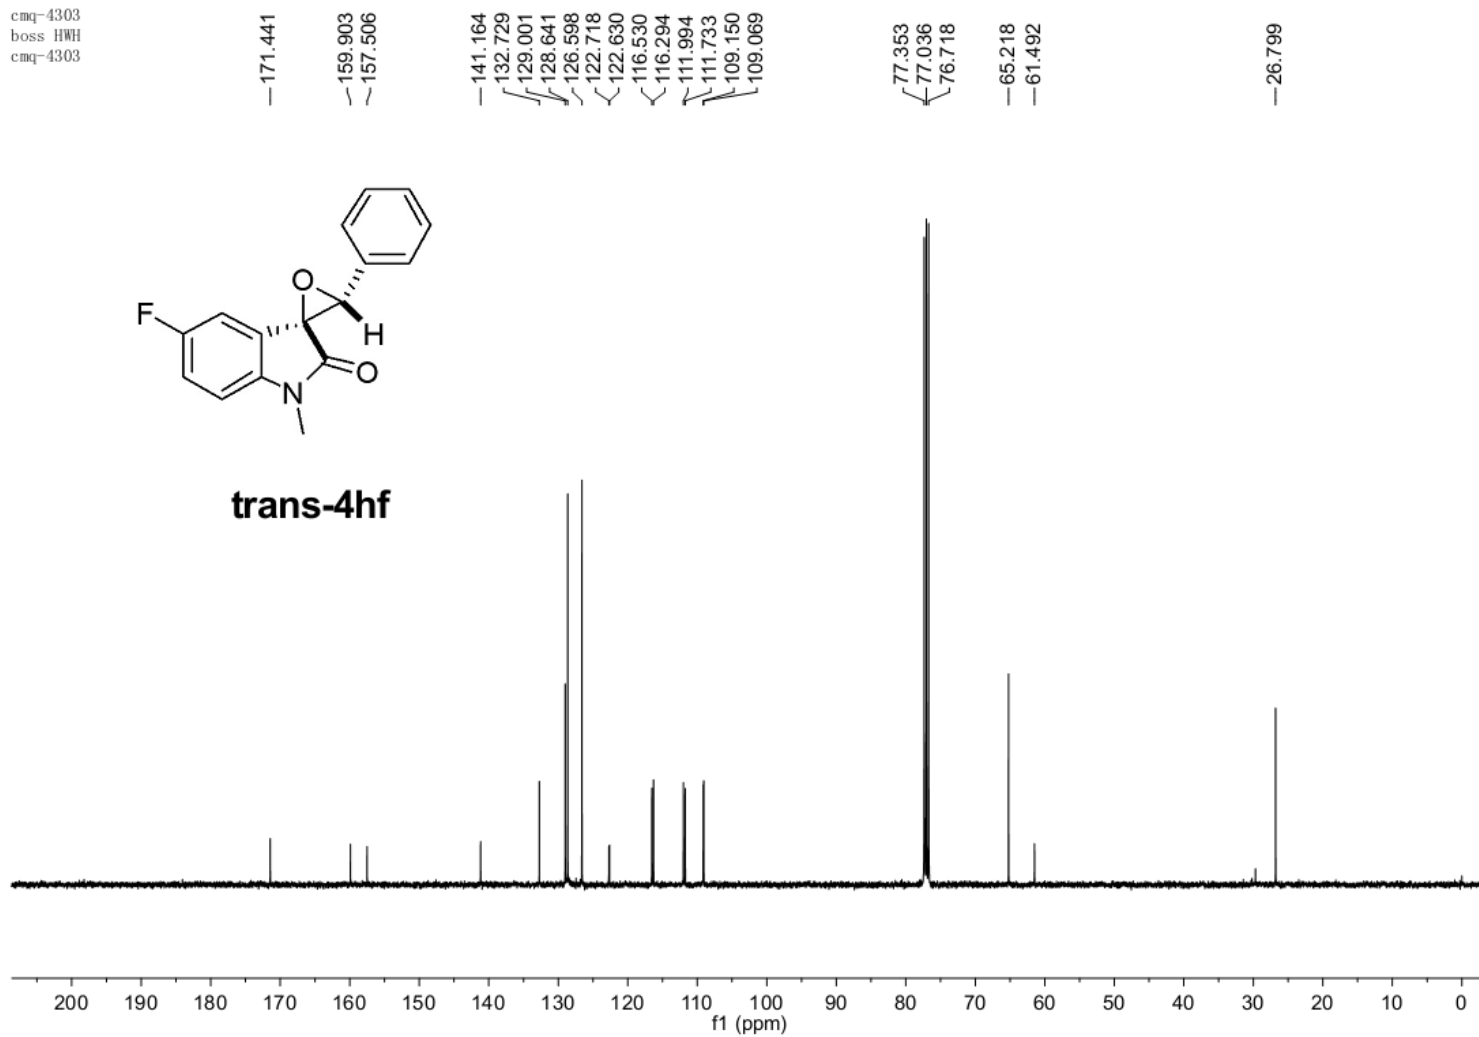

CMQ-3612  
boss boss HWH  
CMQ-3612

7.260  
7.260  
7.068  
7.046  
7.024  
6.819  
6.800

3.707  
3.696  
3.685  
— 3.247

1.727  
1.717  
1.649

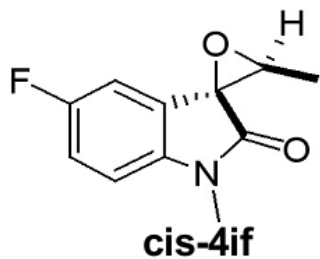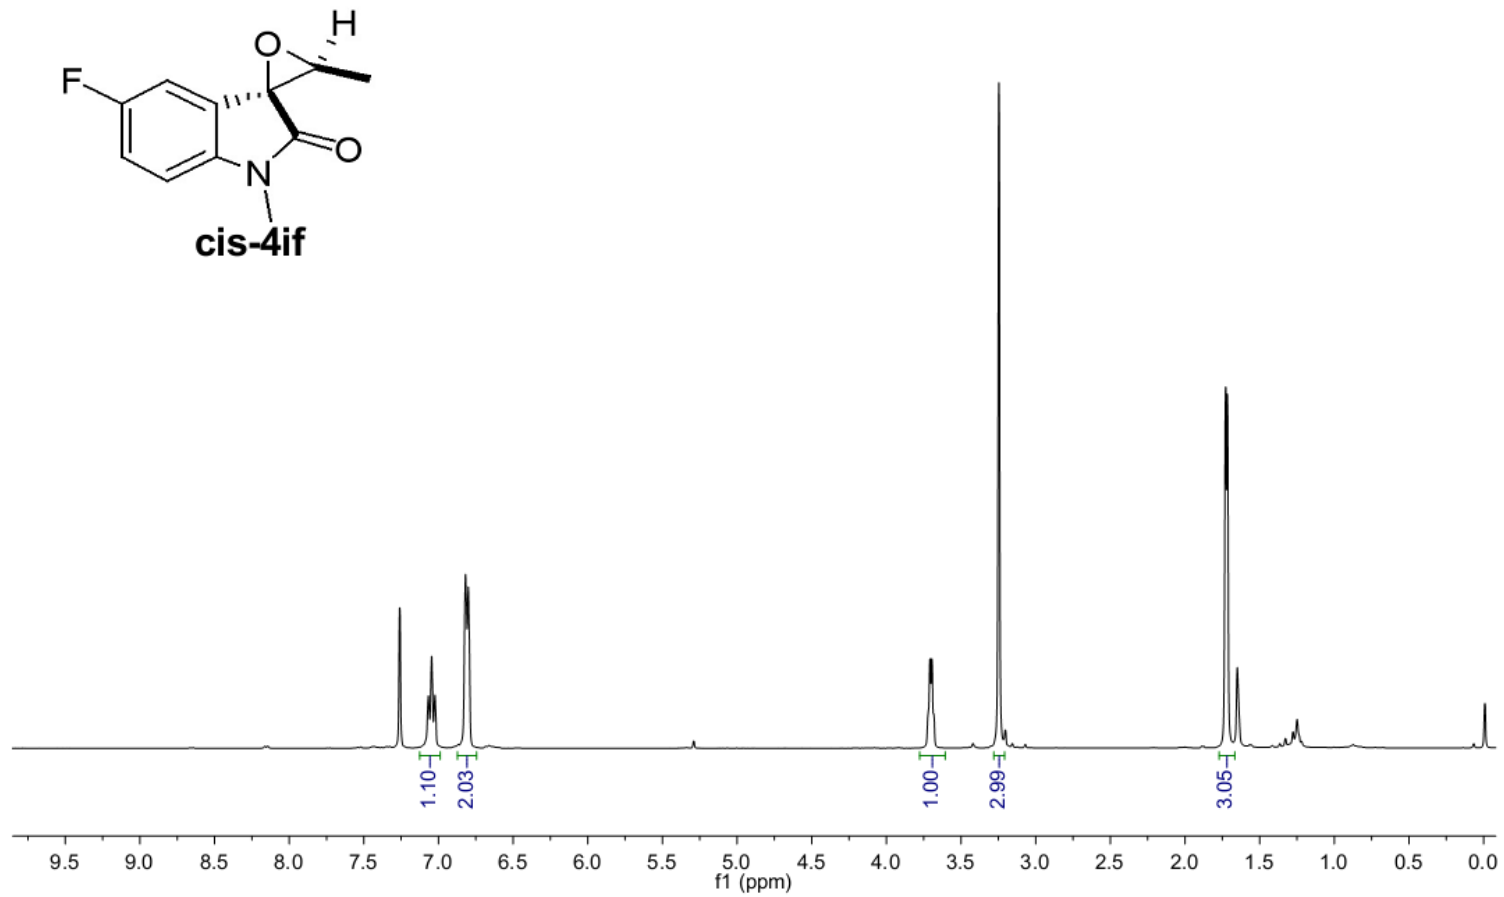

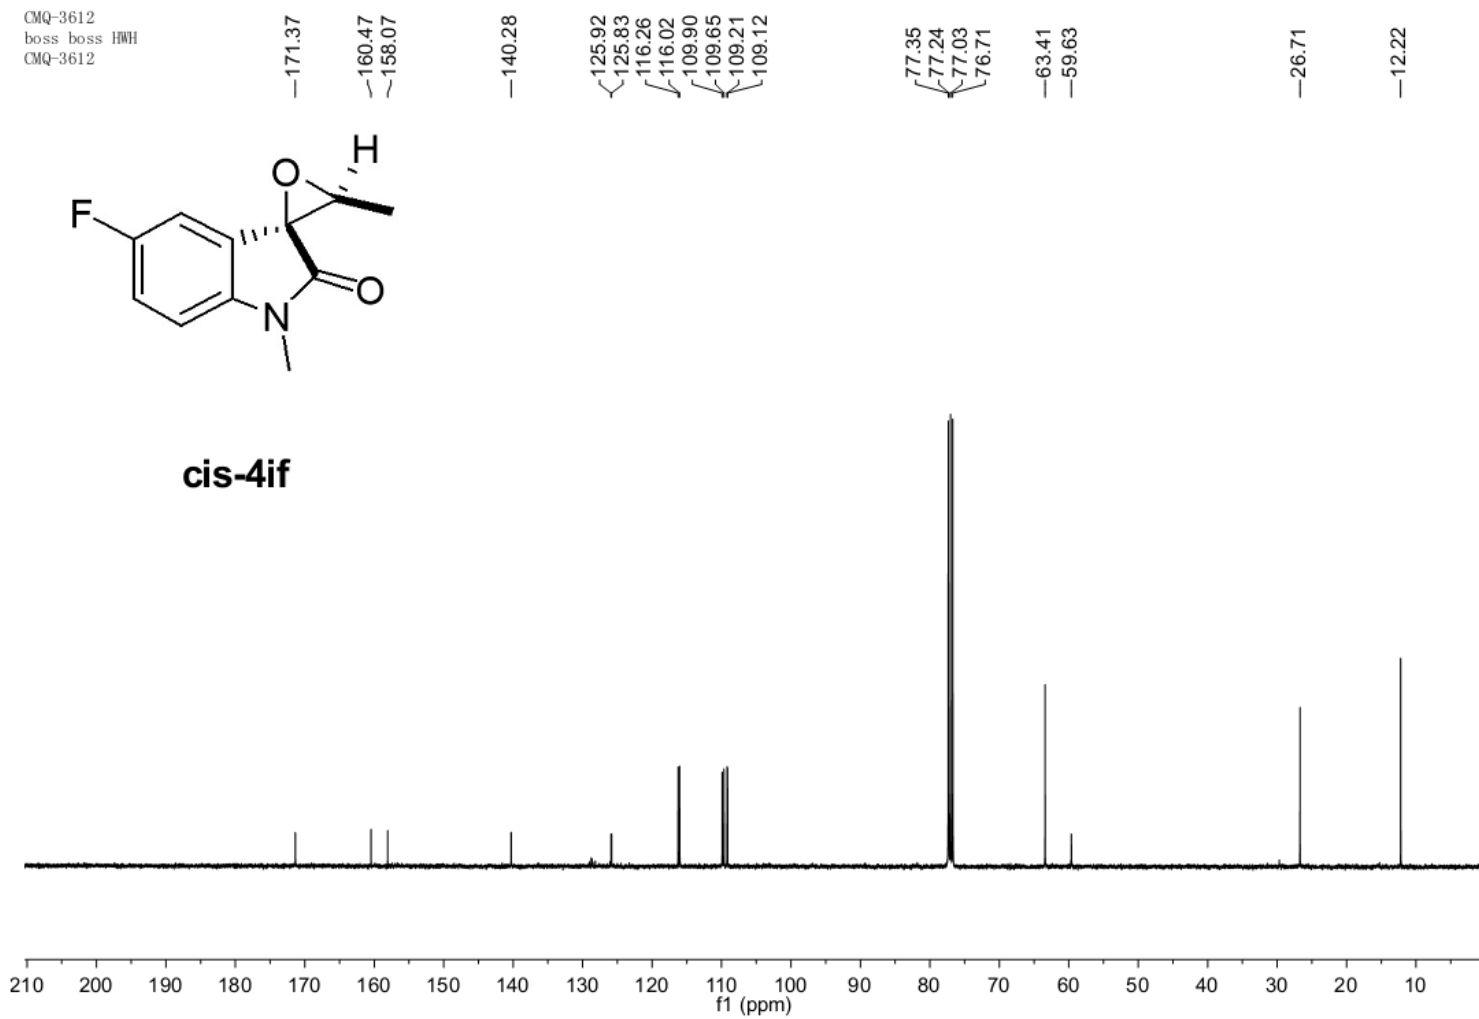



CMQ-3613  
boss boss HWH  
CMQ-3613

7.268  
7.124  
7.102  
7.080  
6.950  
6.931  
6.867  
6.859  
6.847

3.791  
3.778  
3.765  
3.752  
—  
3.259

1.659  
1.593  
1.580

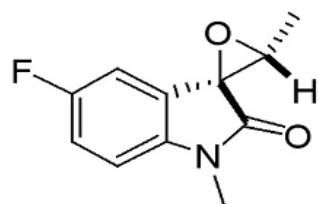

**trans-4if**

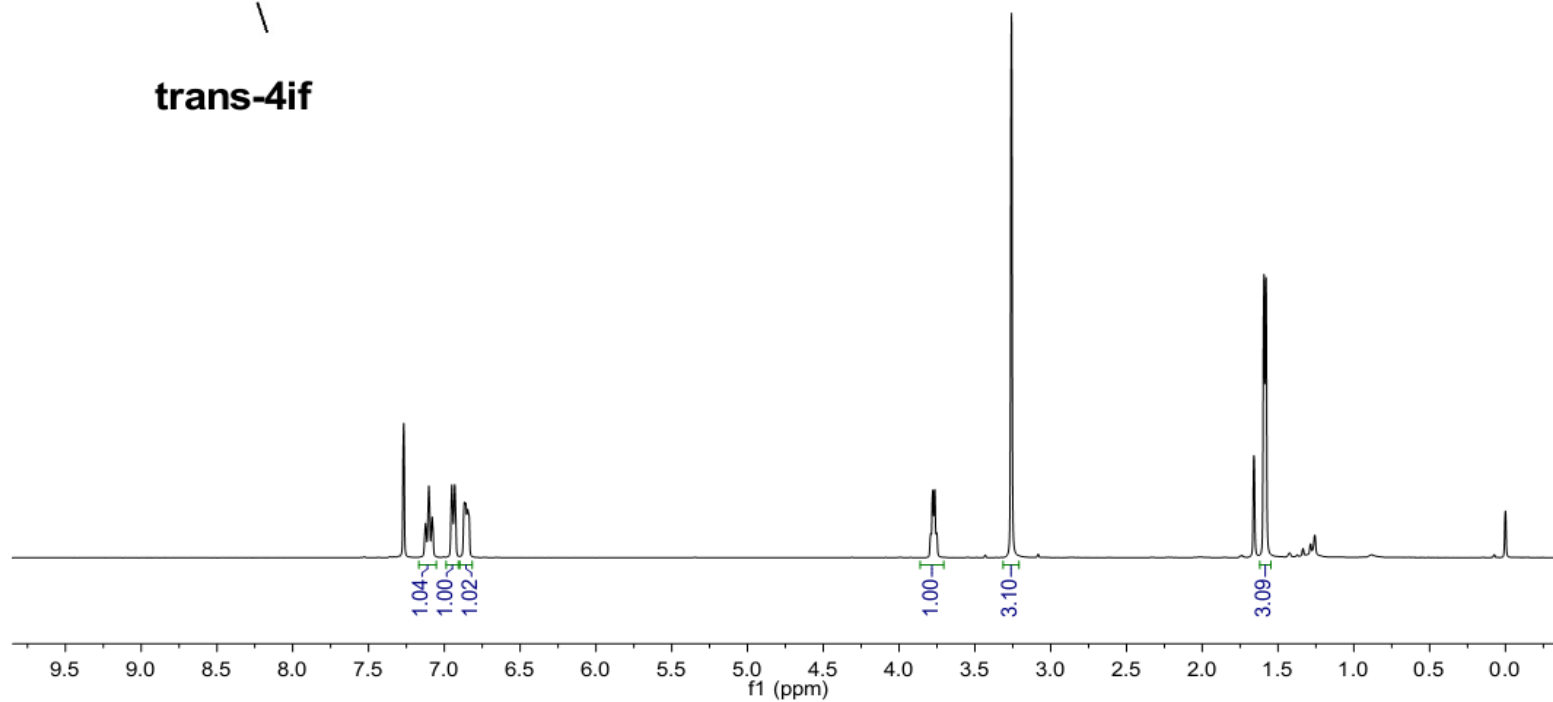

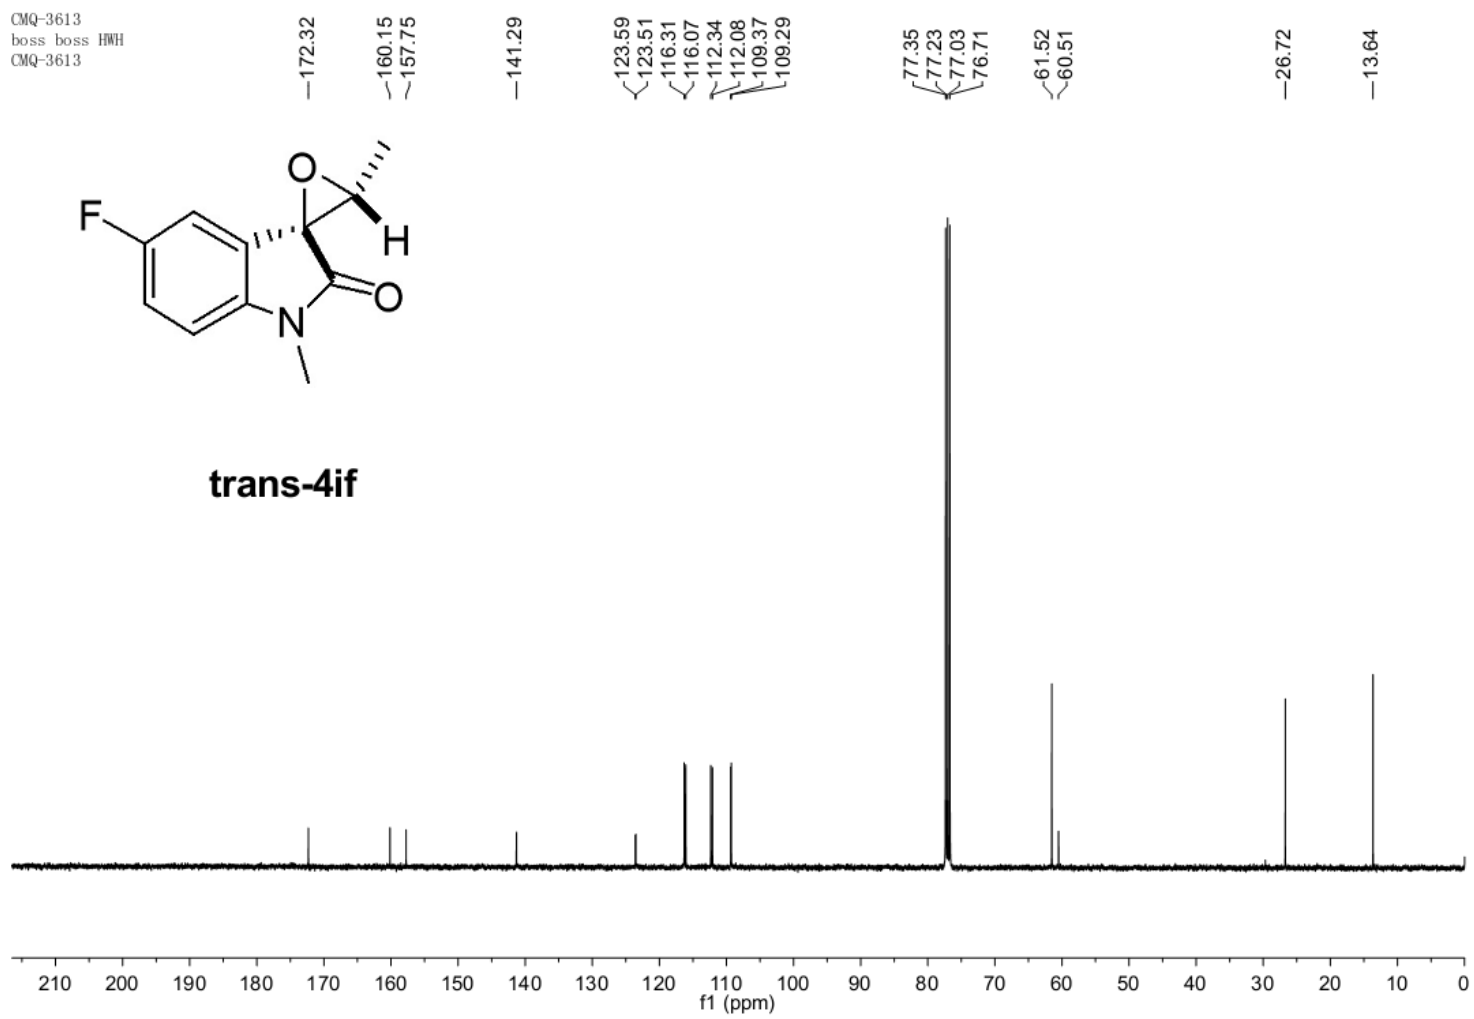

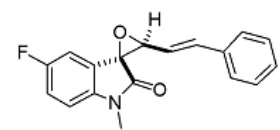

**cis-4af**

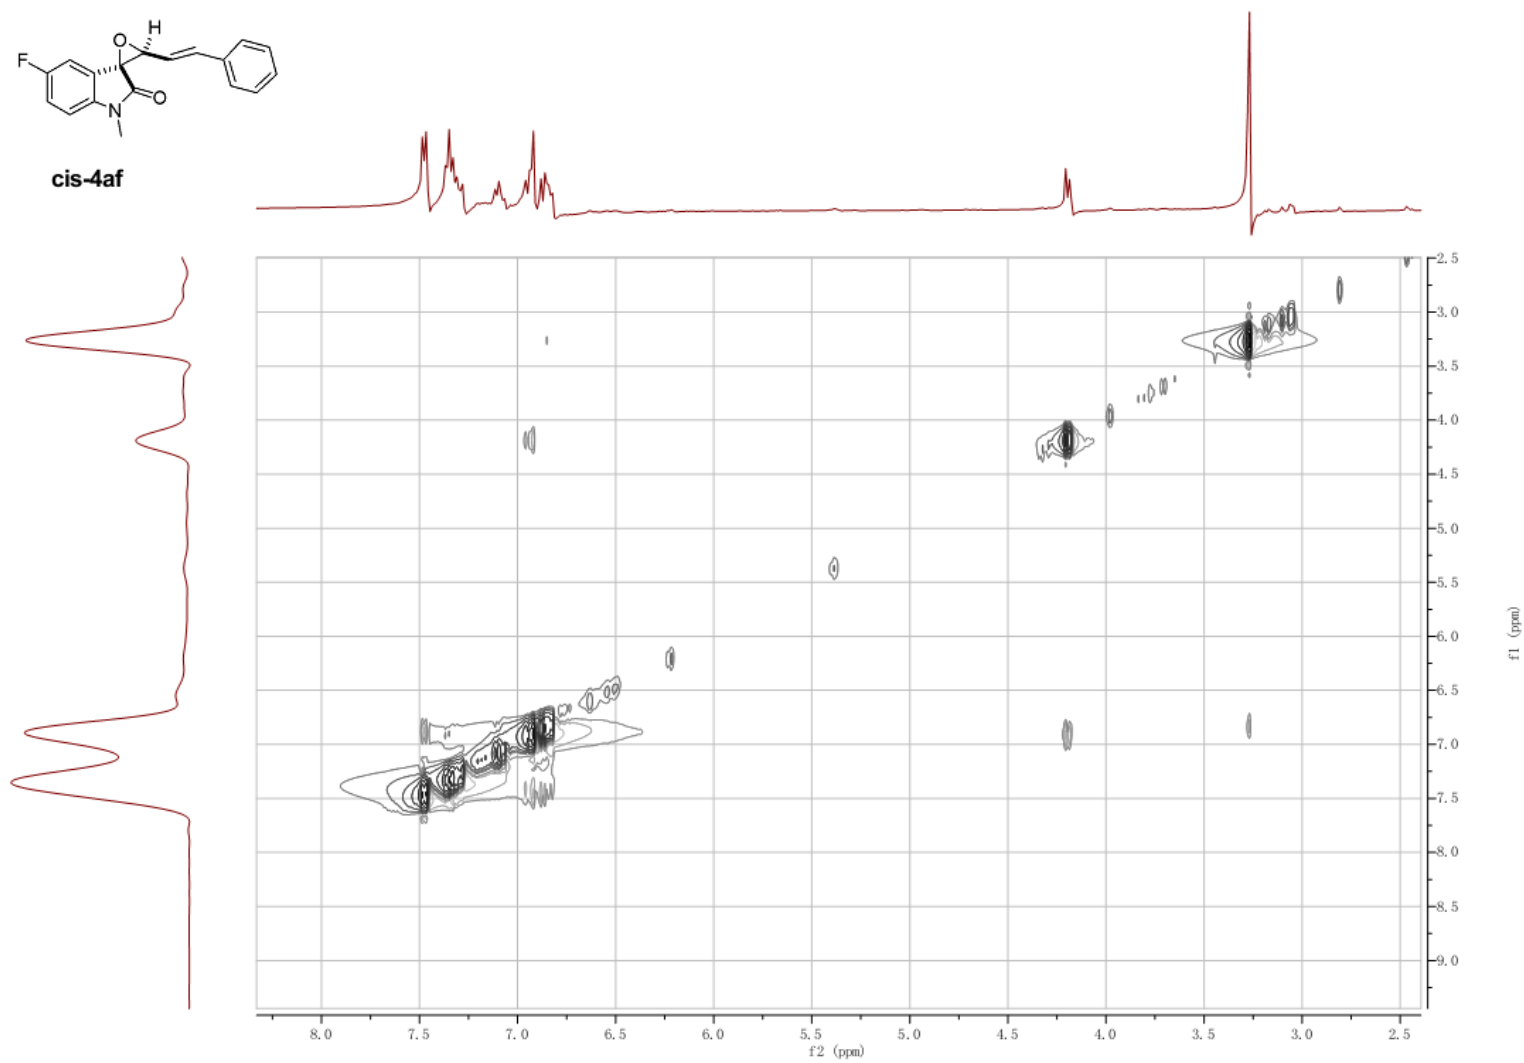

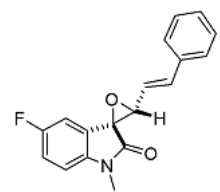

**trans-4af**

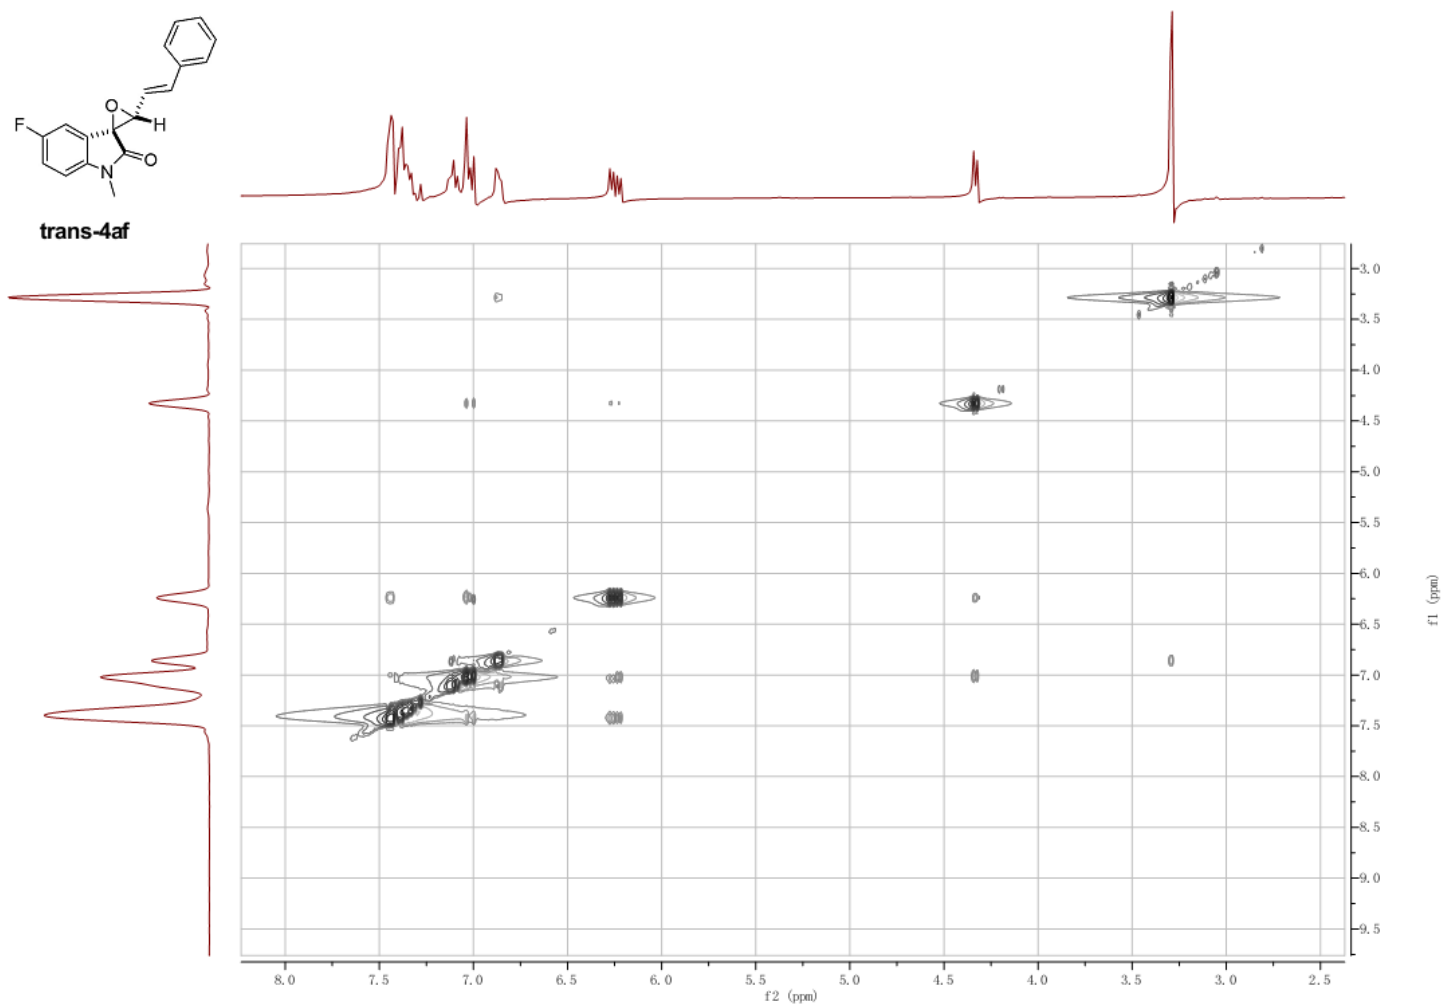

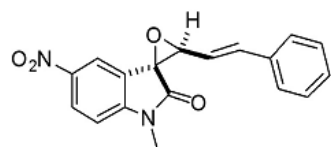

**cis-4ag**

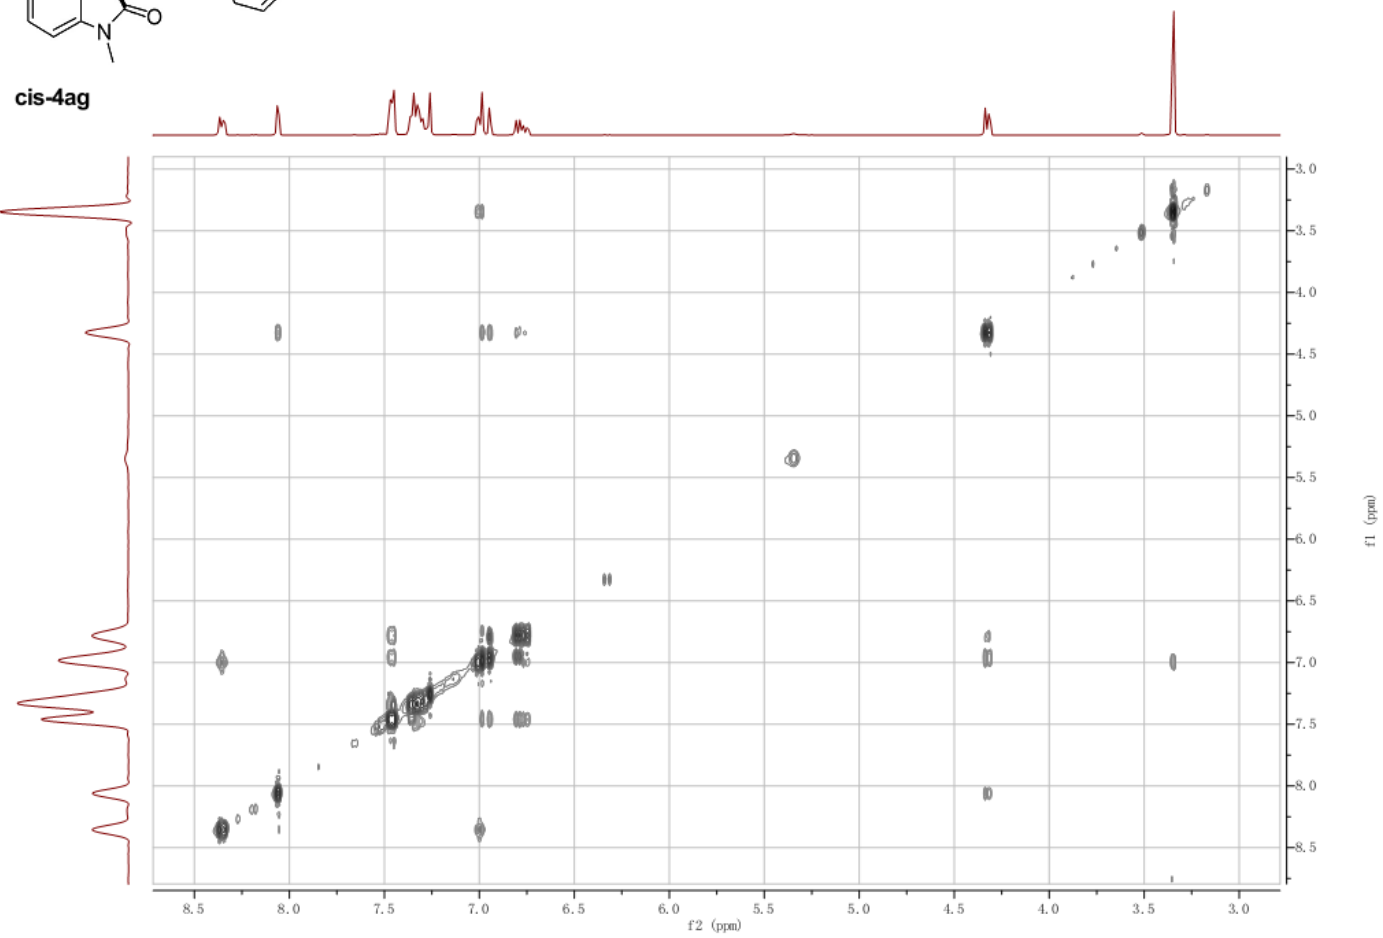

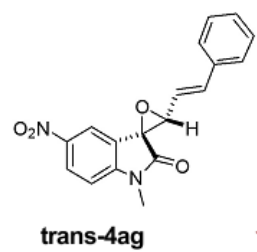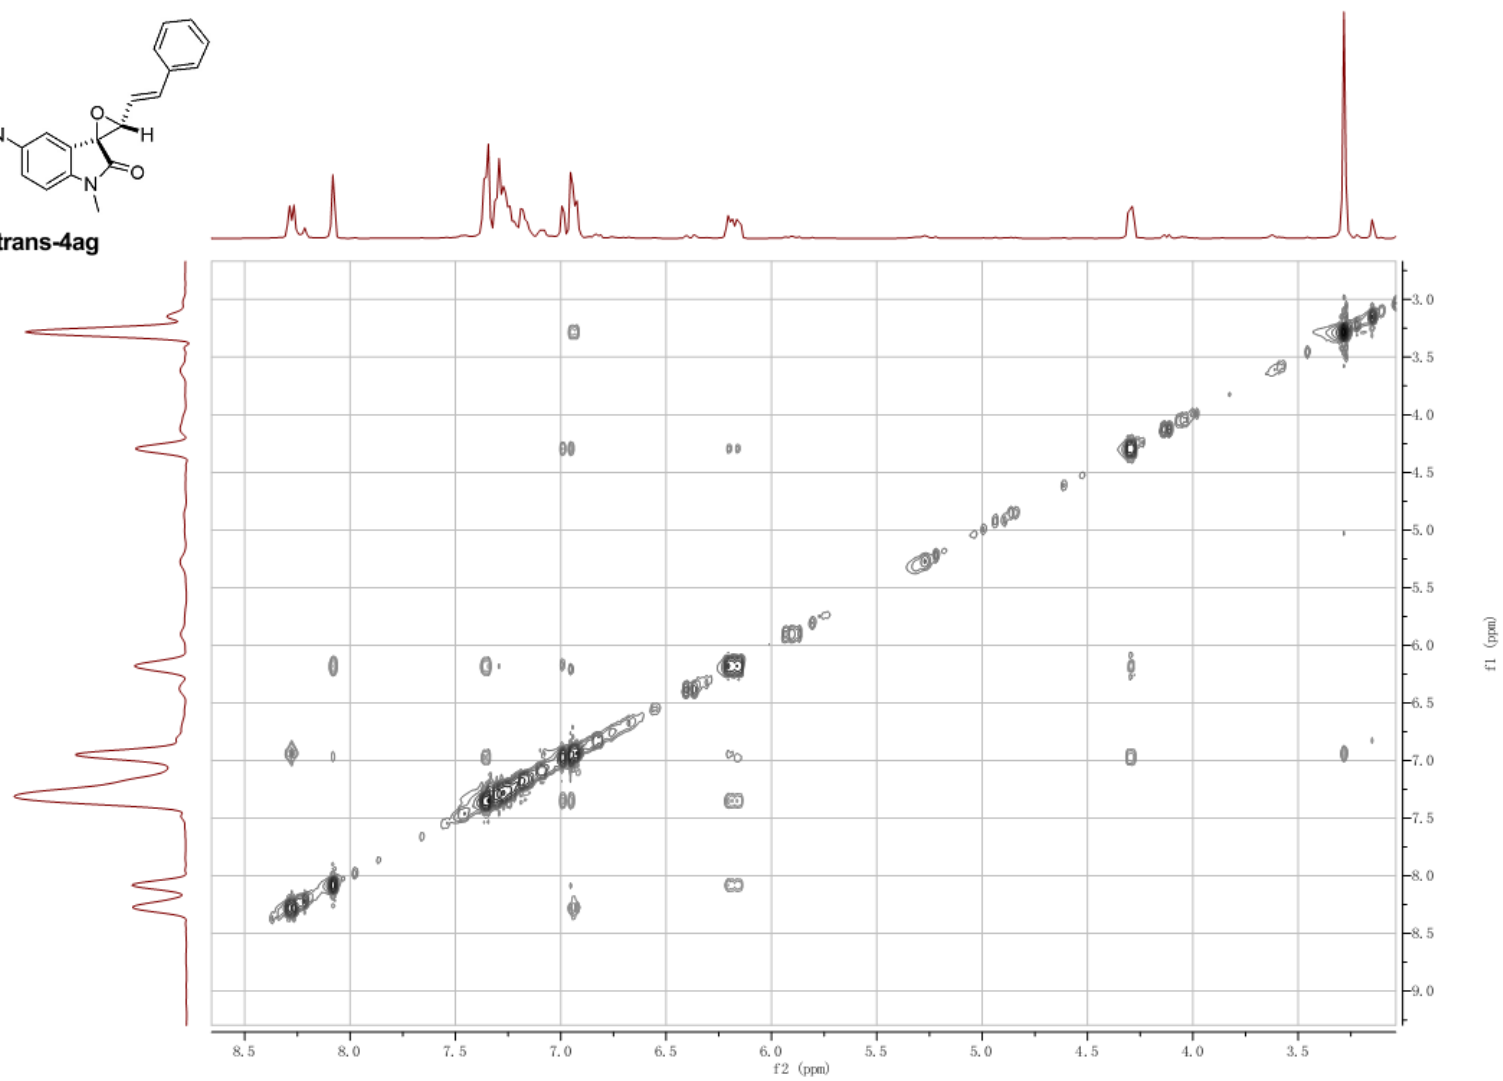

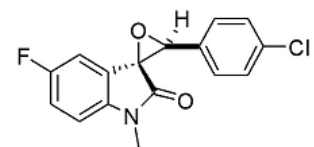

**cis-4ff**

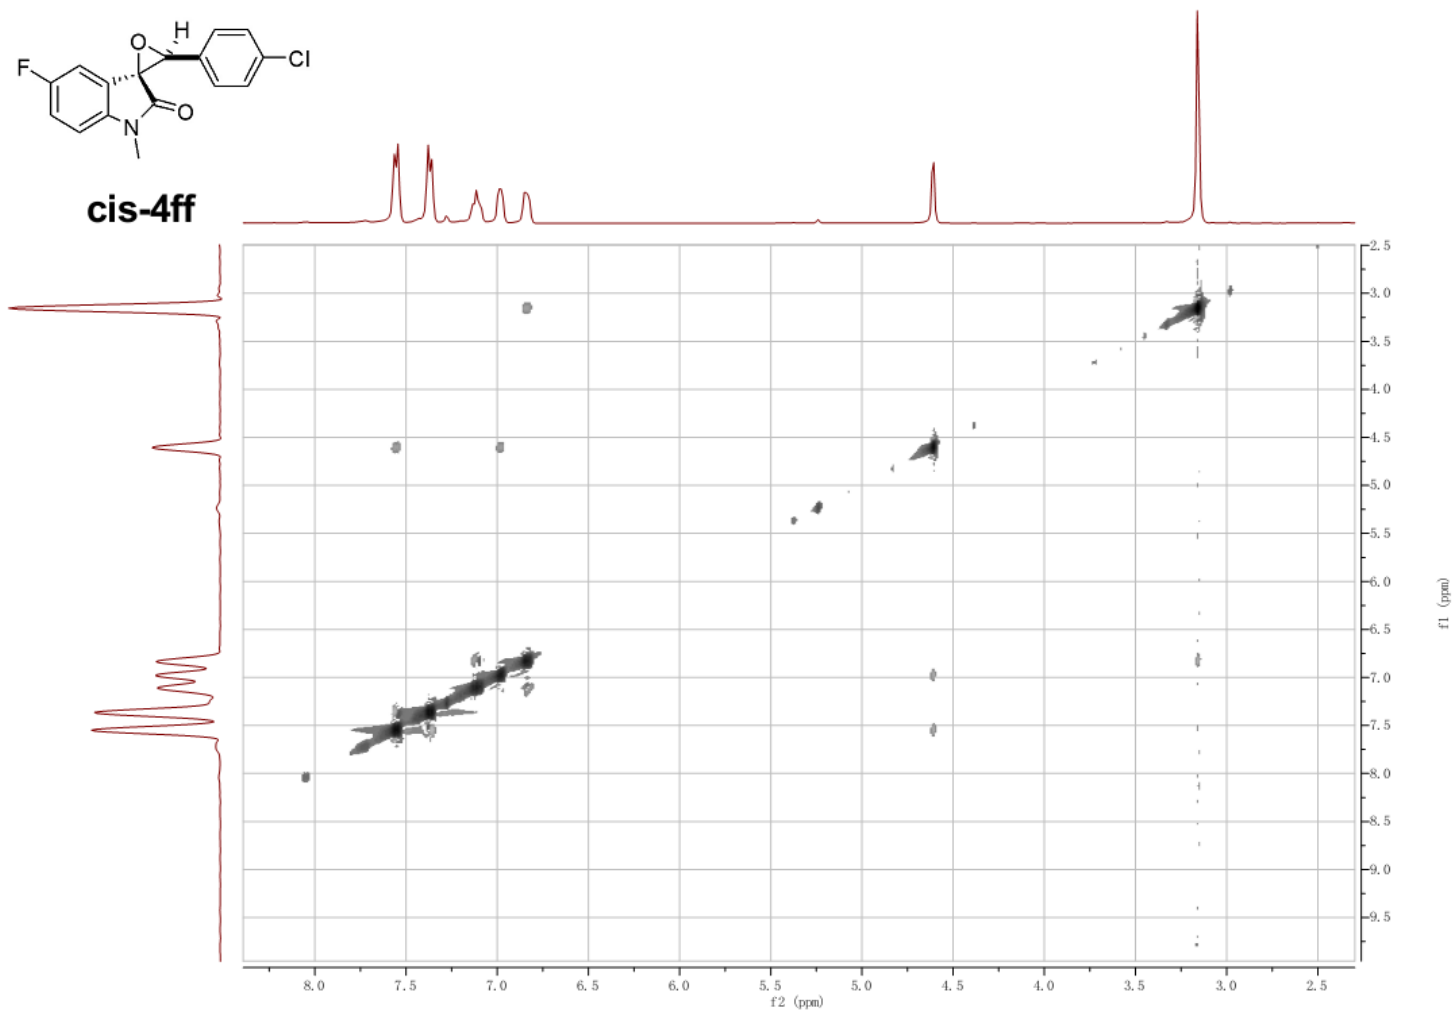

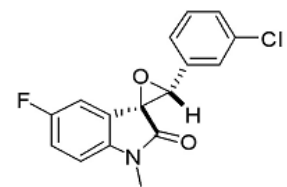

**trans-4ff**

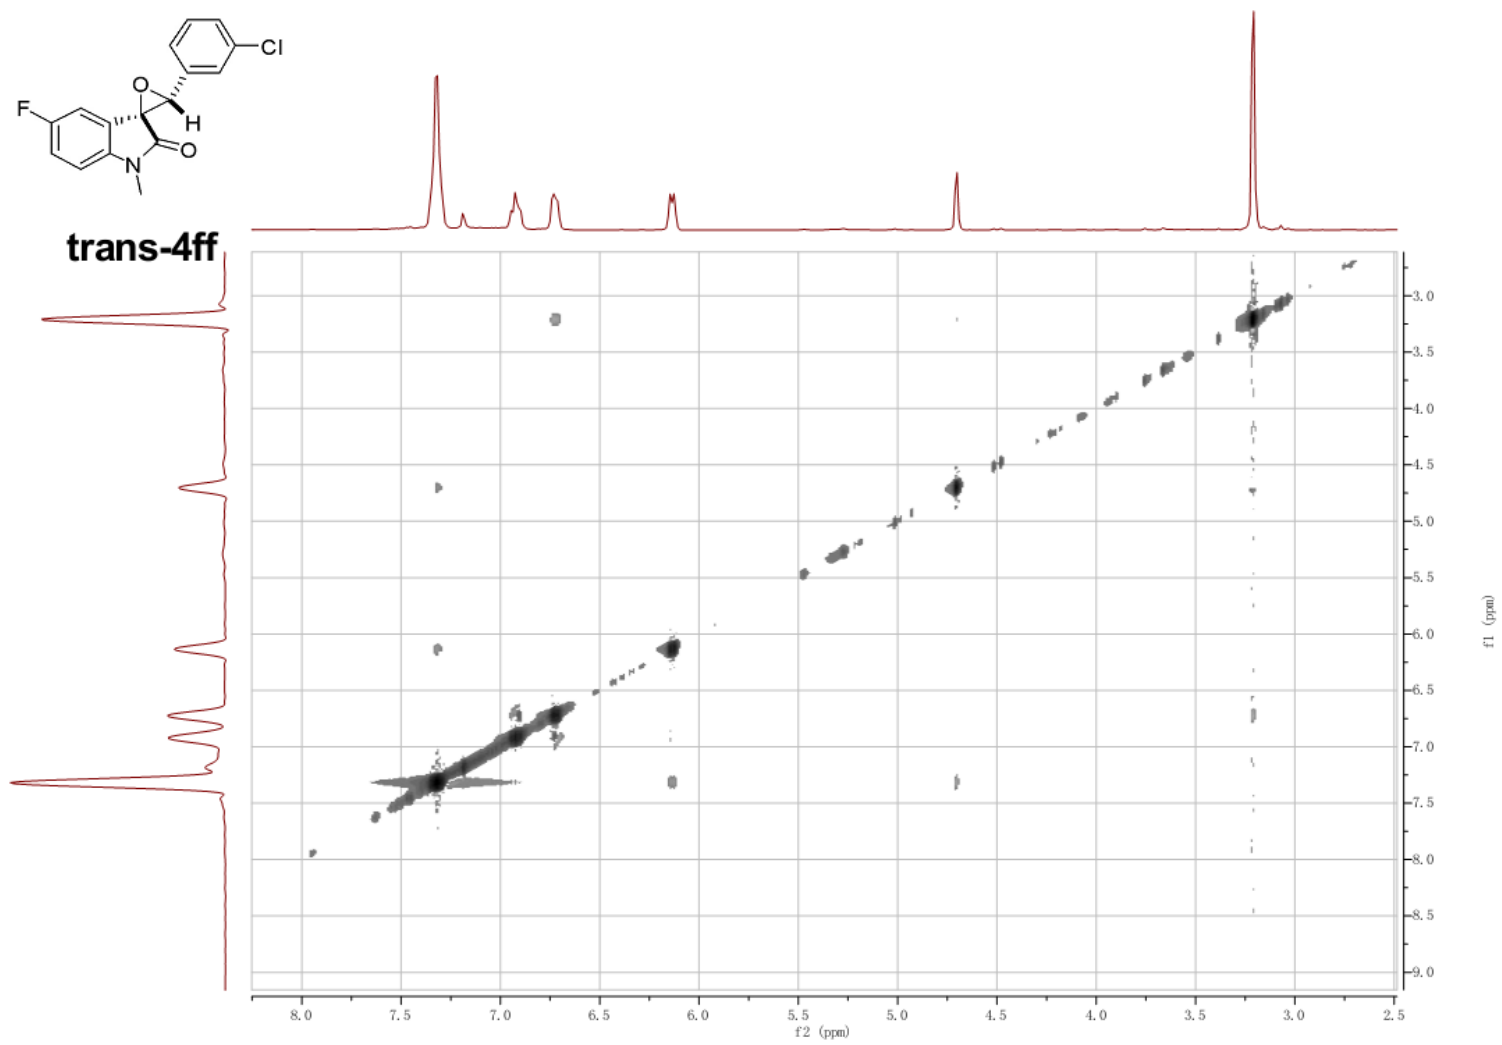



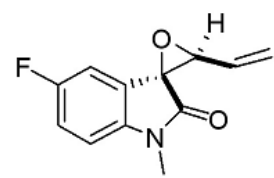

**cis-4gf**

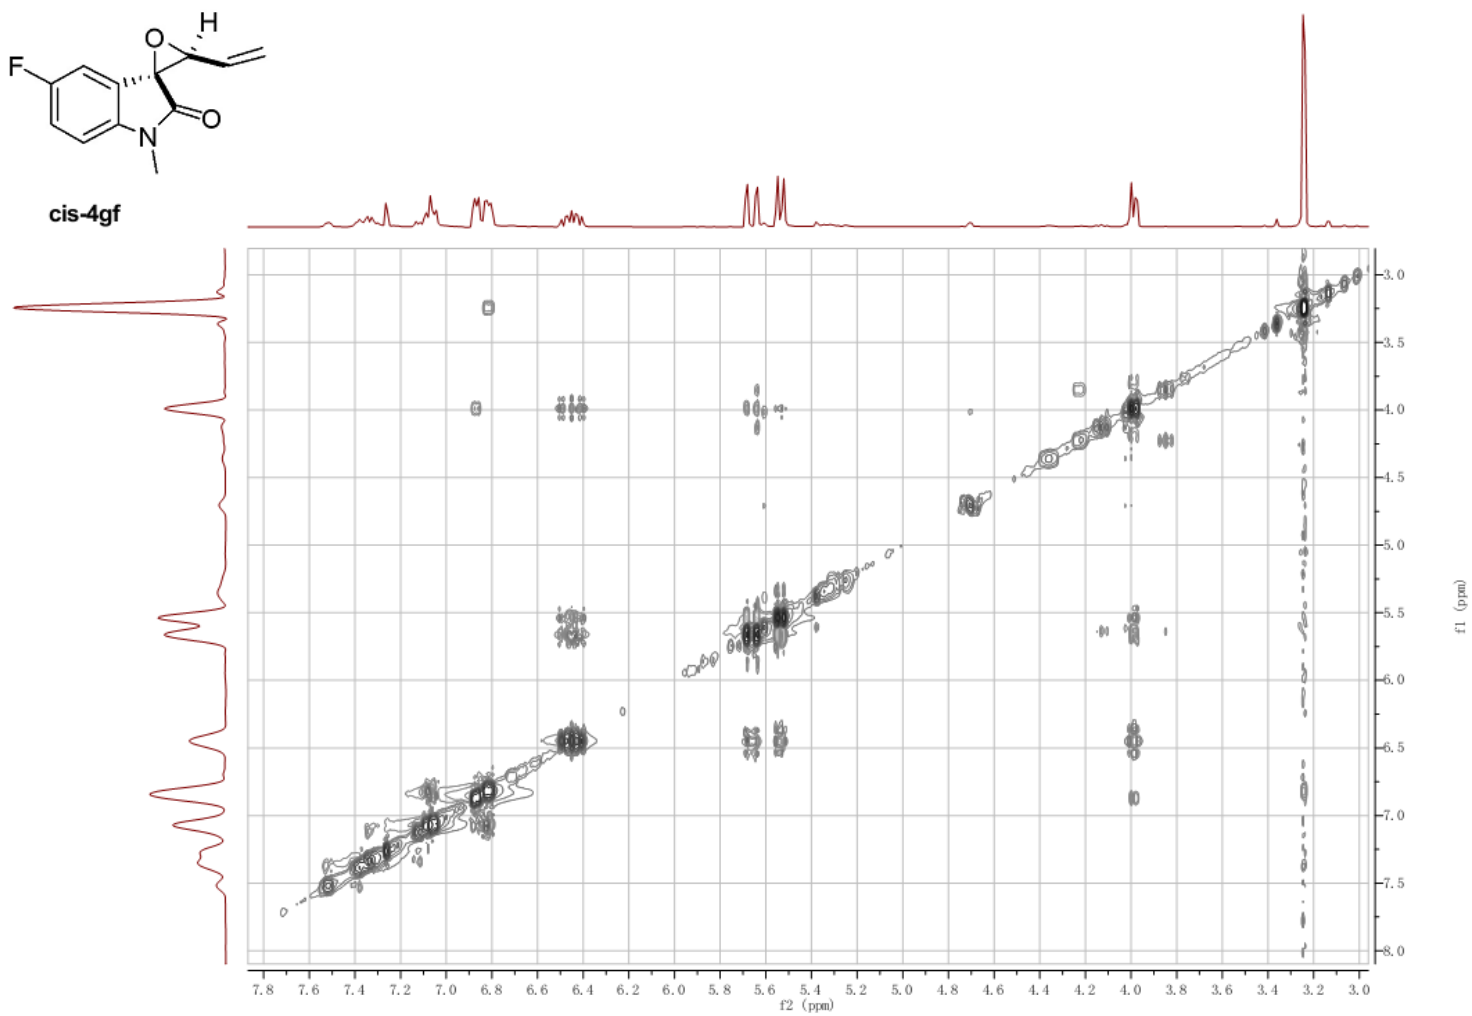

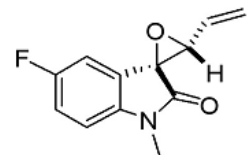

**trans-4gf**

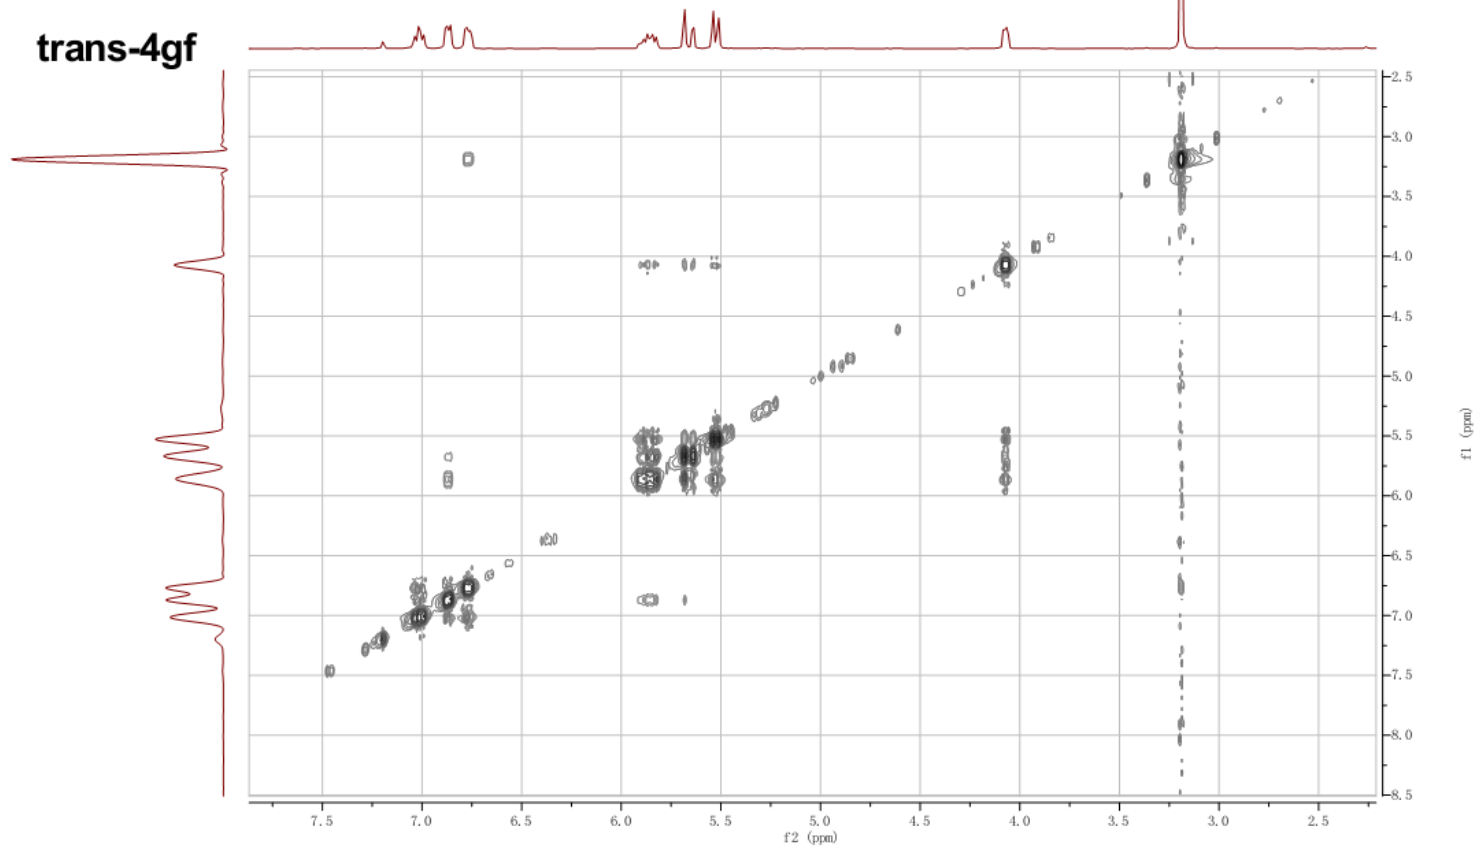

Supplement: c3ra47206j.pdf [file c3ra47206j.pdf]
